# Supplementary material for: Phase-transfer catalysed asymmetric synthesis of α-chiral tetrasubstituted α-aminothioesters
Source: Royal Society of Chemistry journal article supplement (doi:10.1039/d1ob00829c), 2021-01-01
Supplement: d1ob00829c1.pdf [file d1ob00829c1.pdf]

*Supporting Information*

**Phase-transfer catalysed asymmetric synthesis of  $\alpha$ -chiral tetrasubstituted  $\alpha$ -aminothioesters**

Yasushi Yoshida,\* Reina Kasuya, Takashi Mino, and Masami Sakamoto

Molecular Chirality Research Center, Graduate School of Science and Engineering, Chiba University

1-33, Yayoi-cho, Inage-ku, Chiba-shi, Chiba 263-8522 (Japan)

Fax +8143-290-3386

E-mail yoshiday@chiba-u.jp

**Table of Contents**

|                                                                                                                             |             |
|-----------------------------------------------------------------------------------------------------------------------------|-------------|
| <b>1. General information</b>                                                                                               | <b>S-1</b>  |
| <b>2. Synthesis of catalysts</b>                                                                                            | <b>S-2</b>  |
| <b>3. Synthesis of substrates</b>                                                                                           | <b>S-2</b>  |
| <b>4. General procedure for the catalytic Michael addition reaction of aldimino thioester</b>                               | <b>S-8</b>  |
| <b>5. Derivatisation of the product</b>                                                                                     | <b>S-14</b> |
| <b>6. <math>^1\text{H}</math>-, <math>^{13}\text{C}</math>-, and <math>^{19}\text{F}</math>-NMR spectra and HPLC charts</b> | <b>S-16</b> |

**1. General Information**

$^1\text{H}$ -,  $^{13}\text{C}$ -NMR spectra were recorded with Bruker AVANCE III-400M ( $^1\text{H}$ -NMR 400 MHz,  $^{13}\text{C}$ -NMR 100 MHz,  $^{19}\text{F}$ -NMR 376 MHz).  $^1\text{H}$ -NMR spectra are reported as follows: chemical shift in ppm ( $\delta$ ) relative to the chemical shift of  $\text{CHCl}_3$  at 7.26 ppm or tetramethylsilane at 0 ppm, integration, multiplicities (s = singlet, d = doublet, t = triplet, q = quartet, m = multiplet), and coupling constants (Hz).  $^{13}\text{C}$ -NMR spectra reported in ppm ( $\delta$ ) relative to the central line of triplet for  $\text{CDCl}_3$  at 77 ppm.  $\text{CF}_3\text{CO}_2\text{H}$  used as external standards for  $^{19}\text{F}$ . ESI-MS spectra were obtained with Thermo Fisher, Exactive. FT-IR spectra were recorded on a JASCO FT-IR system (FT/IR-460 Plus). Mp was measured with AS ONE ATM-02. Column chromatography on  $\text{SiO}_2$  and neutral  $\text{SiO}_2$  was performed with Kanto Silica Gel 60 (40-50  $\mu\text{m}$ ). All reactions were carried out under Ar atmosphere unless otherwise noted. Commercially available organic and inorganic compounds were used without further purification. All dehydrated solvents were purchased from Wako Pure Chemical Industries, Ltd. or Nacalai Tesque, Inc., and were used without further purification.

## 1. Synthesis of catalysts

**3a**,<sup>1</sup> **3b**,<sup>2</sup> and **3c**<sup>3</sup> were synthesized according to the reported procedure. **3d** was purchased from TCI.

## 2. Synthesis of substrates

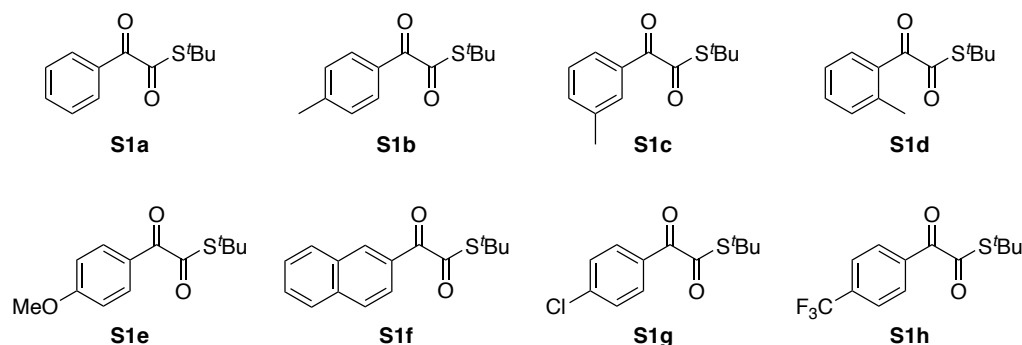

$\alpha$ -Ketothioester **S1a** was synthesized according to the reported procedure.<sup>4</sup>

$\alpha$ -Ketothioester **S1b-h** were prepared as follows, and NMR data for known compound **S1b** was matched with the literature value.<sup>4</sup>

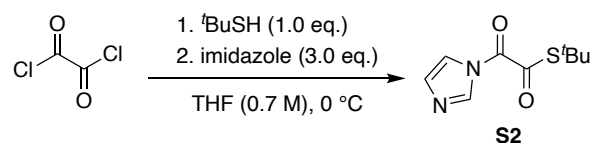

A solution of oxalyl chloride (1.0 eq.) in THF (0.7 M) was cooled to 0 °C, and *tert*-BuSH (1.0 eq.) was added slowly. The reaction was stirred for 1 hour, and the imidazole (3.5 M in THF, 3.0 eq.) was added. The reaction was stirred for 1 hour at the same temperature, which was quenched by the addition of excess amount of precooled (0 °C) diethyl ether. The solution was filtered by Celite (diethyl ether), solvent was evaporated to form crude **S2**, which was used to the next step without further purification.

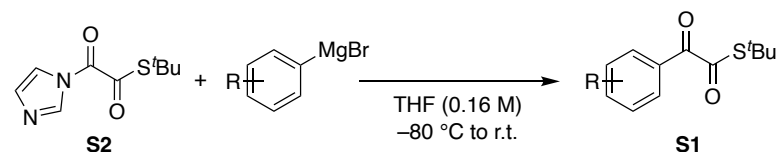

The solution of **S2** (1.0 eq.) in dry THF (0.16 M) was cooled to -80 °C and added corresponding Grignard reagent solution (1.3 eq. in THF) slowly. The solution was stirred for 10 min. at the same temperature, and warmed up to room temperature gradually (about 30 minutes). The reaction was continued for 2 hours before quenching by the addition of saturated  $\text{NH}_4\text{Cl}$  aq., extracted by EtOAc, dried over  $\text{Na}_2\text{SO}_4$ , evaporation of solvents provided the crude product. The crude product was purified by column chromatography (Silica-gel, ethyl acetate/hexane) to give the corresponding **S1**.

***S*-(*tert*-butyl) 2-oxo-2-(*m*-tolyl)ethanethioate (S1c)**

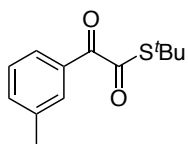

Yellow oil, 659.6 mg, 2.8 mmol, 20% yield.

$^1\text{H-NMR}$  (400 MHz, CHLOROFORM- $\text{D}$ )  $\delta$  7.87-7.84 (m, 2H), 7.46-7.43 (m, 1H), 7.40-7.35 (m, 1H), 2.41 (s, 3H), 1.60 (s, 9H);  $^{13}\text{C-NMR}$  (101 MHz, CHLOROFORM- $\text{D}$ )  $\delta$  193.7, 187.3, 138.6, 135.5, 131.5, 130.8, 128.6, 127.9, 49.0, 29.6, 21.3.

IR (NaCl)  $\nu$  2965, 1675, 1364, 1272, 900  $\text{cm}^{-1}$ .

HRMS (APCI $^+$  in MeCN) calcd for  $\text{C}_{13}\text{H}_{17}\text{O}_2\text{S}$  (M+H) 237.0944 found 237.0943.

***S*-(*tert*-butyl) 2-oxo-2-(*o*-tolyl)ethanethioate (S1d)**

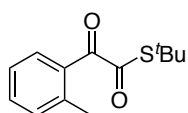

Yellow oil, 671.8 mg, 2.8 mmol, 20% yield.

$^1\text{H-NMR}$  (400 MHz, CHLOROFORM- $\text{D}$ )  $\delta$  7.71 (dd,  $J = 8.1, 1.3$  Hz, 1H), 7.49-7.45 (m, 1H), 7.32-7.28 (m, 2H), 2.54 (s, 3H), 1.59 (s, 9H);  $^{13}\text{C-NMR}$  (101 MHz, CHLOROFORM- $\text{D}$ )  $\delta$  194.0, 190.1, 140.9, 133.2, 132.1, 132.0, 131.2, 125.6, 49.0, 29.7, 21.3.

IR (NaCl)  $\nu$  2965, 1677, 1661, 1455, 841  $\text{cm}^{-1}$ .

HRMS (ESI $^+$  in MeCN) calcd for  $\text{C}_{13}\text{H}_{16}\text{O}_2\text{NaS}$  (M+Na) 259.0763 found 259.0760.

***S*-(*tert*-butyl) 2-(4-methoxyphenyl)-2-oxoethanethioate (S1e)**

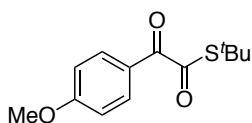

Yellow oil, 406.2 mg, 1.6 mmol, 23% yield.

$^1\text{H-NMR}$  (400 MHz, CHLOROFORM- $\text{D}$ )  $\delta$  8.10-8.06 (m, 2H), 6.98-6.95 (m, 2H), 3.89 (s, 3H), 1.59 (s, 9H);  $^{13}\text{C-NMR}$  (101 MHz, CHLOROFORM- $\text{D}$ )  $\delta$  194.1, 185.6, 164.8, 133.2, 124.4, 114.1, 55.6, 48.8, 29.6.

IR (NaCl)  $\nu$  2961, 1667, 1264, 1173, 749  $\text{cm}^{-1}$ .

HRMS (ESI $^+$  in MeCN) calcd for  $\text{C}_{13}\text{H}_{17}\text{O}_3\text{S}$  (M+H) 253.0893 found 253.0888.

**S-(tert-butyl) 2-(naphthalen-2-yl)-2-oxoethanethioate (S1f)**

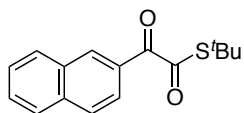

Yellow oil, 866.4 mg, 3.2 mmol, 46% yield.

<sup>1</sup>H-NMR (400 MHz, CHLOROFORM-D) δ 8.68 (s, 1H), 8.05 (dd, *J* = 8.1, 1.6 Hz, 1H), 7.97 (d, *J* = 8.1 Hz, 1H), 7.91-7.85 (m, 2H), 7.63 (dd, *J* = 8.0, 7.0 Hz, 1H), 7.56 (dd, *J* = 8.0, 7.0 Hz, 1H), 1.63 (s, 9H); <sup>13</sup>C-NMR (101 MHz, CHLOROFORM-D) δ 193.7, 186.9, 136.1, 133.9, 132.2, 130.1, 129.4, 128.78, 128.76, 127.8, 127.0, 124.7, 49.0, 29.6.

IR (NaCl) ν 2963, 1670, 1458, 1362, 1280, 1051, 753 cm<sup>-1</sup>.

HRMS (APCI<sup>+</sup> in MeCN) calcd for C<sub>16</sub>H<sub>17</sub>O<sub>2</sub>S (M+H) 273.0944 found 273.0943.

**S1g** and **S1h** could not be isolated with *S,S*-di-*tert*-butyl ethanebis(thioate) and used in the next step without further purification.

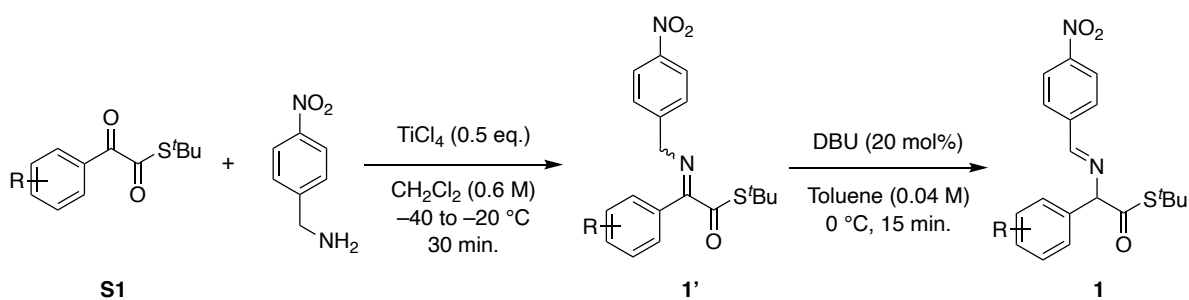

To a solution of 4-Nitrobenzylamine (3.0 eq.) in CH<sub>2</sub>Cl<sub>2</sub> (0.6 M) at -40 °C, α-ketothioester (1.0 eq. in CH<sub>2</sub>Cl<sub>2</sub>) was added and stirred for 5 minutes. TiCl<sub>4</sub> (1.0 M in CH<sub>2</sub>Cl<sub>2</sub>, 0.5 eq.) was slowly added and stirred for 30 minutes before increasing the reaction temperature slowly (around 30 minutes) to -20 °C. The reaction was quenched by the adding into pre-cooled (-20 °C) diethyl ether (20 times larger volume to the reaction solvent), and stirred for 20 minutes at -20 °C. The reaction solution was filtered through Celite (diethyl ether) and the solvent was removed by evaporation to give the crude **1'**. The crude **1'** was dissolved in toluene (0.04 M) and cool to 0 °C. DBU (20 mol%) was added to the reaction and the obtained blue solution was stirred for 15 minutes at the same temperature. The reaction was quenched by the addition of saturated NH<sub>4</sub>Cl aq., extracted with diethyl ether, dried over Na<sub>2</sub>SO<sub>4</sub>, filtered and solvents were removed under vacuum to give crude material. The crude product was purified by column chromatography (neutral Silica-gel, ethyl acetate/hexane) to give the corresponding aldiminothioester **1**.

***S*-(*tert*-butyl) (*E*)-2-((4-nitrobenzylidene)amino)-2-phenylethanethioate (1a)**

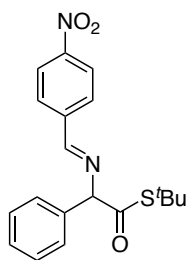

Orange oil, 707.2 mg, 2.0 mmol, 32% yield.

<sup>1</sup>H-NMR (400 MHz, CHLOROFORM-D) δ 8.39 (s, 1H), 8.31-8.28 (m, 2H), 8.04-8.00 (m, 2H), 7.52-7.49 (m, 2H), 7.41-7.31 (m, 3H), 5.14 (s, 1H), 1.45 (s, 9H); <sup>13</sup>C-NMR (101 MHz, CHLOROFORM-D) δ 199.3, 161.1, 149.3, 141.0, 137.9, 129.4, 128.8, 128.3, 127.8, 123.9, 84.0, 48.1, 29.7.

IR (NaCl) ν 2963, 1675, 1518, 1347, 1166, 747 cm<sup>-1</sup>.

HRMS (ESI<sup>+</sup> in MeCN) calcd for C<sub>19</sub>H<sub>21</sub>O<sub>3</sub>N<sub>2</sub>S (M+H) 357.1267 found 357.1264.

***S*-(*tert*-butyl) (*E*)-2-((4-nitrobenzylidene)amino)-2-(*p*-tolyl)ethanethioate (1b)**

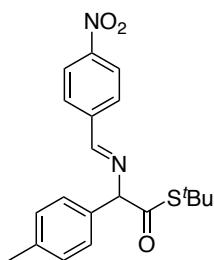

Yellow oil, 144.1 mg, 0.4 mmol, 18% yield.

<sup>1</sup>H-NMR (400 MHz, CHLOROFORM-D) δ 8.37 (s, 1H), 8.30-8.27 (m, 2H), 8.03-7.99 (m, 2H), 7.40-7.37 (m, 2H), 7.21-7.18 (m, 2H), 5.11 (s, 1H), 2.35 (s, 3H), 1.45 (s, 9H); <sup>13</sup>C-NMR (101 MHz, CHLOROFORM-D) δ 199.5, 160.9, 149.3, 141.1, 138.2, 135.0, 129.5, 129.4, 127.7, 123.8, 83.7, 48.0, 29.7, 21.2.

IR (NaCl) ν 2966, 2849, 1675, 1519, 1349, 1060, 863 cm<sup>-1</sup>.

HRMS (ESI<sup>+</sup> in MeCN) calcd for C<sub>20</sub>H<sub>23</sub>O<sub>3</sub>N<sub>2</sub>S (M+H) 371.1424 found 371.1418.

***S*-(*tert*-butyl) (*E*)-2-((4-nitrobenzylidene)amino)-2-(*m*-tolyl)ethanethioate (1c)**

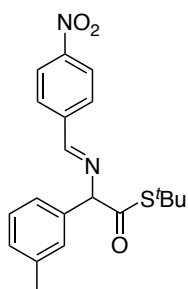

Orange oil, 272.2 mg, 0.7 mmol, 35% yield.

$^1\text{H-NMR}$  (400 MHz, CHLOROFORM-D)  $\delta$  8.34 (s, 1H), 8.29-8.26 (m, 2H), 8.01-7.98 (m, 2H), 7.57-7.53 (m, 1H), 7.26-7.20 (m, 3H), 5.40 (s, 1H), 2.45 (s, 3H), 1.46 (s, 9H);  $^{13}\text{C-NMR}$  (101 MHz, CHLOROFORM-D)  $\delta$  199.5, 161.0, 149.2, 141.1, 136.4, 136.2, 130.9, 129.3, 128.9, 128.3, 126.3, 123.8, 80.8, 48.1, 29.7, 20.0.

IR (NaCl)  $\nu$  2966, 2859, 1675, 1520, 1347, 1050, 854  $\text{cm}^{-1}$ .

HRMS (ESI<sup>+</sup> in MeCN) calcd for  $\text{C}_{20}\text{H}_{23}\text{O}_3\text{N}_2\text{S}$  (M+H) 371.1424 found 371.1419.

***S*-(*tert*-butyl) (*E*)-2-((4-nitrobenzylidene)amino)-2-(*o*-tolyl)ethanethioate (1d)**

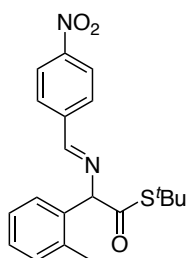

Colorless oil, 215.9 mg, 0.6 mmol, 28% yield.

$^1\text{H-NMR}$  (400 MHz, CHLOROFORM-D)  $\delta$  8.37 (s, 1H), 8.30-8.27 (m, 2H), 8.03-8.00 (m, 2H), 7.32-7.25 (m, 3H), 7.16-7.13 (m, 1H), 5.11 (s, 1H), 2.37 (s, 3H), 1.45 (s, 9H);  $^{13}\text{C-NMR}$  (101 MHz, CHLOROFORM-D)  $\delta$  199.4, 161.0, 149.2, 141.0, 138.5, 137.8, 129.4, 129.1, 128.6, 128.4, 124.8, 123.8, 83.9, 48.0, 29.7, 21.4.

IR (NaCl)  $\nu$  3103, 3022, 2962, 2887, 1669, 1600, 1521, 1345, 1070, 857  $\text{cm}^{-1}$ .

HRMS (ESI<sup>+</sup> in MeCN) calcd for  $\text{C}_{20}\text{H}_{23}\text{O}_3\text{N}_2\text{S}$  (M+H) 371.1424 found 371.1416.

***S*-(*tert*-butyl)(*E*)-2-(4-methoxyphenyl)-2-((4-nitrobenzylidene)amino)ethanethioate (1e)**

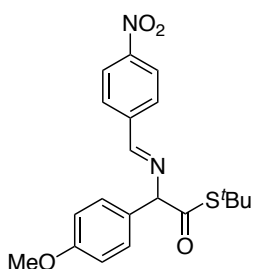

Colorless oil, 129.7mg, 0.3 mmol, 26% yield.

$^1\text{H-NMR}$  (400 MHz, CHLOROFORM-D)  $\delta$  8.37 (s, 1H), 8.31-8.28 (m, 2H), 8.03-8.00 (m, 2H), 7.44-7.40 (m, 2H), 6.94-6.90 (m, 2H), 5.10 (s, 1H), 3.81 (s, 3H), 1.45 (s, 9H);  $^{13}\text{C-NMR}$  (101 MHz, CHLOROFORM-D)  $\delta$  199.6, 160.8, 159.6, 149.3, 141.1, 130.0, 129.4, 129.0, 123.9, 114.2, 83.3, 55.3, 48.0, 29.7.

IR (NaCl)  $\nu$  2962, 2858, 1675, 1517, 1347, 1257, 1174, 1027, 847  $\text{cm}^{-1}$ .

HRMS (ESI<sup>+</sup> in MeCN) calcd for  $\text{C}_{20}\text{H}_{23}\text{O}_4\text{N}_2\text{S}$  (M+H) 387.1373 found 387.1368.

***S*-(*tert*-butyl) (*E*)-2-(naphthalen-2-yl)-2-((4-nitrobenzylidene)amino)ethanethioate (1f)**

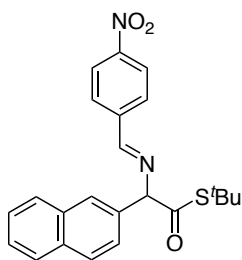

Brown oil, 70.8 mg, 0.1 mmol, 6% yield.

<sup>1</sup>H-NMR (400 MHz, CHLOROFORM-D) δ 8.44 (s, 1H), 8.32-8.29 (m, 2H), 8.06-8.03 (m, 2H), 7.93 (brs, 1H), 7.88-7.82 (m, 3H), 7.65 (dd, *J* = 8.5, 1.7 Hz, 1H), 7.52-7.48 (m, 2H), 5.31 (s, 1H), 1.45 (s, 9H); <sup>13</sup>C-NMR (101 MHz, CHLOROFORM-D) δ 199.3, 161.3, 149.3, 141.0, 135.3, 133.2, 133.1, 129.4, 128.6, 128.1, 127.7, 127.1, 126.34, 126.31, 125.2, 123.9, 84.0, 48.2, 29.7.

IR (NaCl) ν 2958, 1679, 1522, 1345, 1056, 854, 755 cm<sup>-1</sup>.

HRMS (ESI<sup>+</sup> in MeCN) calcd for C<sub>23</sub>H<sub>23</sub>O<sub>3</sub>N<sub>2</sub>S (M+H) 407.1424 found 407.1415.

***S*-(*tert*-butyl) (*E*)-2-(4-chlorophenyl)-2-((4-nitrobenzylidene)amino)ethanethioate (1g)**

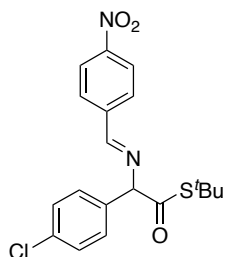

Orange oil, 79.4 mg, 0.20 mmol, 10% yield from **S2**.

<sup>1</sup>H-NMR (400 MHz, CHLOROFORM-D) δ 8.40 (s, 1H), 8.32-8.28 (m, 2H), 8.05-8.01 (m, 2H), 7.49-7.45 (m, 2H), 7.37-7.34 (m, 2H), 5.10 (s, 1H), 1.44 (s, 9H); <sup>13</sup>C-NMR (101 MHz, CHLOROFORM-D) δ 198.9, 161.5, 149.3, 140.8, 136.4, 134.2, 129.4, 129.0, 128.9, 123.9, 83.2, 48.2, 29.6.

IR (NaCl) ν 2966, 2865, 1675, 1602, 1524, 1345, 857 cm<sup>-1</sup>.

HRMS (ESI<sup>+</sup> in MeCN) calcd for C<sub>19</sub>H<sub>19</sub>ClN<sub>2</sub>O<sub>3</sub>S (M+H) 391.0878 found 391.0877.

***S*-(*tert*-butyl) (*E*)-2-((4-nitrobenzylidene)amino)-2-(4-(trifluoromethyl)phenyl)ethanethioate (1h)**

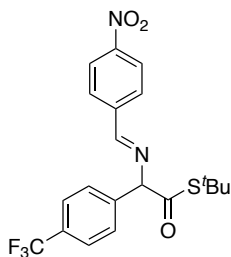

Orange oil, 127.2 mg, 0.30 mmol, 14% yield from **S2**.

$^1\text{H-NMR}$  (400 MHz, CHLOROFORM-D)  $\delta$  8.45 (s, 1H), 8.32-7.29 (m, 2H), 8.07-8.03 (m, 2H), 7.70-7.66 (m, 2H), 7.66-7.62 (m, 2H), 5.19 (s, 1H), 1.45 (s, 9H);  $^{13}\text{C-NMR}$  (101 MHz, CHLOROFORM-D)  $\delta$  198.4, 161.9, 149.4, 141.7, 140.7, 130.4 (q,  $J = 32.1$  Hz), 129.5, 128.0, 125.6 (q,  $J = 3.7$  Hz), 123.89, 123.94 (q,  $J = 270.2$  Hz), 83.5, 48.4, 29.6;  $^{19}\text{F-NMR}$  (377 MHz, CHLOROFORM-D)  $\delta$  -62.5.

IR (NaCl)  $\nu$  2968, 2865, 1677, 1602, 1526, 1325, 857  $\text{cm}^{-1}$ .

HRMS (ESI $^+$  in MeCN) calcd for  $\text{C}_{20}\text{H}_{20}\text{F}_3\text{N}_2\text{O}_3\text{S}$  (M+H) 425.1141 found 425.1132.

The isolation of the ketimine **1a'** for the substrate of umpolung reaction was failed due to the instability of C–N double bond (Please see the following schemes).

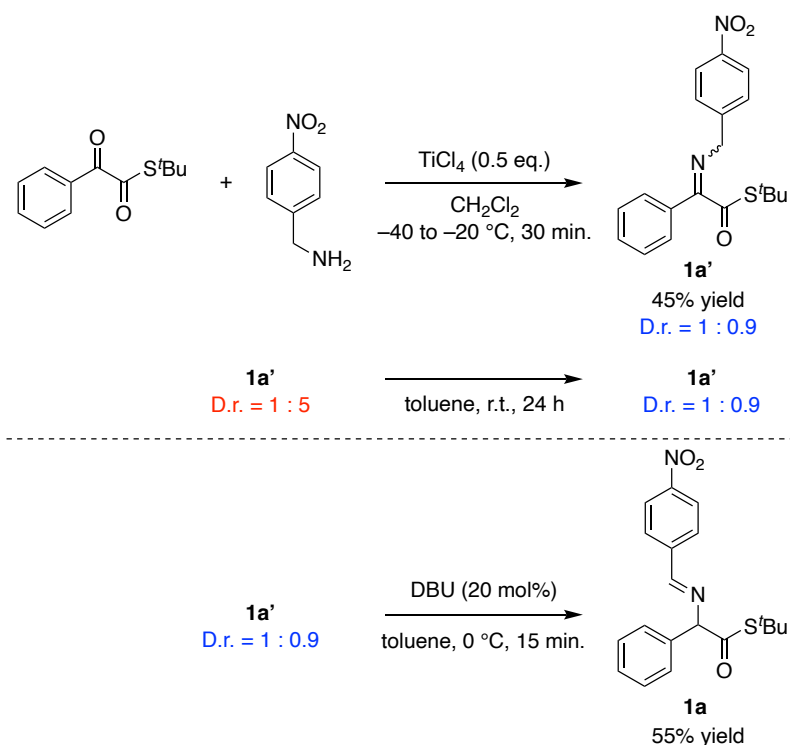

### 3. General procedure for the catalytic Michael addition reaction of aldimino thioester **1**

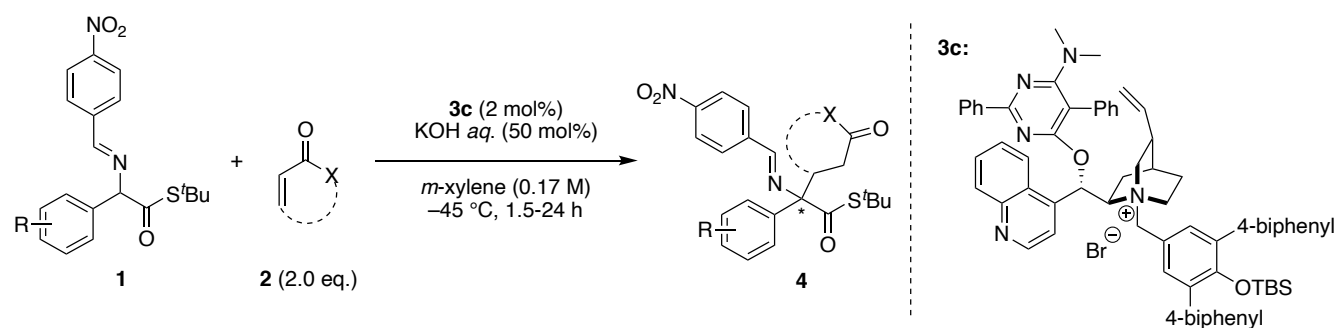

A solution of aldimino thioester **1** (1.0 eq.) and **3c** (2 mol%) in *m*-xylene (0.17 M) at  $-45$   $^\circ\text{C}$  was added enone (2.0 eq.) and followed by aqueous potassium hydroxide solution (50 wt%, 50 mol%). The reaction was stirred at the same temperature until the consumption of the substrate observed. The reaction was quenched by passing the short column (neutral Silica-gel, ethyl acetate) to give the crude product, which was purified by column chromatography (Silica-gel, hexane/ethyl acetate) to



give 4.

***S*-(*tert*-butyl) (*E*)-2-((4-nitrobenzylidene)amino)-5-oxo-2-phenylhexanethioate (4a)**

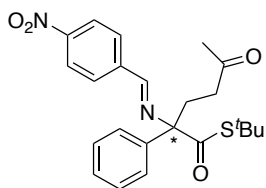

Orange oil, 18.5 mg, 0.043 mmol, 77%, 81% ee.

$^1\text{H-NMR}$  (400 MHz, CHLOROFORM- $\text{D}$ )  $\delta$  8.31-8.27 (m, 2H), 8.00 (s, 1H), 7.95-7.92 (m, 2H), 7.40-7.32 (m, 5H), 2.75-2.46 (m, 4H), 2.12 (s, 3H), 1.49 (s, 9H);  $^{13}\text{C-NMR}$  (101 MHz, CHLOROFORM- $\text{D}$ )  $\delta$  207.6, 204.2, 159.6, 149.4, 141.2, 140.1, 129.3, 128.8, 128.2, 127.5, 123.9, 79.6, 47.6, 38.0, 32.3, 30.2, 29.6.

IR (NaCl)  $\nu$  2962, 2922, 1717, 1676, 1524, 1346, 1166  $\text{cm}^{-1}$ .

HRMS (ESI $^+$  in MeCN) calcd for  $\text{C}_{23}\text{H}_{27}\text{O}_4\text{N}_2\text{S}$  (M+H) 427.1686 found 427.1683.

$[\alpha]_{\text{D}}^{20} = +71.94$  ( $c = 0.416$ ,  $\text{CHCl}_3$ ).

Enantiomeric excess was determined by HPLC (CHIRALPAK AD-H, hexane/2-propanol = 80/20, flow rate 0.7 mL/min, 25  $^{\circ}\text{C}$ , 254 nm) first peak:  $t_{\text{R}} = 11.0$  min, second peak:  $t_{\text{R}} = 13.4$  min.

***S*-(*tert*-butyl) (*E*)-2-((4-nitrobenzylidene)amino)-5-oxo-2-(*p*-tolyl)hexanethioate (4b)**

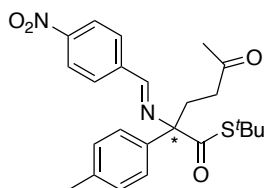

White oil, 55.7 mg, 0.13 mmol, 93%, 65% ee.

$^1\text{H-NMR}$  (400 MHz, CHLOROFORM- $\text{D}$ )  $\delta$  8.31-8.27 (m, 2H), 7.98 (s, 1H), 7.95-7.92 (m, 2H), 7.28-7.25 (m, 2H), 7.20-7.18 (m, 2H), 2.74-2.39 (m, 4H), 2.36 (s, 3H), 2.13 (s, 3H), 1.49 (s, 9H);  $^{13}\text{C-NMR}$  (101 MHz, CHLOROFORM- $\text{D}$ )  $\delta$  207.8, 204.5, 159.5, 149.2, 141.3, 138.0, 137.0, 129.4, 129.3, 127.3, 123.9, 79.3, 47.5, 37.9, 32.3, 30.2, 29.6, 21.1.

IR (NaCl)  $\nu$  2961, 2292, 1718, 1674, 1522, 1346, 1165  $\text{cm}^{-1}$ .

HRMS (ESI $^+$  in MeCN) calcd for  $\text{C}_{24}\text{H}_{29}\text{O}_4\text{N}_2\text{S}$  (M+H) 441.1843 found 441.1838.

$[\alpha]_{\text{D}}^{20} = +60.74$  ( $c = 0.410$ ,  $\text{CHCl}_3$ ).

Enantiomeric excess was determined by HPLC (CHIRALPAK AD-H, hexane/2-propanol = 80/20, flow rate 0.7 mL/min, 25  $^{\circ}\text{C}$ , 254 nm) first peak:  $t_{\text{R}} = 12.8$  min, second peak:  $t_{\text{R}} = 25.9$  min.

***S*-(*tert*-butyl) (*E*)-2-((4-nitrobenzylidene)amino)-5-oxo-2-(*m*-tolyl)hexanethioate (4c)**

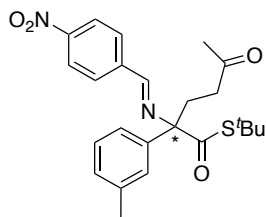

Orange oil, 58.2 mg, 0.13 mmol, 97%, 78% ee.

$^1\text{H-NMR}$  (400 MHz, CHLOROFORM-D)  $\delta$  8.31-8.27 (m, 2H), 7.97 (s, 1H), 7.94-7.93 (m, 2H), 7.29-7.25 (m, 1H), 7.20-7.14 (m, 3H), 2.75-2.39 (m, 4H), 2.36 (s, 3H), 2.13 (s, 3H), 1.50 (s, 9H);  $^{13}\text{C-NMR}$  (101 MHz, CHLOROFORM-D)  $\delta$  207.8, 204.5, 159.6, 149.2, 141.3, 140.0, 138.4, 129.3, 128.9, 128.6, 128.0, 124.5, 123.9, 79.4, 47.5, 37.9, 32.2, 30.2, 29.5, 21.6.

IR (NaCl)  $\nu$  2962, 2924, 1715, 1674, 1524, 1345, 1168  $\text{cm}^{-1}$ .

HRMS (ESI<sup>+</sup> in MeCN) calcd for C<sub>24</sub>H<sub>29</sub>O<sub>4</sub>N<sub>2</sub>S (M+H) 441.1843 found 441.1838.

$[\alpha]_{\text{D}}^{20} = +64.40$  ( $c = 0.470$ , CHCl<sub>3</sub>).

Enantiomeric excess was determined by HPLC (CHIRALPAK IA-3, hexane/ethanol = 98/2, flow rate 0.6 mL/min, 25 °C, 254 nm) first peak:  $t_{\text{R}} = 21.3$  min, second peak:  $t_{\text{R}} = 22.6$  min.

***S*-(*tert*-butyl) (*E*)-2-((4-nitrobenzylidene)amino)-5-oxo-2-(*o*-tolyl)hexanethioate (4d)**

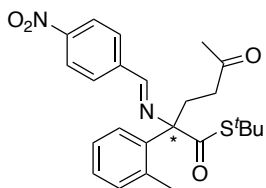

White oil, 50.9 mg, 0.12 mmol, 85%, 47% ee.

$^1\text{H-NMR}$  (400 MHz, CHLOROFORM-D)  $\delta$  8.29-8.26 (m, 2H), 7.94-7.91 (m, 2H), 7.83 (s, 1H), 7.56-7.52 (m, 1H), 7.34-7.28 (m, 2H), 7.20-7.16 (m, 1H), 2.71-2.35 (m, 4H), 2.14 (s, 3H), 2.11 (s, 3H), 1.52 (s, 9H);  $^{13}\text{C-NMR}$  (101 MHz, CHLOROFORM-D)  $\delta$  207.4, 204.8, 157.4, 149.2, 141.3, 138.0, 137.3, 132.3, 129.1, 128.5, 128.3, 125.7, 123.9, 80.0, 47.3, 38.3, 33.7, 30.3, 29.6, 22.0.

IR (NaCl)  $\nu$  2962, 1719, 1676, 1523, 1167, 851  $\text{cm}^{-1}$ .

HRMS (ESI<sup>+</sup> in MeCN) calcd for C<sub>24</sub>H<sub>29</sub>O<sub>4</sub>N<sub>2</sub>S (M+H) 441.1843 found 441.1837.

$[\alpha]_{\text{D}}^{20} = +29.97$  ( $c = 0.757$ , CHCl<sub>3</sub>).

Enantiomeric excess was determined by HPLC (CHIRALPAK IA-3, hexane/ethanol = 98/2, flow rate 0.6 mL/min, 25 °C, 254 nm) first peak:  $t_{\text{R}} = 22.4$  min, second peak:  $t_{\text{R}} = 27.1$  min.

***S*-(*tert*-butyl) (*E*)-2-(4-methoxyphenyl)-2-((4-nitrobenzylidene)amino)ethanethioate (4e)**

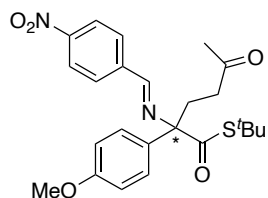

White oil, 18.4 mg, 0.040 mmol, 31%, 50% ee.

<sup>1</sup>H-NMR (400 MHz, CHLOROFORM-D)  $\delta$  8.30-8.27 (m, 2H), 7.98 (s, 1H), 7.95-7.92 (m, 2H), 7.32-7.29 (m, 2H), 6.93-6.89 (m, 2H), 3.82 (s, 3H), 2.73-2.40 (m, 4H), 2.13 (s, 3H), 1.49 (s, 9H); <sup>13</sup>C-NMR (101 MHz, CHLOROFORM-D)  $\delta$  207.8, 204.5, 159.4, 159.2, 149.2, 141.3, 132.0, 129.3, 128.7, 123.9, 114.0, 79.1, 55.2, 47.5, 38.0, 32.4, 30.3, 29.6.

IR (NaCl)  $\nu$  2960, 2924, 1717, 1673, 1522, 1346, 1253 cm<sup>-1</sup>.

HRMS (ESI<sup>+</sup> in MeCN) calcd for C<sub>24</sub>H<sub>29</sub>O<sub>5</sub>N<sub>2</sub>S (M+H) 457.1792 found 457.1785.

$[\alpha]_D^{20} = +46.78$  ( $c = 0.572$ , CHCl<sub>3</sub>).

Enantiomeric excess was determined by HPLC (CHIRALPAK IA, hexane/ethanol = 90/10, flow rate 0.7 mL/min, 25 °C, 254 nm) first peak:  $t_R = 16.6$  min, second peak:  $t_R = 18.8$  min.

***S*-(*tert*-butyl) (*E*)-2-(naphthalen-2-yl)-2-((4-nitrobenzylidene)amino)ethanethioate (4f)**

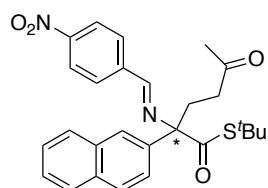

Yellow oil, 39.5 mg, 0.082 mmol, 93%, 65% ee.

<sup>1</sup>H-NMR (400 MHz, CHLOROFORM-D)  $\delta$  8.30-8.27 (m, 2H), 8.00 (s, 1H), 7.98 (d,  $J = 1.9$  Hz, 1H), 7.95-7.92 (m, 2H), 7.90-7.82 (m, 3H), 7.56-7.50 (m, 2H), 7.38 (dd,  $J = 8.7, 1.9$  Hz, 1H), 2.91-2.54 (m, 4H), 2.14 (s, 3H), 1.51 (s, 9H); <sup>13</sup>C-NMR (101 MHz, CHLOROFORM-D)  $\delta$  207.7, 204.3, 160.0, 149.3, 141.2, 137.4, 133.0, 132.8, 129.3, 128.7, 128.4, 127.5, 126.8, 126.7, 126.5, 125.1, 123.9, 79.6, 47.7, 37.9, 32.4, 30.3, 29.6.

IR (NaCl)  $\nu$  2959, 2922, 1718, 1674, 1522, 1345, 1165 cm<sup>-1</sup>.

HRMS (ESI<sup>+</sup> in MeCN) calcd for C<sub>27</sub>H<sub>29</sub>N<sub>2</sub>O<sub>4</sub>S (M+H) 477.1843 found 477.1834.

$[\alpha]_D^{20} = +73.72$  ( $c = 0.436$ , CHCl<sub>3</sub>).

Enantiomeric excess was determined by HPLC (CHIRALPAK IA, hexane/ethanol = 98/2, flow rate 0.7 mL/min, 25 °C, 254 nm) first peak:  $t_R = 28.6$  min, second peak:  $t_R = 31.4$  min.

***S*-(*tert*-butyl) (*E*)-2-(4-chlorophenyl)-2-((4-nitrobenzylidene)amino)-5-oxohexanethioate (4g)**

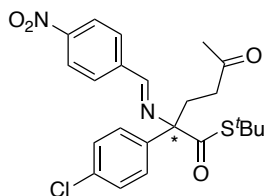

Yellow oil, 46.3 mg, 0.10 mmol, 80%, 69% ee.

<sup>1</sup>H-NMR (400 MHz, CHLOROFORM-D) δ 8.32-8.28 (m, 2H), 8.02 (s, 1H), 7.97-7.94 (m, 2H), 2.73-2.42 (m, 4H), 2.12 (s, 3H), 1.48 (s, 9H); <sup>13</sup>C-NMR (101 MHz, CHLOROFORM-D) δ 207.4, 203.7, 159.8, 149.4, 141.0, 138.8, 134.1, 129.3, 128.9, 128.9, 123.9, 79.0, 47.8, 37.7, 32.1, 30.2, 29.5.

IR (NaCl) ν 2961, 2900, 2361, 2339, 1717, 1522, 1345, 852 cm<sup>-1</sup>.

[α]<sub>D</sub><sup>20</sup> = +74.14 (c = 1.0, CHCl<sub>3</sub>).

HRMS (ESI<sup>+</sup> in MeCN) calcd for C<sub>23</sub>H<sub>26</sub>O<sub>4</sub>N<sub>2</sub>ClS (M+H) 461.1296 found 461.1290.

Enantiomeric excess was determined by HPLC (CHIRALPAK IA, hexane/ethanol = 98/2, flow rate 0.7 mL/min, 25 °C, 254 nm) first peak: t<sub>R</sub> = 25.7 min, second peak: t<sub>R</sub> = 33.2 min.

***S*-(*tert*-butyl) (*E*)-2-((4-nitrobenzylidene)amino)-5-oxo-2-(4-(trifluoromethyl)phenyl)hexanethioate (4h)**

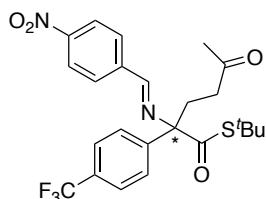

Yellow oil, 57.3 mg, 0.12 mmol, 86%, 40% ee.

<sup>1</sup>H-NMR (400 MHz, CHLOROFORM-D) δ 8.31-8.29 (m, 2H), 8.06 (s, 1H), 7.99-7.96 (m, 2H), 7.68-7.63 (m, 2H), 7.60-7.54 (m, 2H), 2.78-2.67 (m, 1H), 2.65-2.48 (m, 3H), 2.12 (s, 3H), 1.49 (s, 9H); <sup>13</sup>C-NMR (101 MHz, CHLOROFORM-D) δ 207.2, 203.4, 160.1, 149.4, 144.3, 140.9, 130.2 (q, J = 32.2 Hz), 129.3, 127.9, 125.6 (q, J = 3.8 Hz), 123.9, 123.8 (q, J = 270.2 Hz), 79.1, 47.9, 37.6, 32.0, 30.1, 29.5; <sup>19</sup>F-NMR (377 MHz, CHLOROFORM-D) δ -62.6.

IR (NaCl) ν 2964, 2360, 1717, 1674, 1524, 1346, 1326, 1125, 853 cm<sup>-1</sup>.

HRMS (ESI<sup>+</sup> in MeCN) calcd for C<sub>24</sub>H<sub>26</sub>O<sub>4</sub>N<sub>2</sub>F<sub>3</sub>S (M+H) 495.1560 found 495.1552.

[α]<sub>D</sub><sup>20</sup> = +32.61 (c = 1.0, CHCl<sub>3</sub>).

Enantiomeric excess was determined by HPLC (CHIRALPAK IA, hexane/ethanol = 98/2, flow rate 0.7 mL/min, 25 °C, 254 nm) first peak: t<sub>R</sub> = 23.1 min, second peak: t<sub>R</sub> = 31.9 min.

***S*-(*tert*-butyl) (*E*)-2-((4-nitrobenzylidene)amino)-5-oxo-2-phenylheptanethioate (4i)**

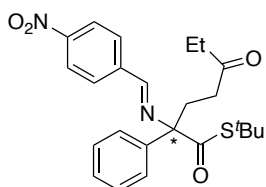

Orange oil, 39.2 mg, 0.089 mmol, 79%, 64% ee.

<sup>1</sup>H-NMR (400 MHz, CHLOROFORM-D)  $\delta$  8.30-8.27 (m, 2H), 7.99 (s, 1H), 7.95-7.92 (m, 2H), 7.40-7.32 (m, 5H), 2.77-2.48 (m, 4H), 2.41 (q,  $J = 7.3$  Hz, 2H), 1.49 (s, 9H), 0.97 (t,  $J = 7.3$  Hz, 3H); <sup>13</sup>C-NMR (101 MHz, CHLOROFORM-D)  $\delta$  210.4, 204.4, 159.6, 149.2, 141.3, 140.2, 129.3, 128.7, 128.1, 127.5, 123.9, 79.6, 47.5, 36.5, 36.2, 32.2, 29.6, 7.7.

IR (NaCl)  $\nu$  2966, 1715, 1675, 1524, 1346, 1111, 853  $\text{cm}^{-1}$ .

HRMS (ESI<sup>+</sup> in MeCN) calcd for C<sub>24</sub>H<sub>29</sub>O<sub>4</sub>N<sub>2</sub>S (M+H) 441.1843 found 441.1838.

$[\alpha]_{\text{D}}^{20} = +50.90$  ( $c = 0.456$ , CHCl<sub>3</sub>).

Enantiomeric excess was determined by HPLC (CHIRALPAK IA, hexane/ethanol = 98/2, flow rate 0.6 mL/min, 25 °C, 254 nm) first peak:  $t_{\text{R}} = 22.9$  min, second peak:  $t_{\text{R}} = 24.4$  min.

***S*-(*tert*-butyl) (*E*)-2-((4-nitrobenzylidene)amino)-2-(3-oxocyclopentyl)-2-phenylethanethioate (4j)**

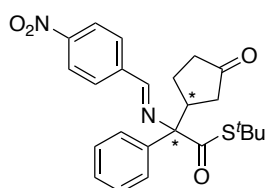

Yellow oil, 25.5 mg, 0.058 mmol, 58%, dr = 5 : 1, 11% ee for major diastereomer.

<sup>1</sup>H-NMR (400 MHz, CHLOROFORM-D)  $\delta$  8.33-8.28 (m, 2.38H), 8.11 (s, 0.16H), 8.03 (s, 1H), 7.98-7.92 (m, 2.44H), 7.45-7.31 (m, 6.44H), 3.54-3.46 (m, 1.03H), 3.44-3.36 (m, 0.18H), 2.62 (dd,  $J = 18.8, 9.2$  Hz, 0.16H), 2.53-2.44 (m, 1.15H), 2.31-2.13 (m, 4.56H), 2.03 (dd,  $J = 18.8, 9.2$  Hz, 1.02H), 1.48 (s, 9H), 1.46 (s, 1.43H); <sup>13</sup>C-NMR (101 MHz, CHLOROFORM-D)  $\delta$  217.6, 203.8, 160.6, 149.4, 140.9, 138.5, 129.4, 128.8, 128.3, 128.2, 124.0, 82.7, 47.9, 43.2, 40.7, 37.8, 29.6, 24.7 (Assigned only for major diastereomer).

IR (NaCl)  $\nu$  2963, 2925, 1741, 1673, 1523, 1346, 842, 752  $\text{cm}^{-1}$ .

HRMS (ESI<sup>+</sup> in MeCN) calcd for C<sub>24</sub>H<sub>27</sub>O<sub>4</sub>N<sub>2</sub>S (M+H) 439.1686 found 439.1683.

$[\alpha]_{\text{D}}^{20} = +6.76$  ( $c = 0.3$ , CHCl<sub>3</sub>).

Enantiomeric excess was determined by HPLC (CHIRALPAK IA, hexane/ethanol = 98/2, flow rate 0.7 mL/min, 25 °C, 254 nm) first peak:  $t_{\text{R}} = 33.7$  min, second peak:  $t_{\text{R}} = 52.5$  min.

**methyl 5-(*tert*-butylthio)-4-((4-nitrobenzyl)amino)-5-oxo-4-phenylpentanoate (4k)**

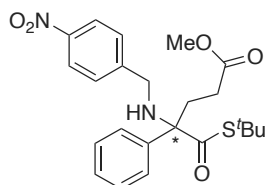

Yellow oil, 2.6 mg, 0.0058 mmol, 15%, Rac.

<sup>1</sup>H-NMR (400 MHz, CHLOROFORM-D)  $\delta$  8.26-8.21 (m, 2H), 7.62-7.56 (m, 2H), 7.46-7.43 (m, 2H), 7.39-7.35 (m, 2H), 7.33-7.29 (m, 1H), 3.77-3.64 (m, 2H), 3.59 (s, 3H), 2.63-2.55 (m, 1H), 2.46-2.39 (m, 1H), 2.33-2.25 (m, 2H), 2.17-2.09 (m, 1H), 1.45 (s, 9H); <sup>13</sup>C-NMR (101 MHz, CHLOROFORM-D)  $\delta$  204.0, 173.7, 147.6, 147.2, 140.0, 128.8, 128.6, 128.0, 126.3, 123.7, 73.2, 51.7, 48.2, 46.4, 29.8, 29.3, 28.3.

IR (NaCl)  $\nu$  3343, 2959, 1736, 1673, 1605, 1521, 1345, 1169, 853  $\text{cm}^{-1}$ .

HRMS (ESI<sup>+</sup> in MeCN) calcd for C<sub>23</sub>H<sub>29</sub>O<sub>5</sub>N<sub>2</sub>S (M+H) 445.1792 found 445.1786.

Enantiomeric excess was determined by HPLC (CHIRALPAK IA, hexane/ethanol = 98/2, flow rate 1.0 mL/min, 25 °C, 254 nm) first peak:  $t_R$  = 11.3 min, second peak:  $t_R$  = 12.3 min.

**methyl 5-((*tert*-butylthio)carbonyl)-2-(4-nitrophenyl)-5-phenylpyrrolidine-3-carboxylate (4k')**

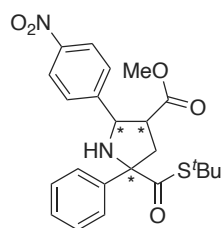

Yellow oil, 3.1 mg, 0.0070 mmol, 18%, Rac.

<sup>1</sup>H-NMR (400 MHz, CHLOROFORM-D)  $\delta$  8.23-8.18 (m, 2H), 7.66-7.63 (m, 2H), 7.55-7.51 (m, 2H), 7.43-7.39 (m, 2H), 7.36-7.32 (m, 1H), 4.77 (dd,  $J$  = 8.3, 6.7 Hz, 1H), 3.37-3.31 (m, 1H), 3.24 (s, 3H), 3.10 (d,  $J$  = 6.7 Hz, 1H), 3.01 (dd,  $J$  = 13.3, 8.3 Hz, 1H), 2.67 (dd,  $J$  = 13.3, 8.3 Hz, 1H), 1.46 (s, 9H); <sup>13</sup>C-NMR (101 MHz, CHLOROFORM-D)  $\delta$  203.3, 171.6, 148.1, 147.3, 141.6, 128.7, 128.4, 127.9, 125.7, 123.3, 77.3, 62.5, 51.5, 48.9, 47.5, 38.8, 29.7.

IR (NaCl)  $\nu$  3373, 2958, 2924, 2857, 1734, 1674, 1521, 1345, 852  $\text{cm}^{-1}$ .

HRMS (ESI<sup>+</sup> in MeCN) calcd for C<sub>23</sub>H<sub>27</sub>O<sub>5</sub>N<sub>2</sub>S (M+H) 443.1635 found 443.1631.

Enantiomeric excess was determined by HPLC (CHIRALPAK IB, hexane/ethanol = 9/1, flow rate 1.0 mL/min, 25 °C, 254 nm) first peak:  $t_R$  = 10.1 min, second peak:  $t_R$  = 13.3 min.

#### 4. Derivatisation of the product 4c

To a solution of **4c** (1.0 eq.) in EtOH (0.1 M) at 0 °C, NaBH<sub>3</sub>CN (2.0 eq) and followed by AcOH (5.0 eq.) were added. The reaction was stirred for 1 hour at the same temperature, which was quenched by the addition of saturated NaHCO<sub>3</sub> aq., extracted with CH<sub>2</sub>Cl<sub>2</sub>, dried over Na<sub>2</sub>SO<sub>4</sub> and filtered to give the crude **5**. The crude **5** was purified by column chromatography (Silica-gel, hexane/ethyl acetate) to give pure **5**.

#### *S*-(*tert*-butyl) 5-methyl-1-(4-nitrobenzyl)-2-(*m*-tolyl)pyrrolidine-2-carbothioate (**5**)

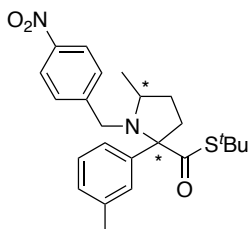

Yellow oil, 44.5 mg, 0.10 mmol, Quant., dr = 1.4 : 1

<sup>1</sup>H-NMR (400 MHz, CHLOROFORM-D) δ 8.10-8.05 (m, 4.8H), 7.50-7.46 (m, 2.8H), 7.45-7.41 (m, 2H), 7.24-7.05 (m, 9.6H), 4.12 (d, *J* = 16.6 Hz, 1H), 4.05 (d, *J* = 15.8 Hz, 1.4H), 3.90 (d, *J* = 16.6 Hz, 1H), 3.43 (d, *J* = 15.8 Hz, 1.4H), 3.37-3.33 (m, 1H), 3.28-3.18 (m, 1.4H), 2.63-2.57 (m, 2.4H), 2.47-2.34 (m, 2.4H), 2.322 (s, 4.2H), 2.317 (s, 3H), 2.22-2.09 (m, 2.4H), 1.69-1.55 (m, 2.4H), 1.53 (s, 9H), 1.52 (s, 12.6H), 0.93 (d, *J* = 6.2 Hz, 4.2H), 0.86 (d, *J* = 6.3 Hz, 3H); <sup>13</sup>C-NMR (101 MHz, CHLOROFORM-D) δ 207.9, 206.4, 150.2, 149.1, 146.6, 146.5, 140.6, 140.2, 137.62, 137.61, 129.1, 128.9, 128.7, 128.34, 128.33, 128.26, 128.02, 128.00, 125.3, 125.1, 123.04, 122.97, 82.4, 81.8, 60.0, 58.3, 53.7, 52.2, 48.2, 47.2, 37.8, 37.5, 32.2, 31.1, 29.8, 29.6, 21.7, 21.6, 21.2, 20.9.

IR (NaCl) ν 2961, 2926, 2367, 1670, 1604, 1519, 1344, 758 cm<sup>-1</sup>.

HRMS (ESI<sup>+</sup> in MeCN) calcd for C<sub>24</sub>H<sub>31</sub>O<sub>3</sub>N<sub>2</sub>S (M+H) 427.2050 found 427.2038.

[α]<sub>D</sub><sup>20</sup> = -48.32 (*c* = 0.9, CHCl<sub>3</sub>).

#### References

1. L. Deng *et al.* *Nature* **2015**, 523, 445.
2. Y. Yoshida *et al.* *Chem. Eur. J.* **2017**, 23, 12749.
3. Y. Yoshida *et al.* *Adv. Synth. Catal.* **2018**, 360, 4142.
4. C. T. Chen *et al.* *J. Org. Chem.* **2007**, 72, 8175.

5. <sup>1</sup>H-, <sup>13</sup>C-, and <sup>19</sup>F-NMR spectra and HPLC charts.

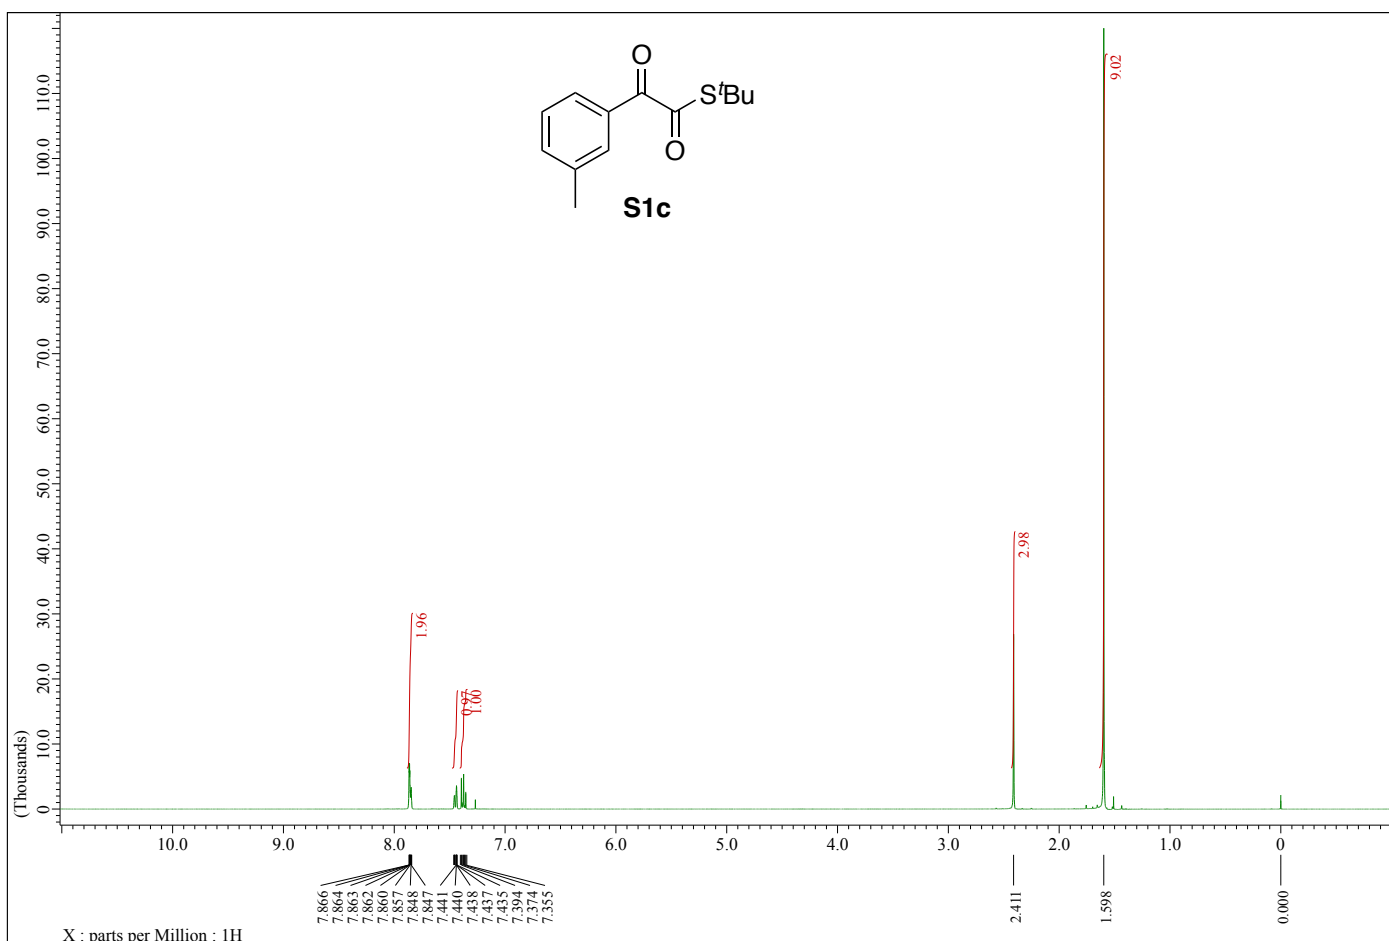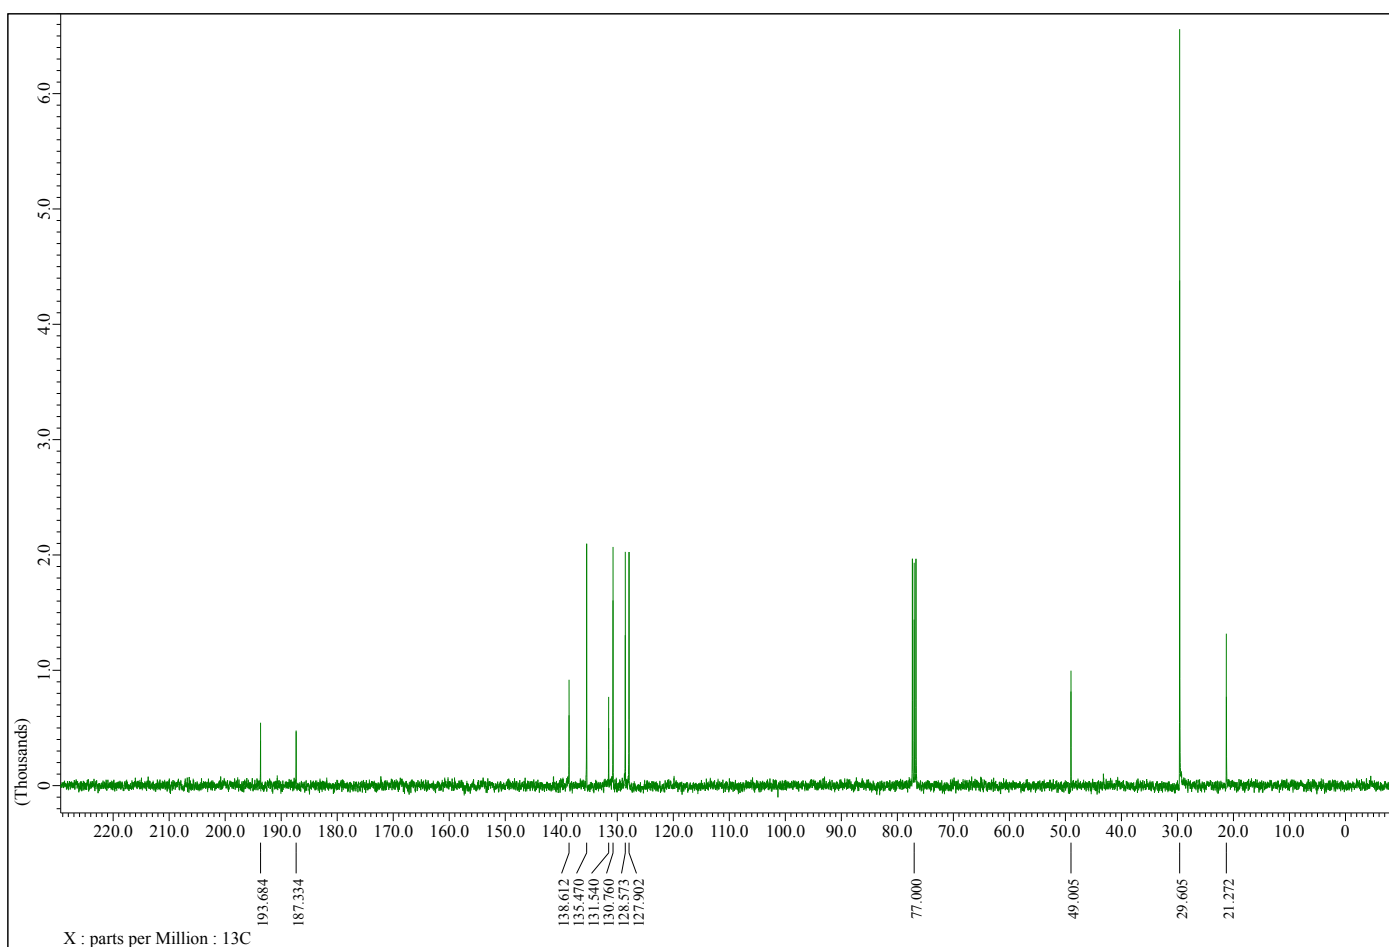



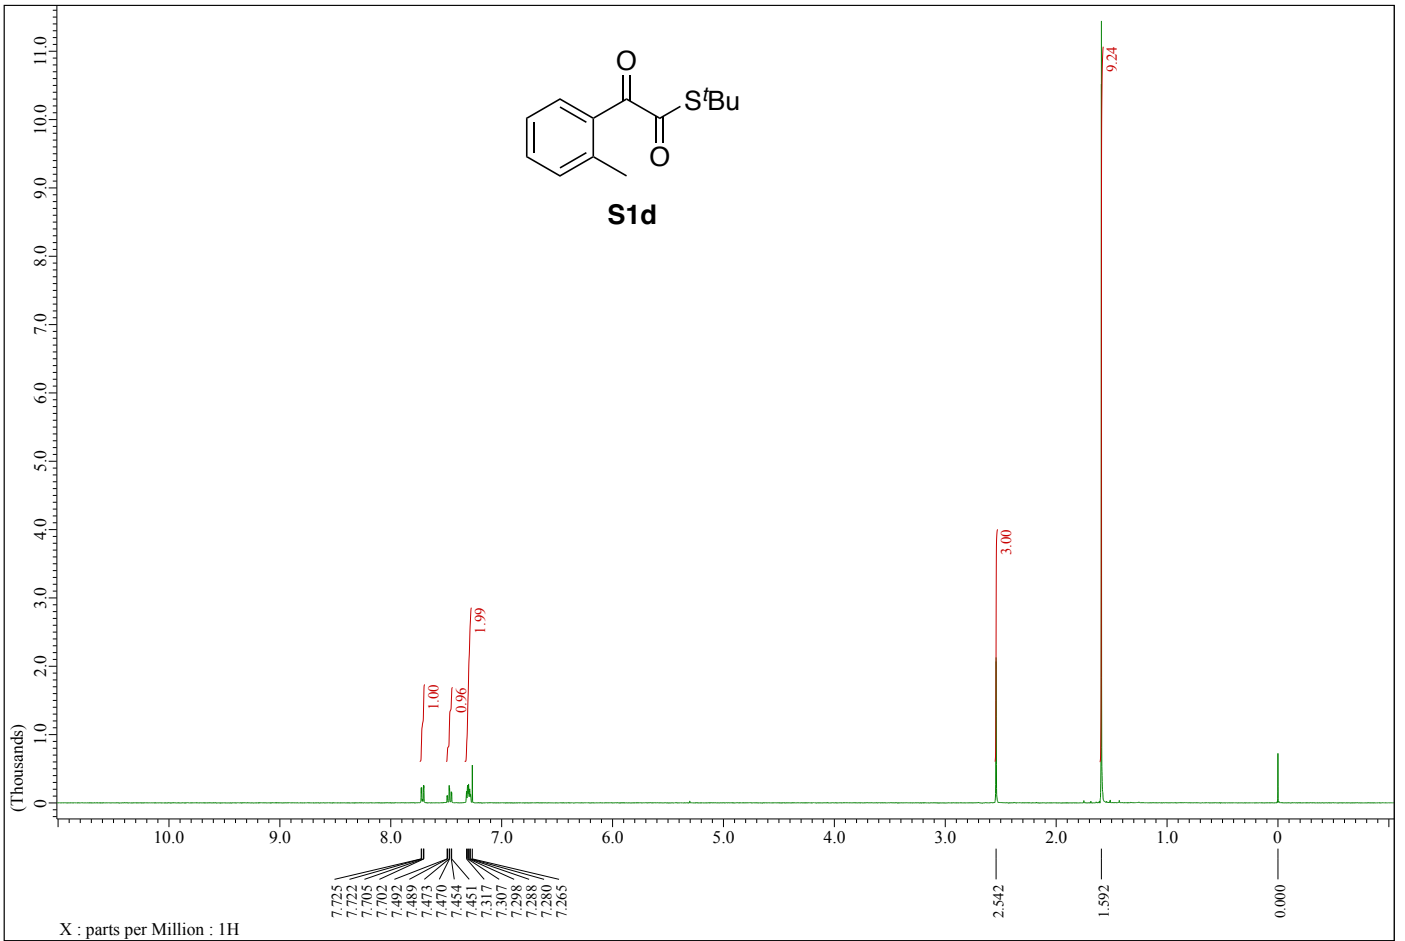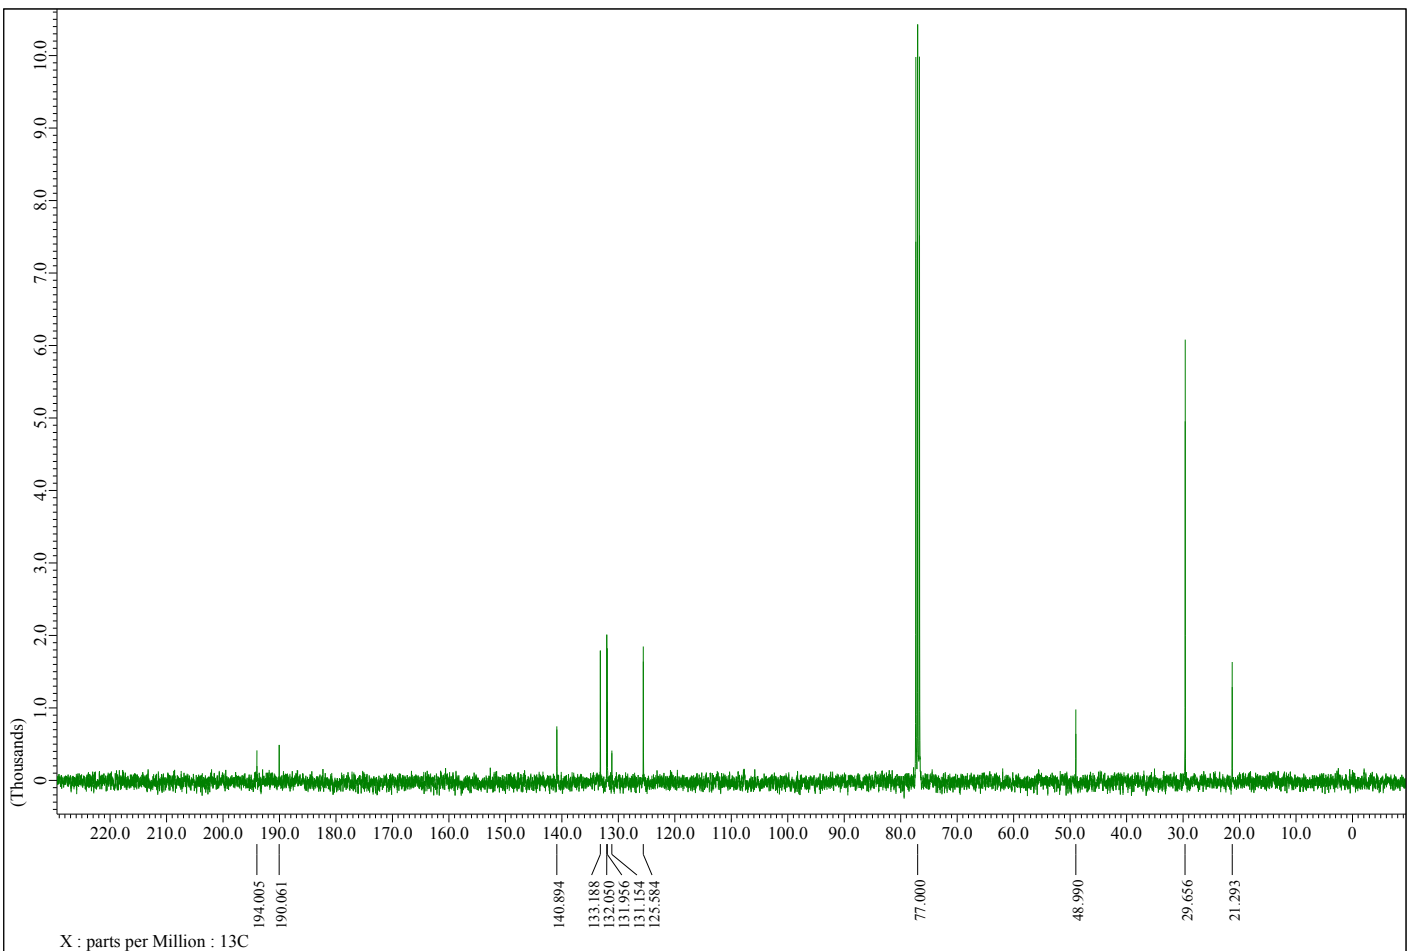

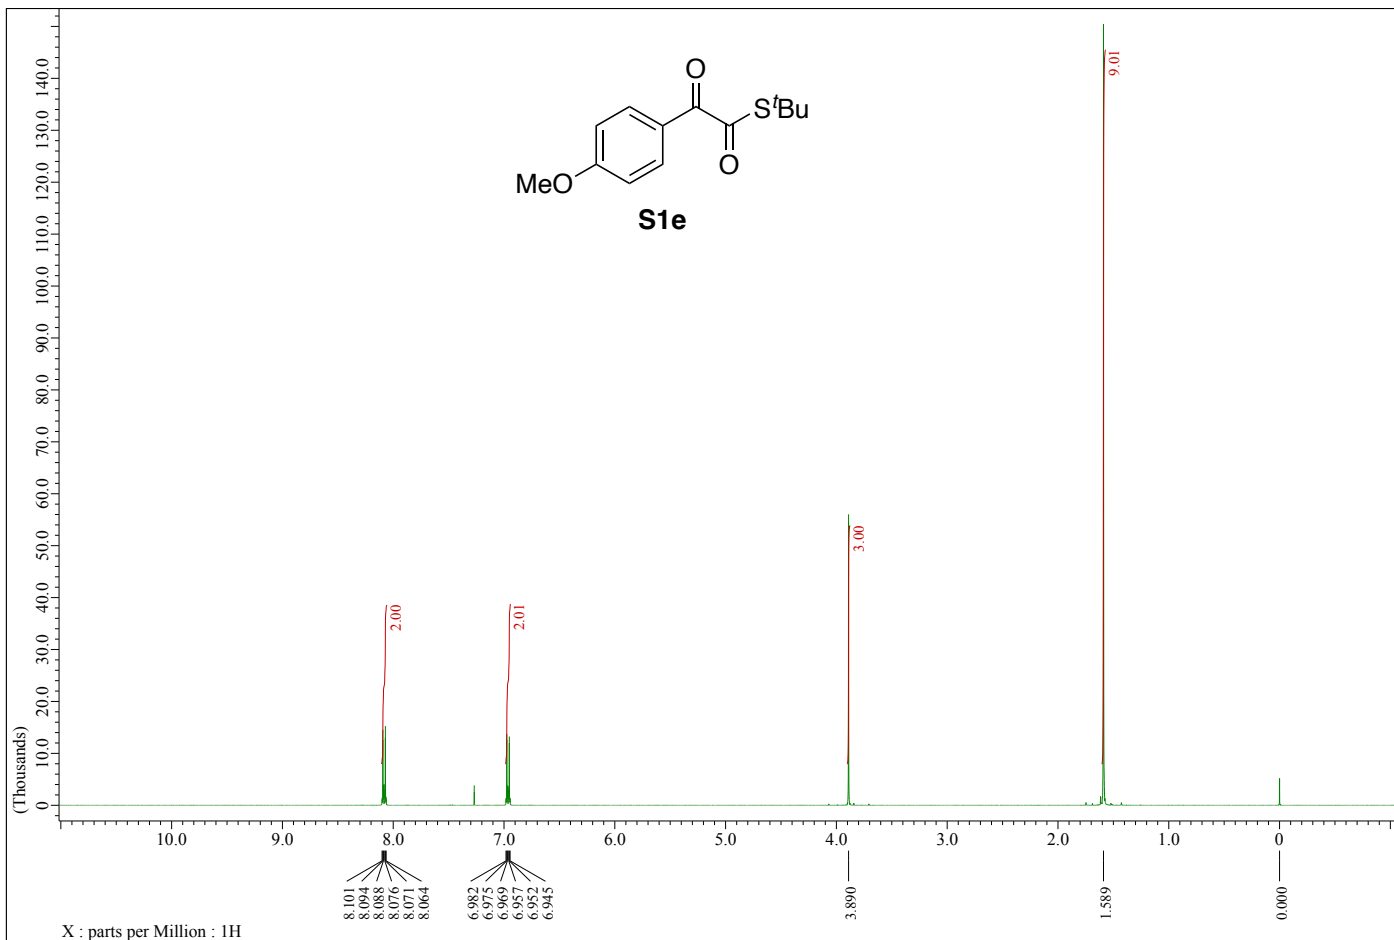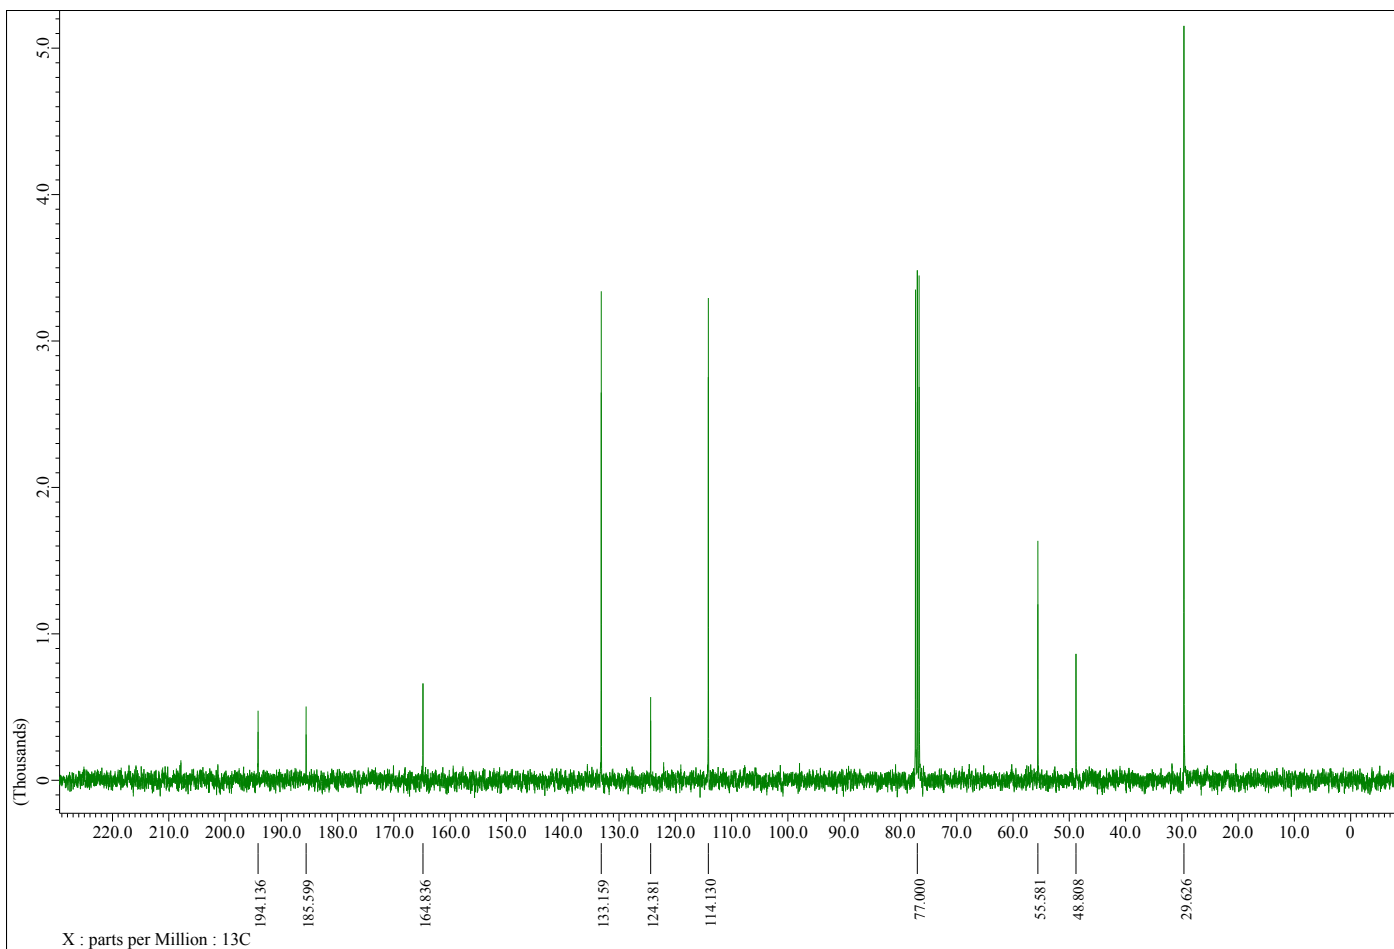

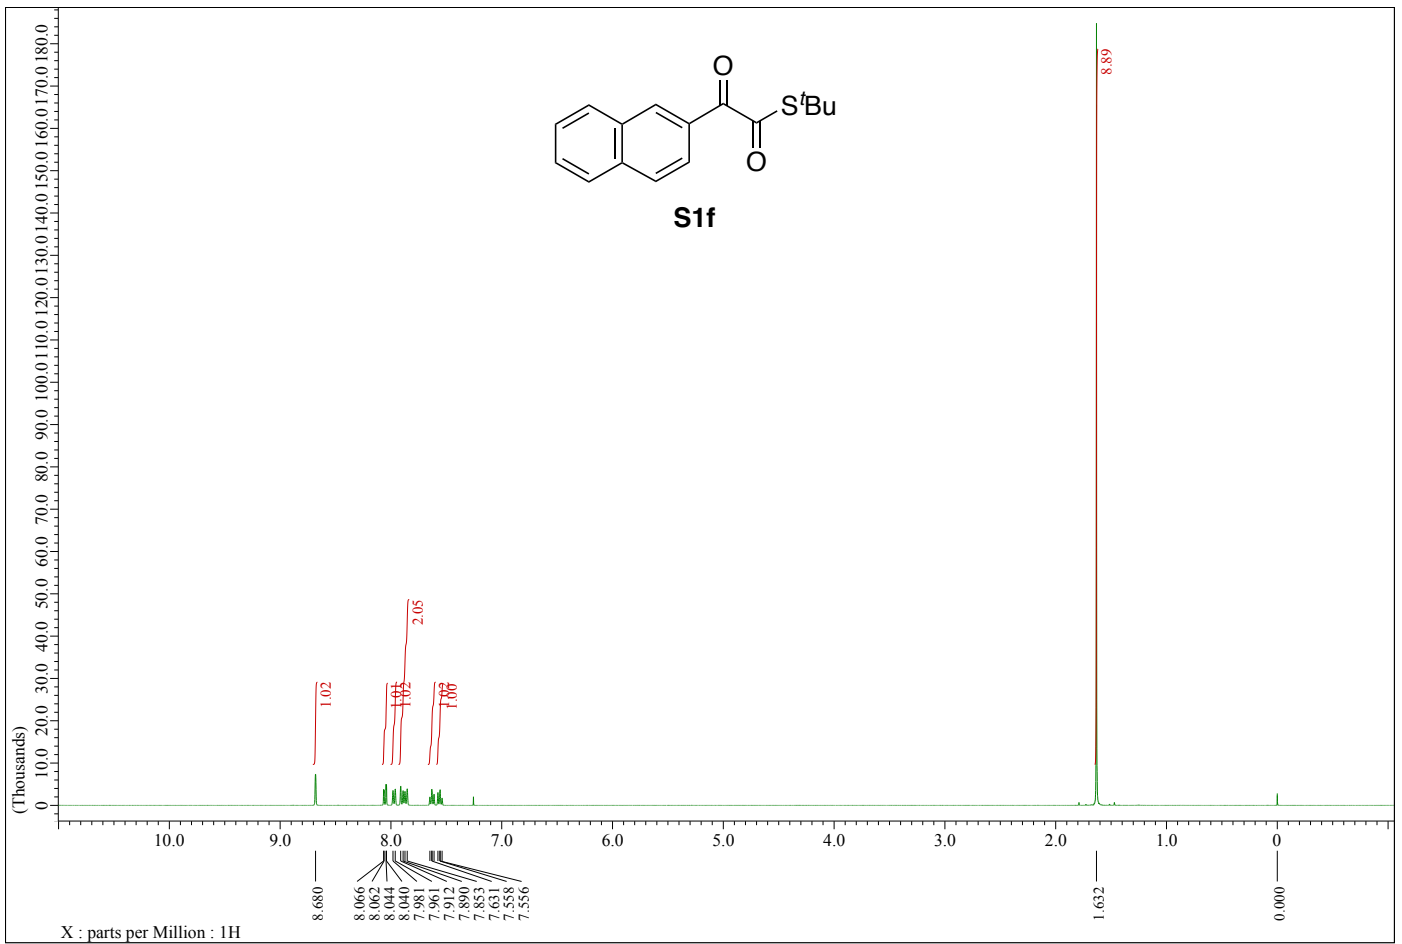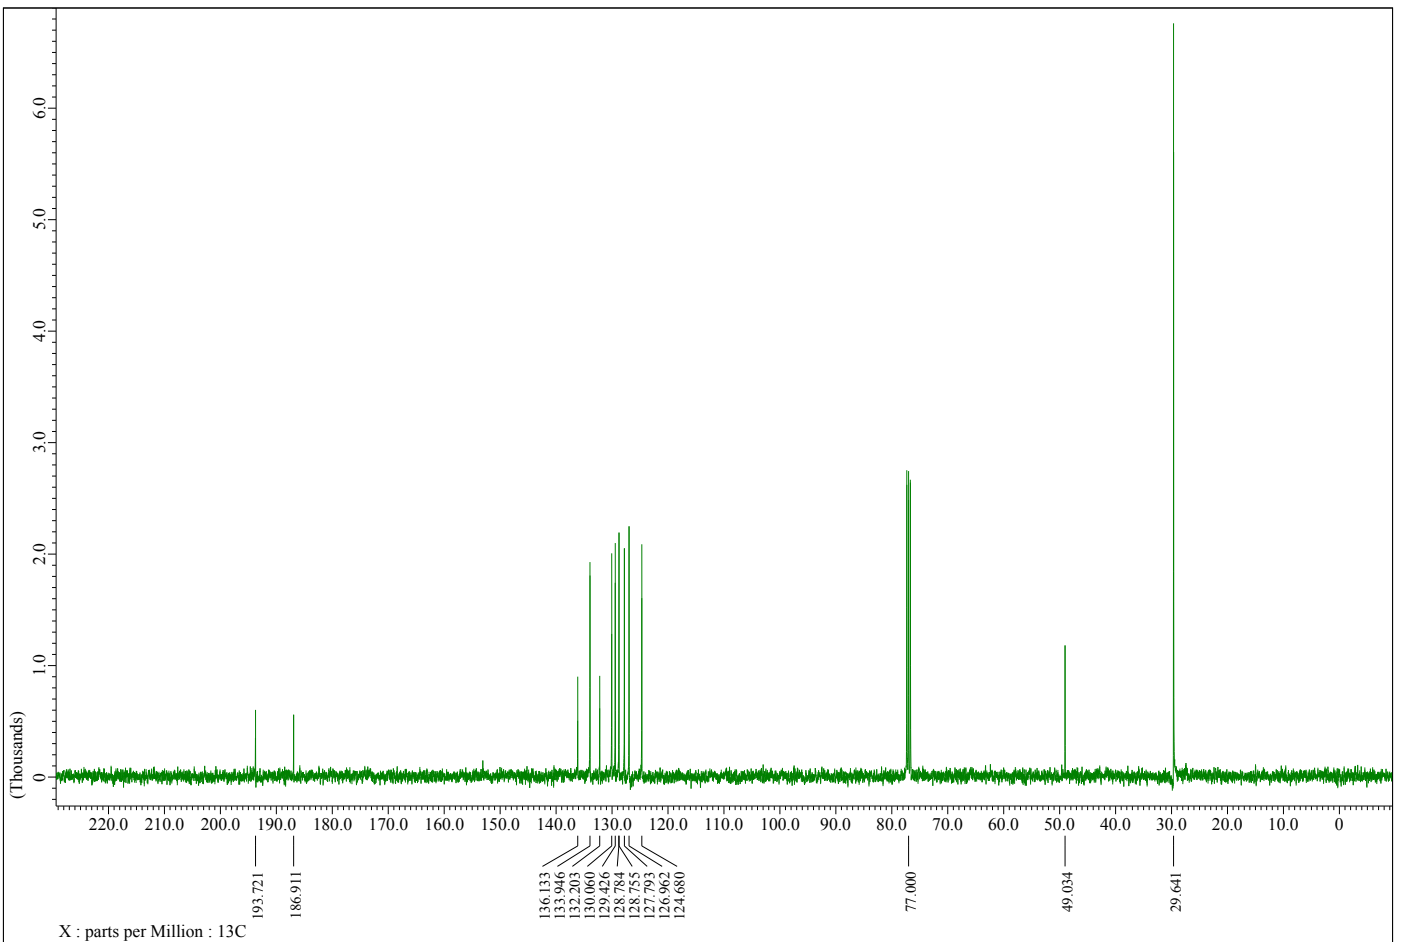

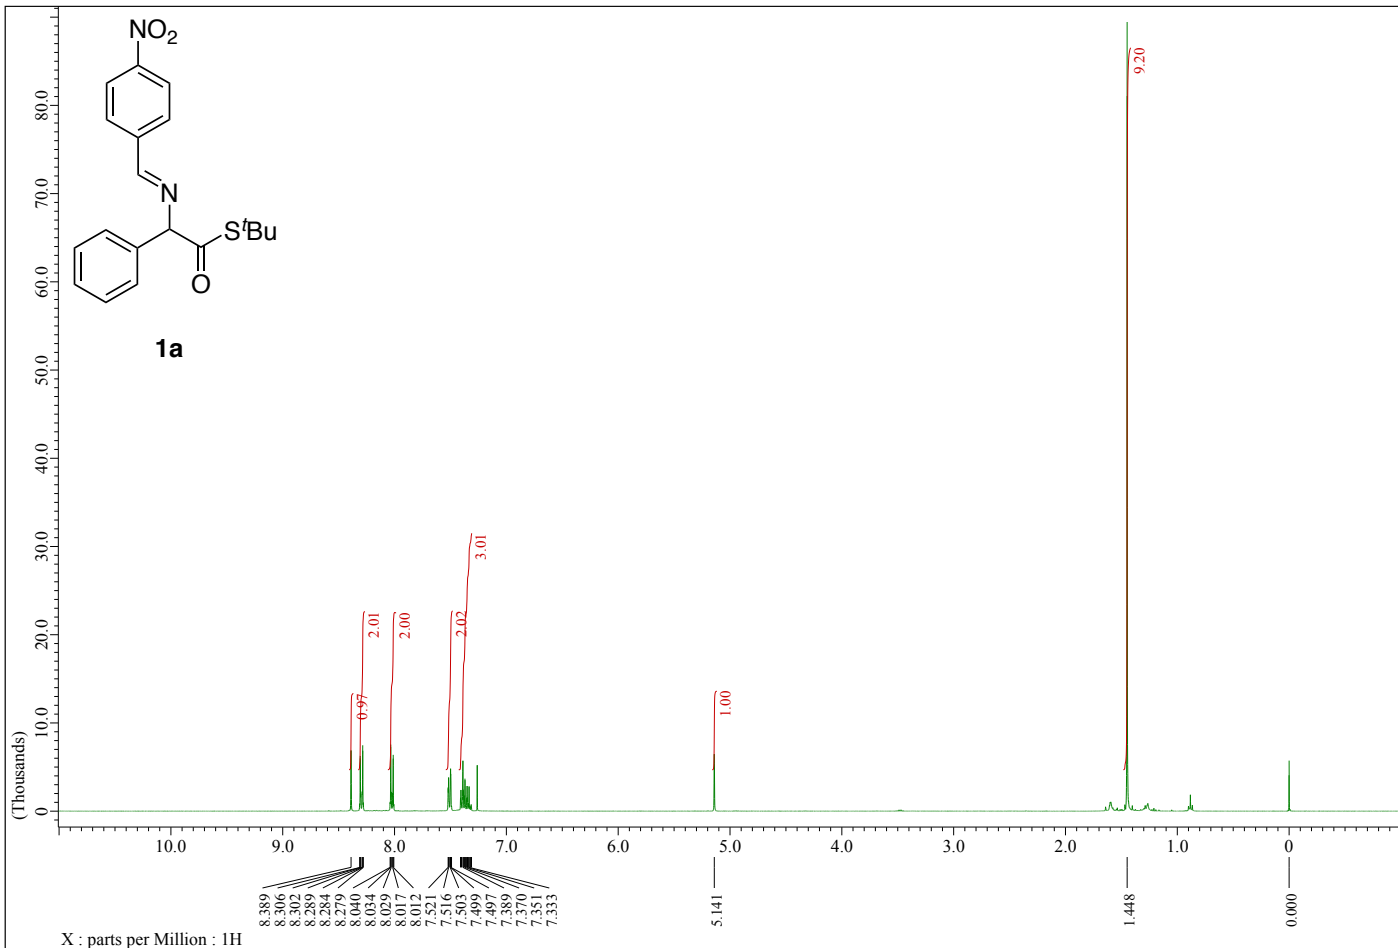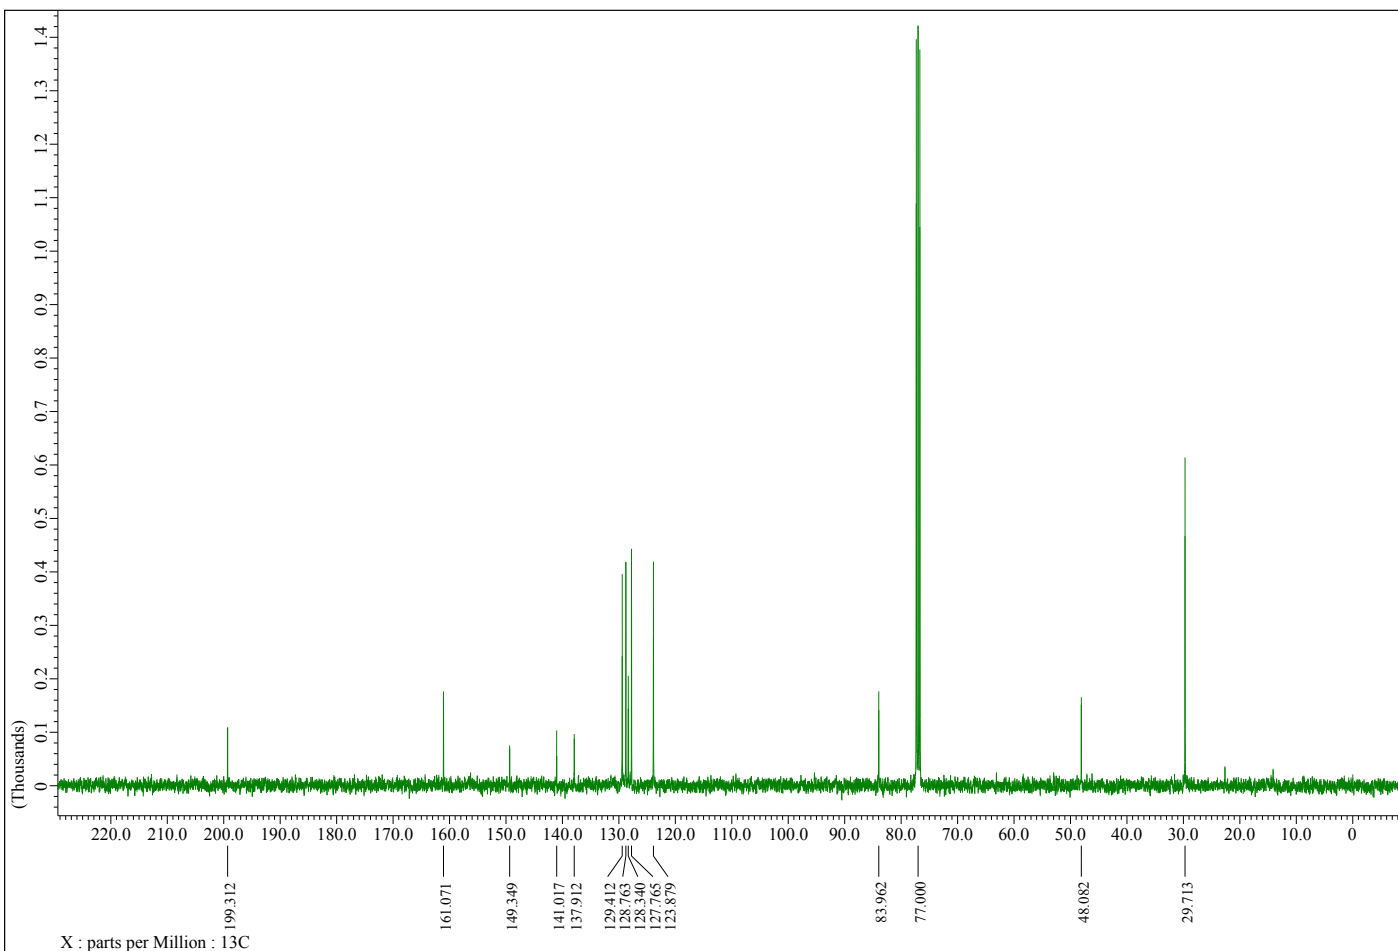

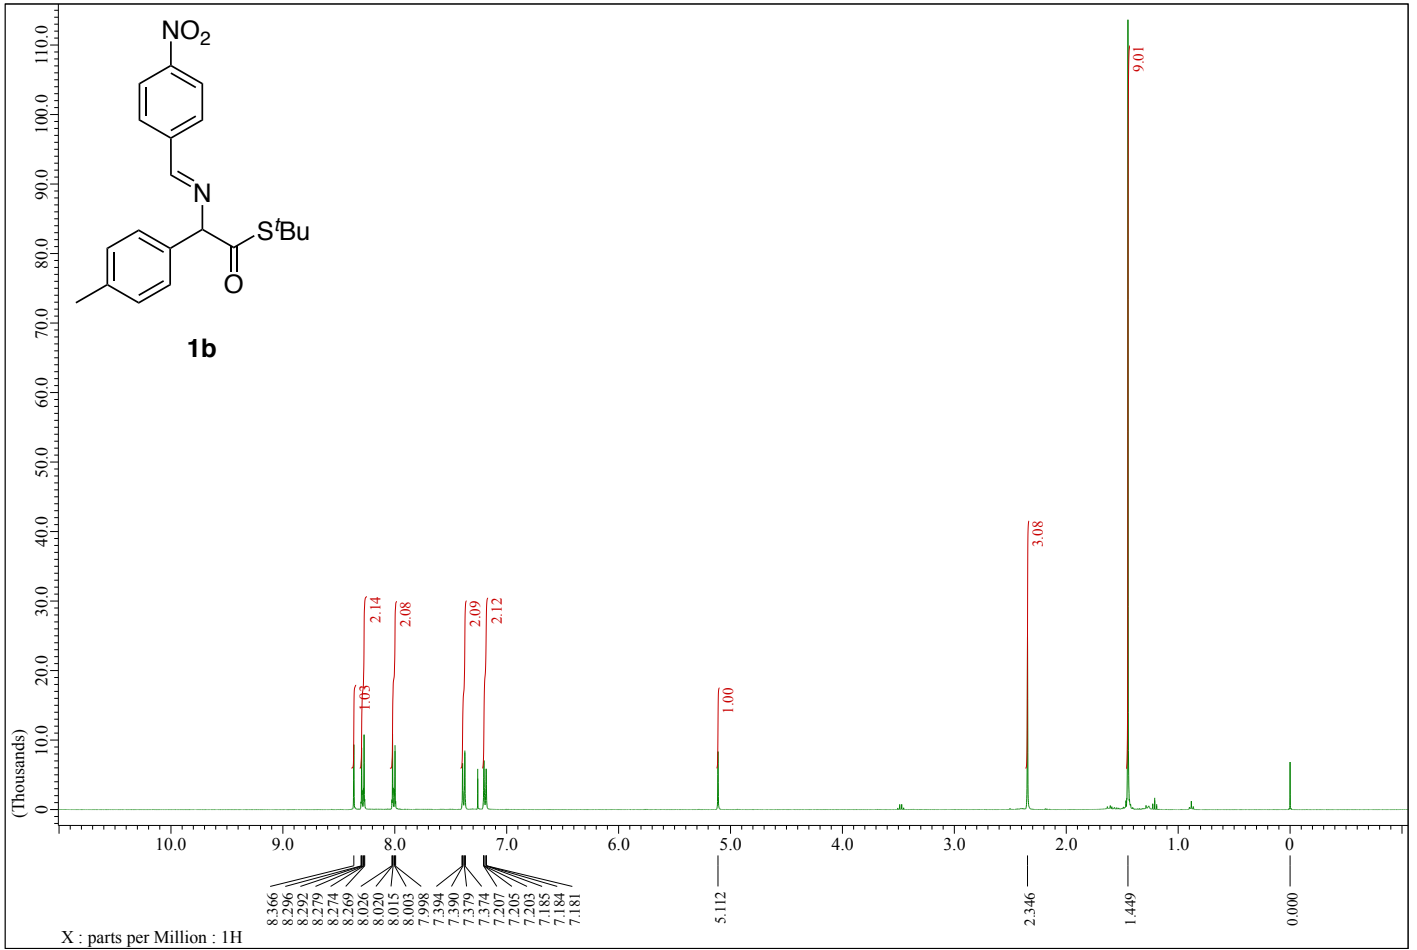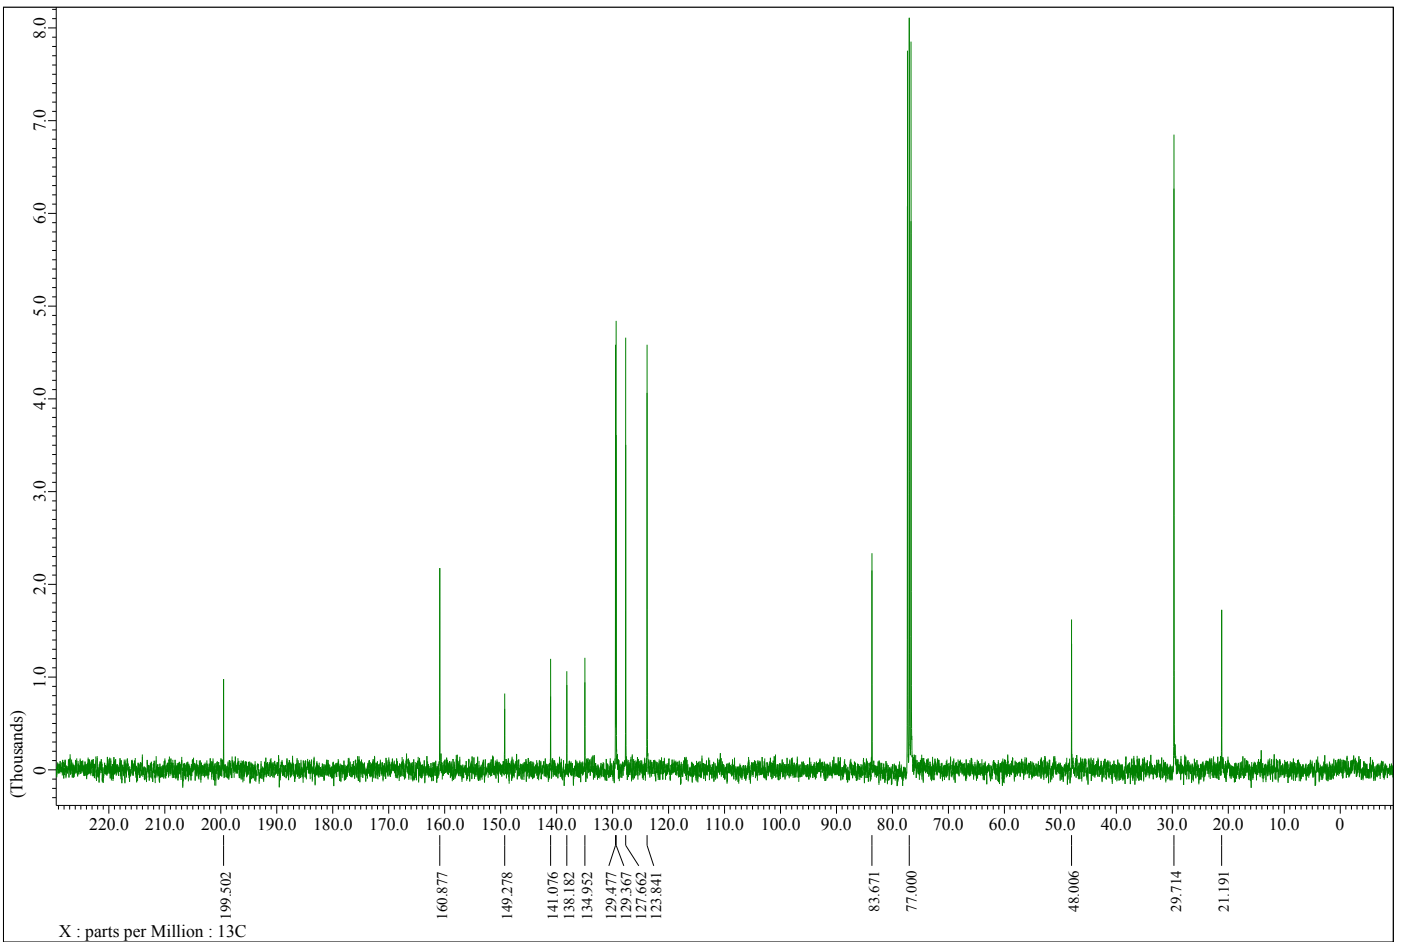

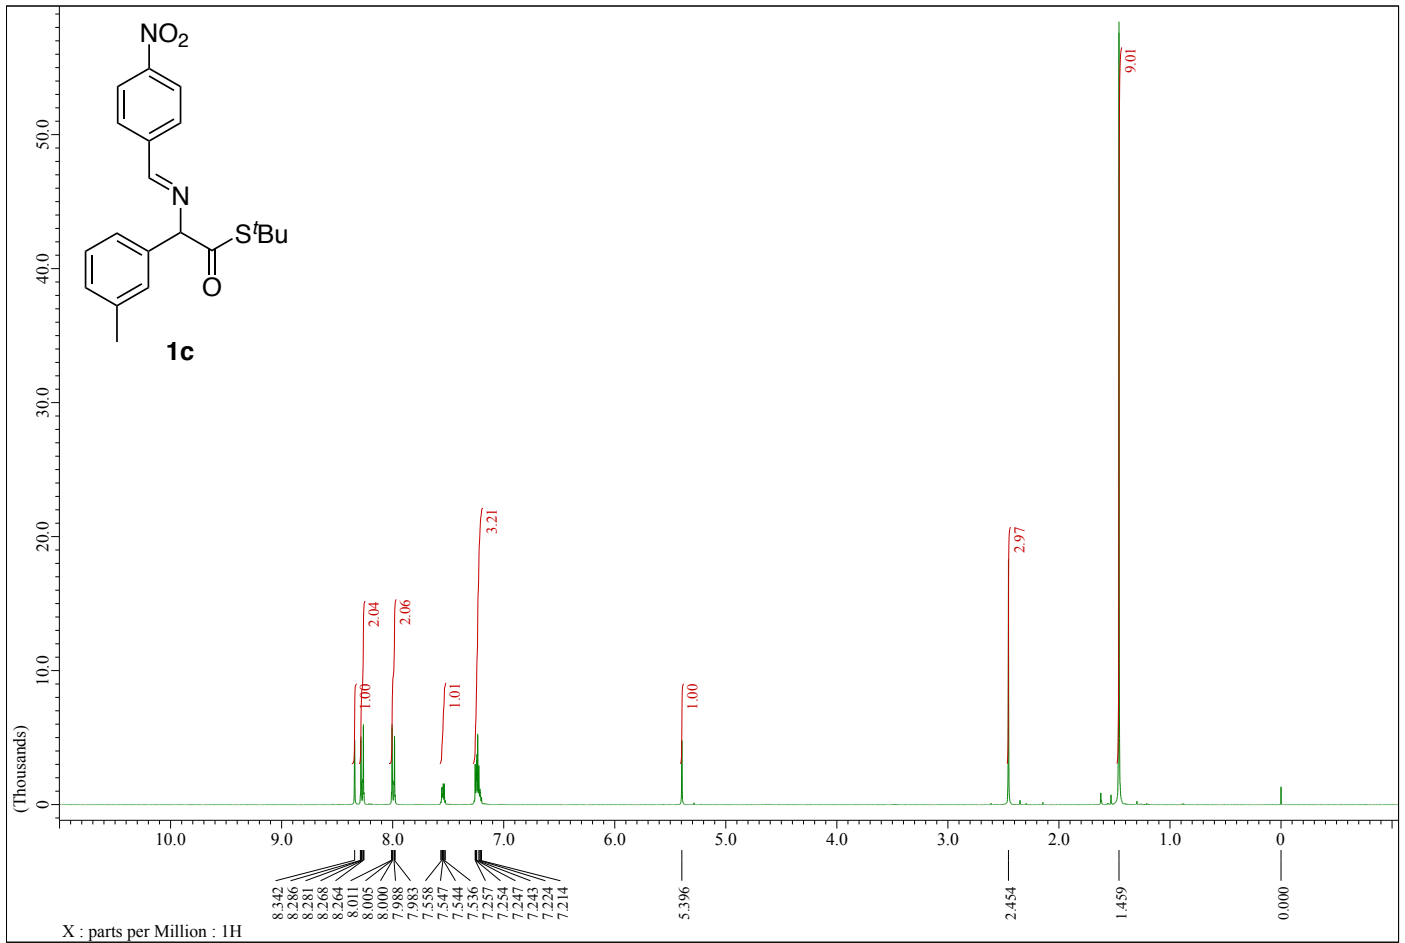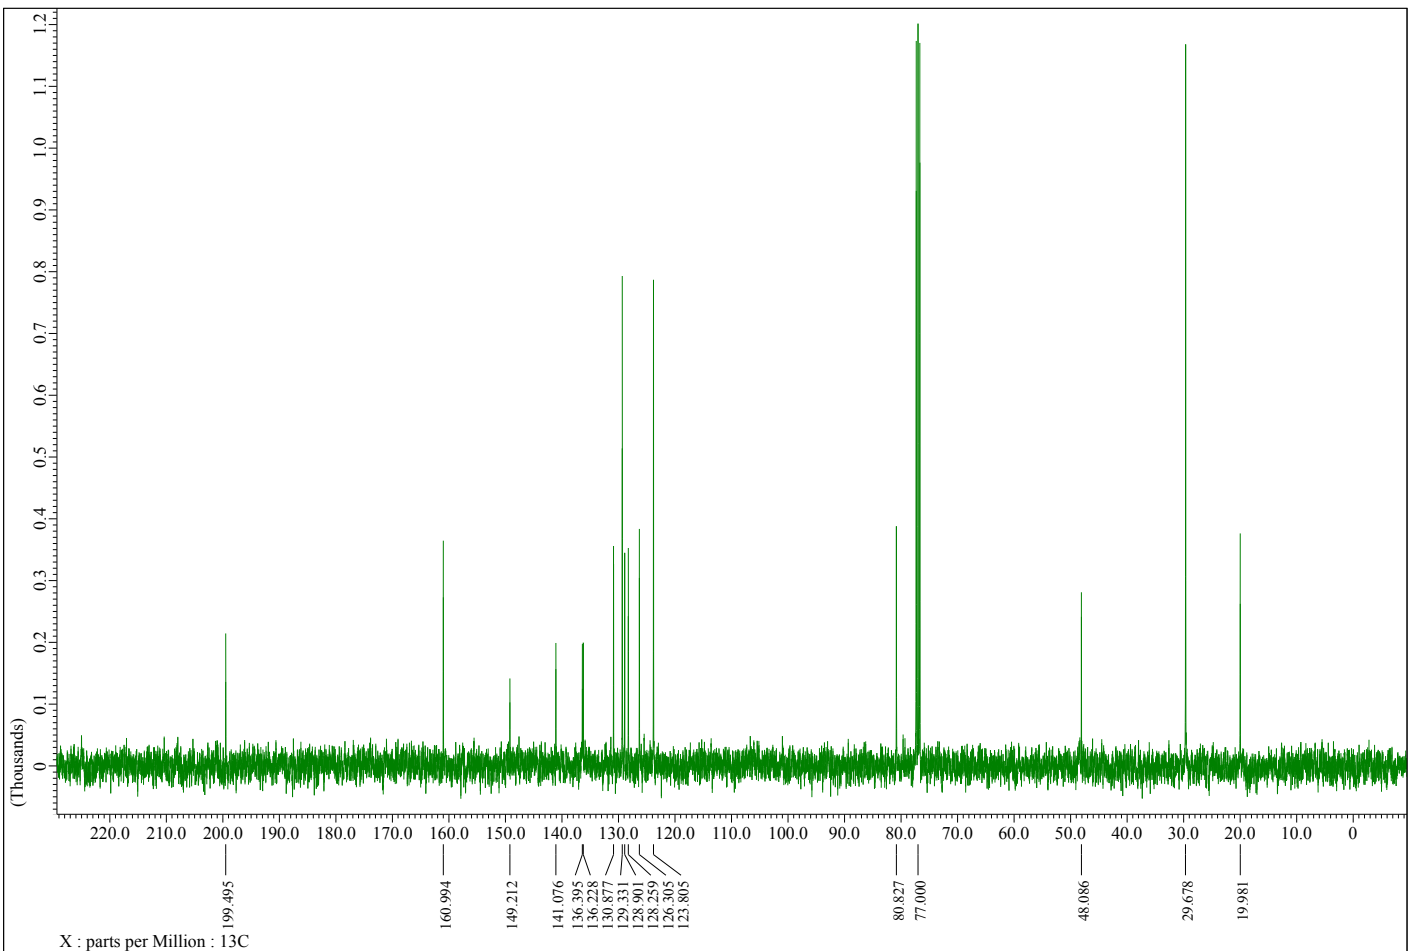

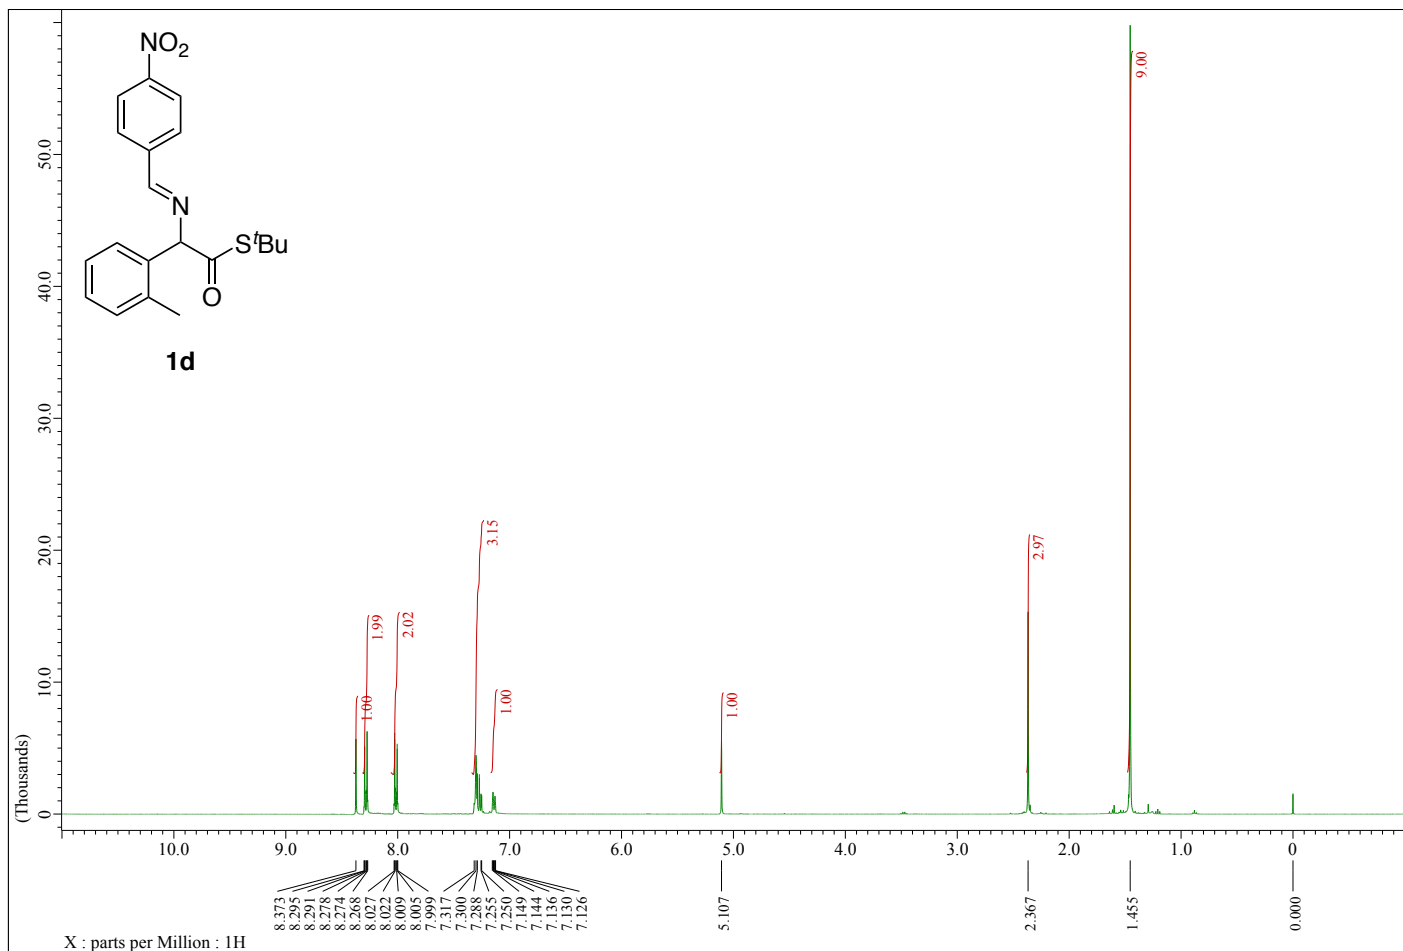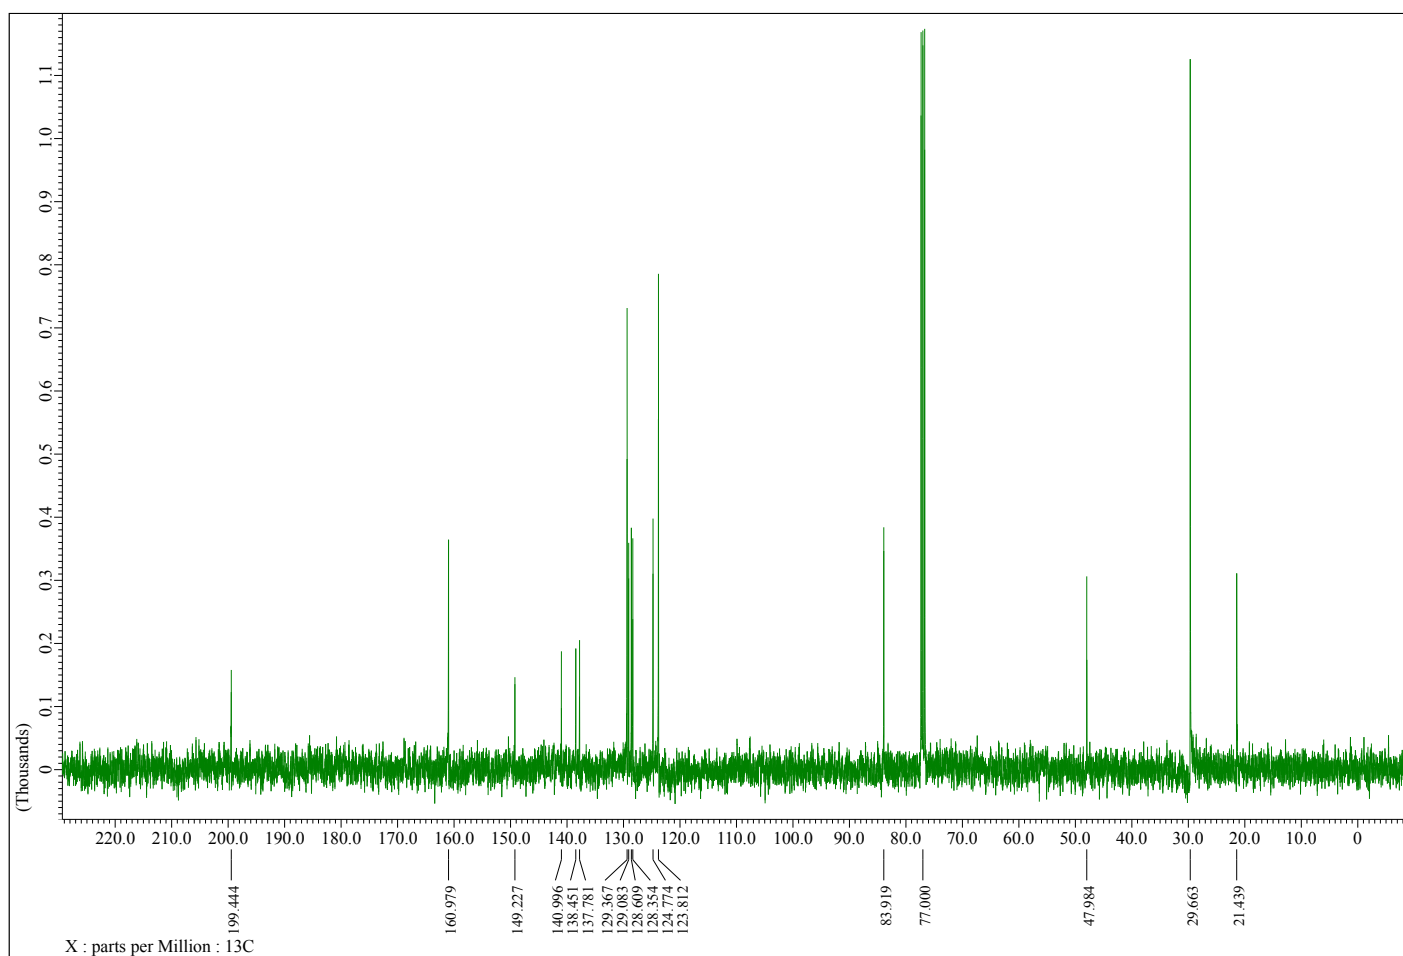

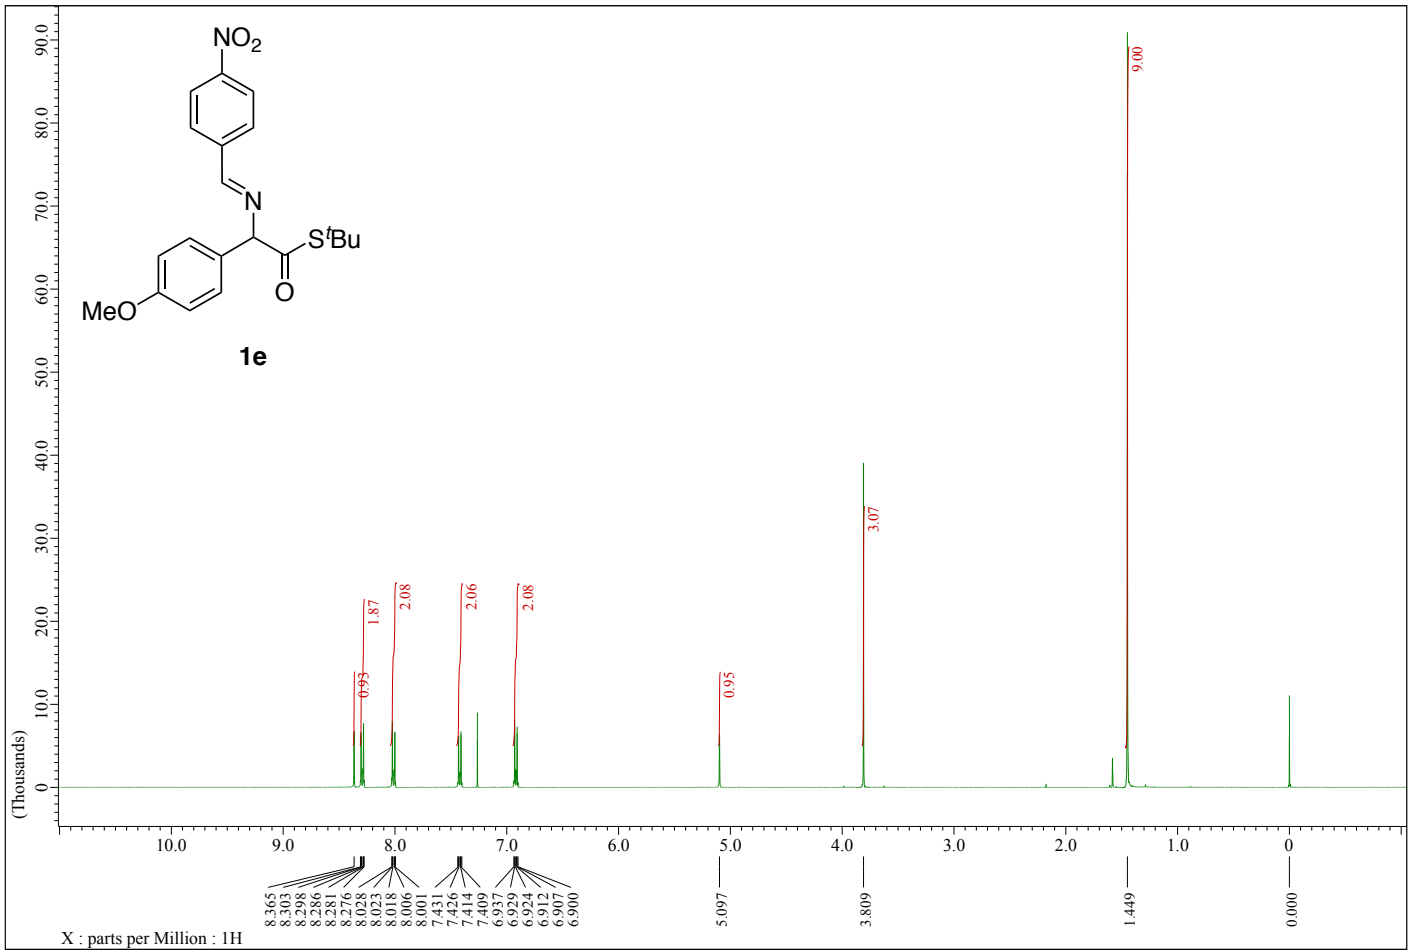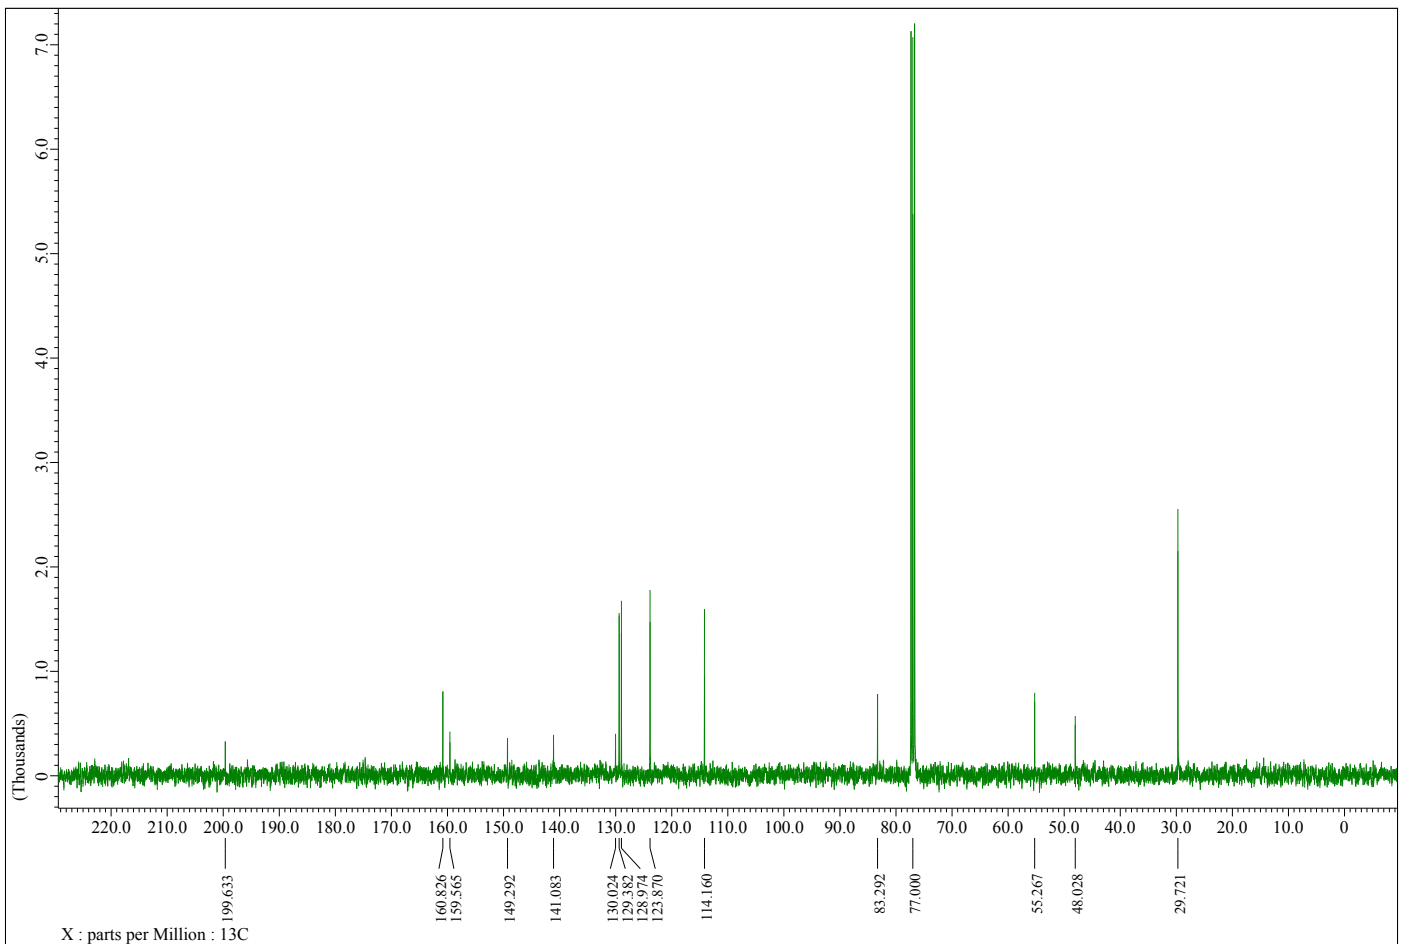



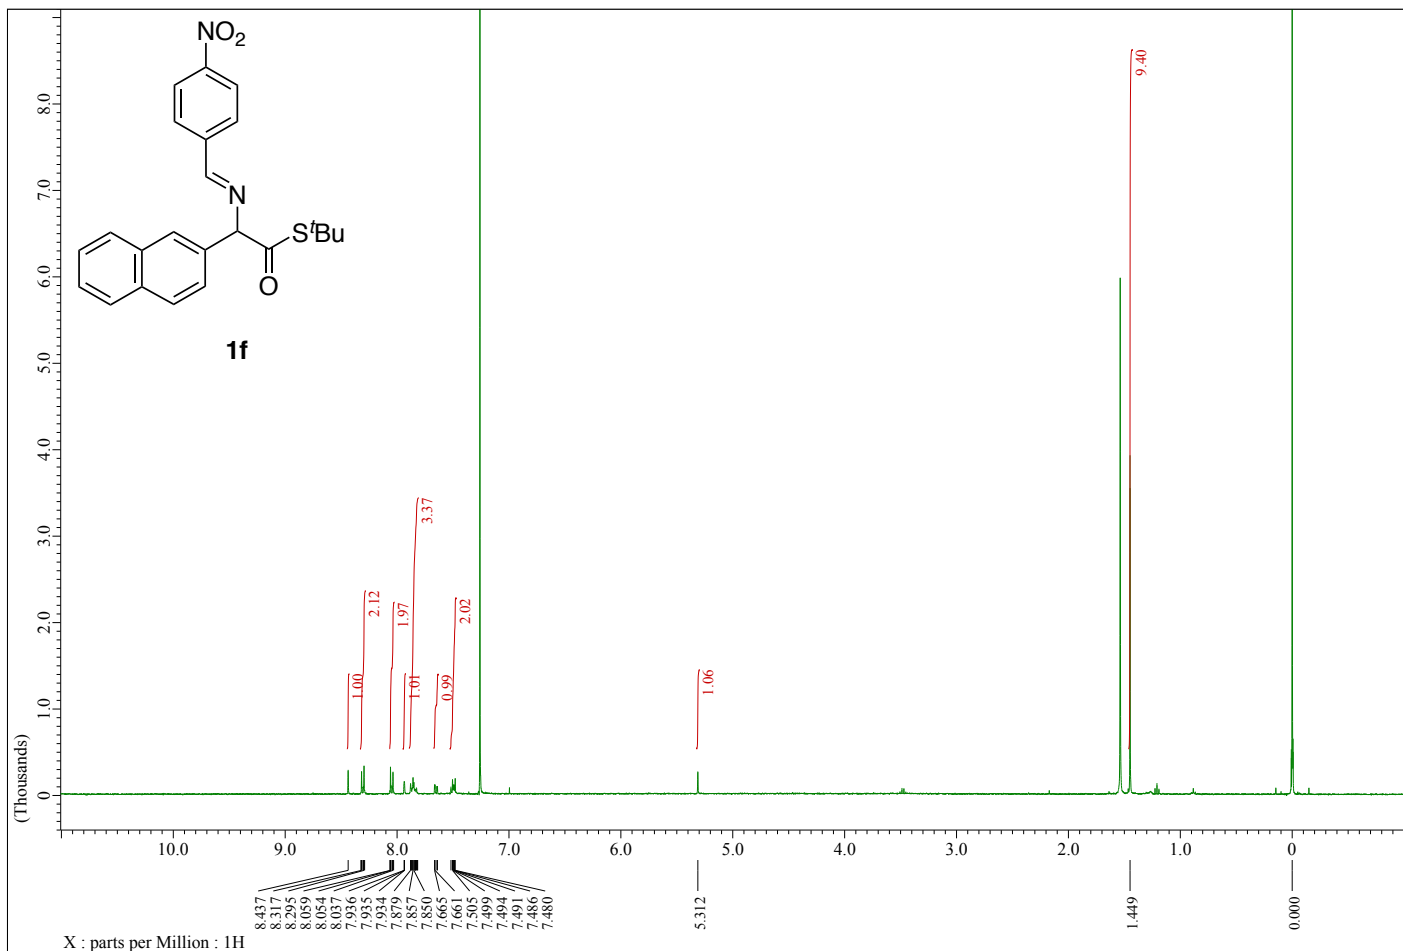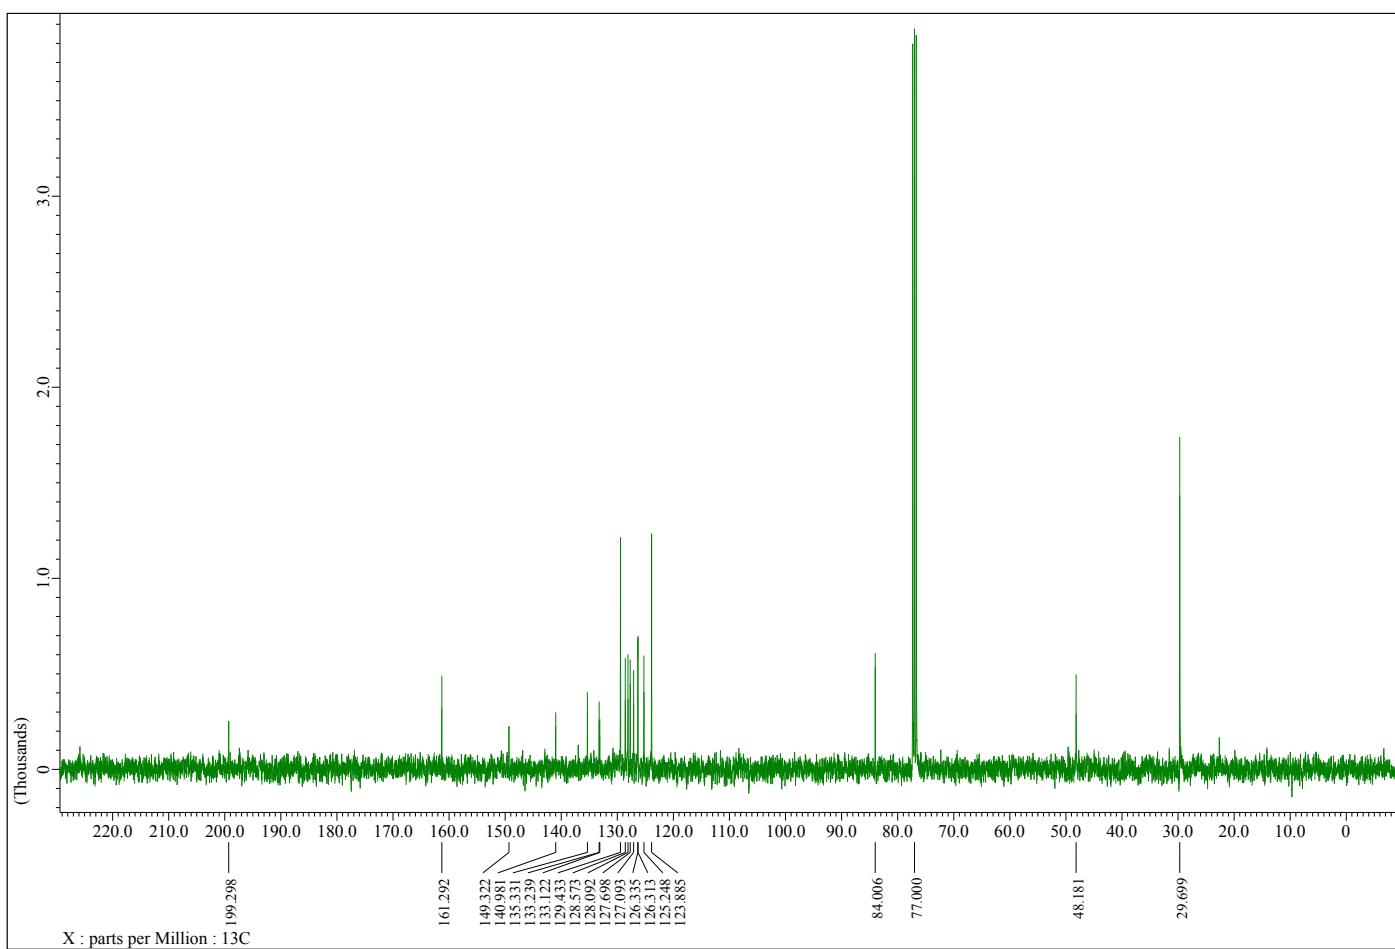

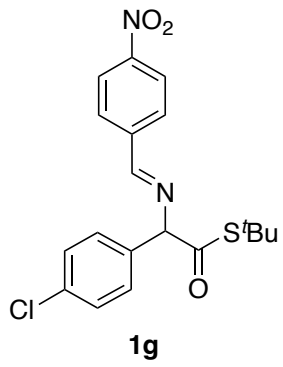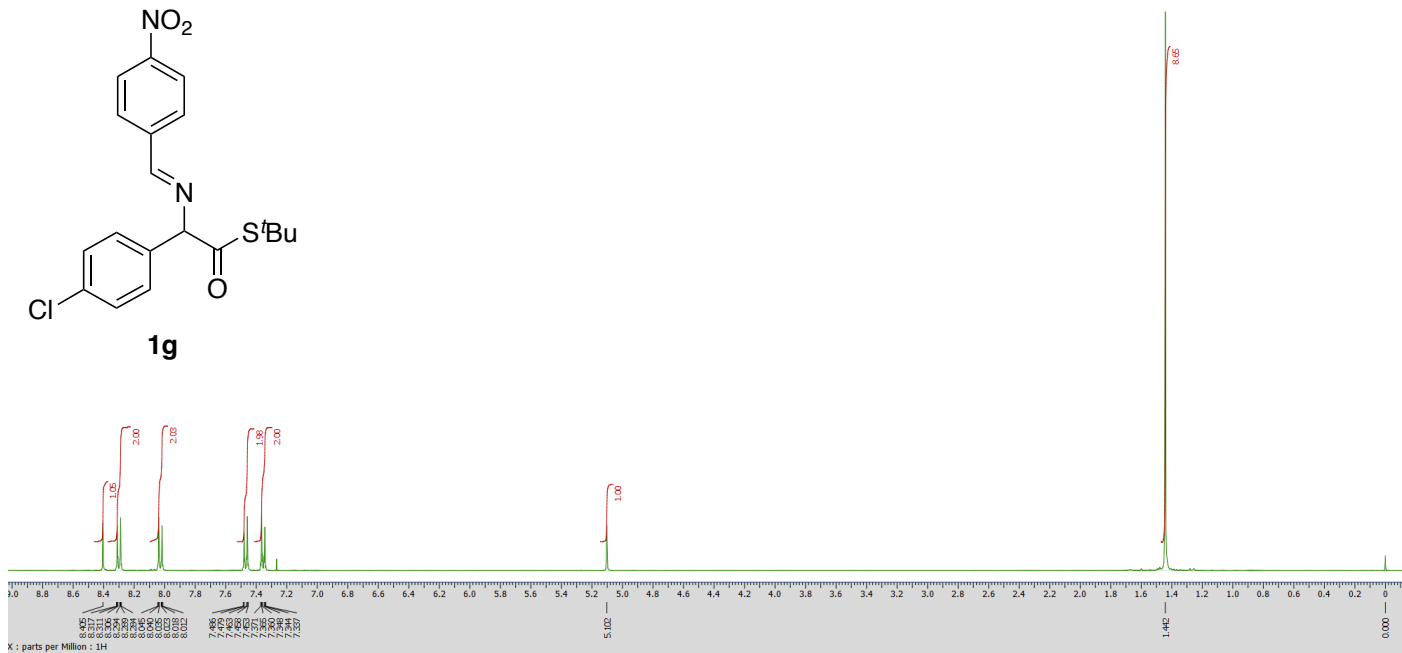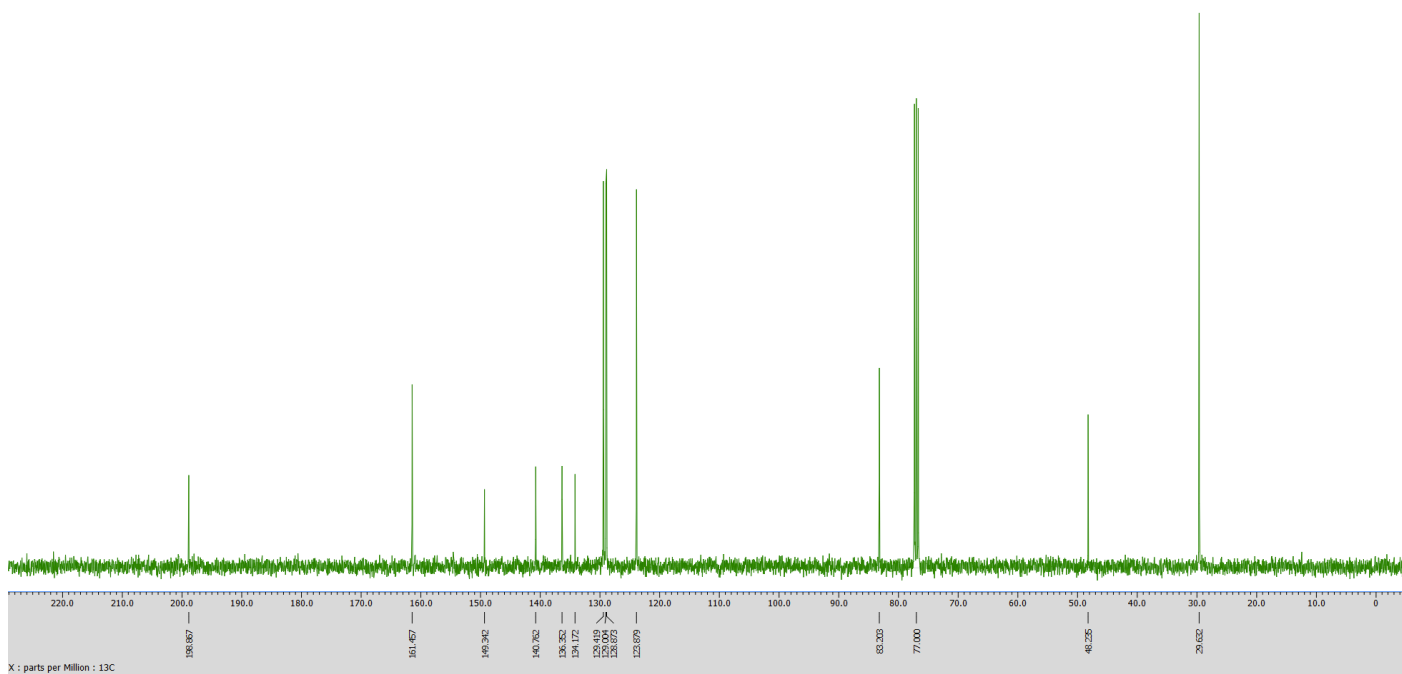

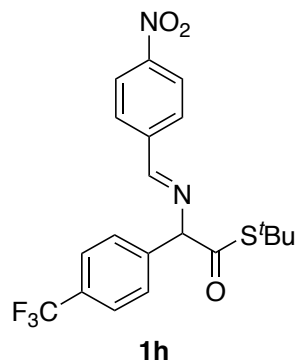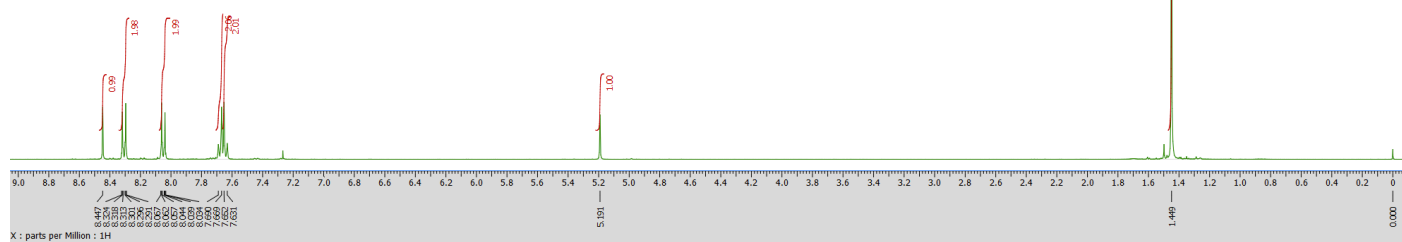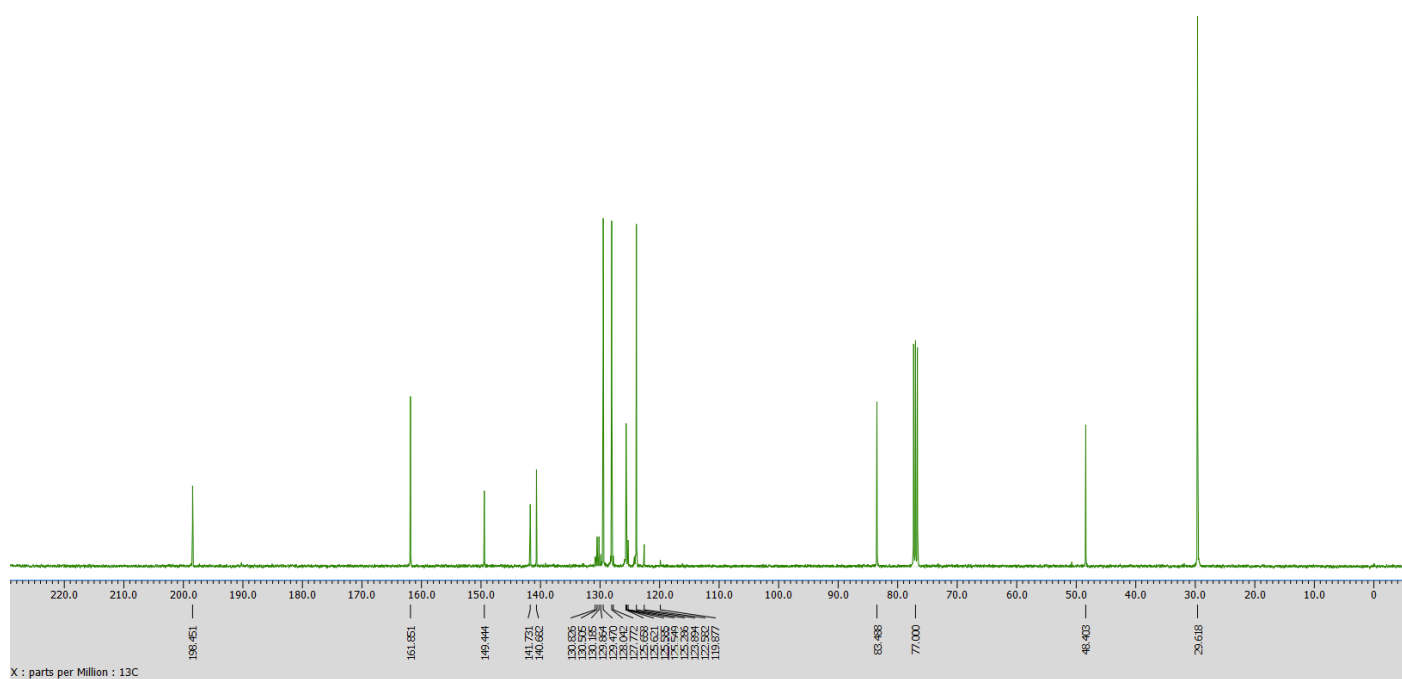

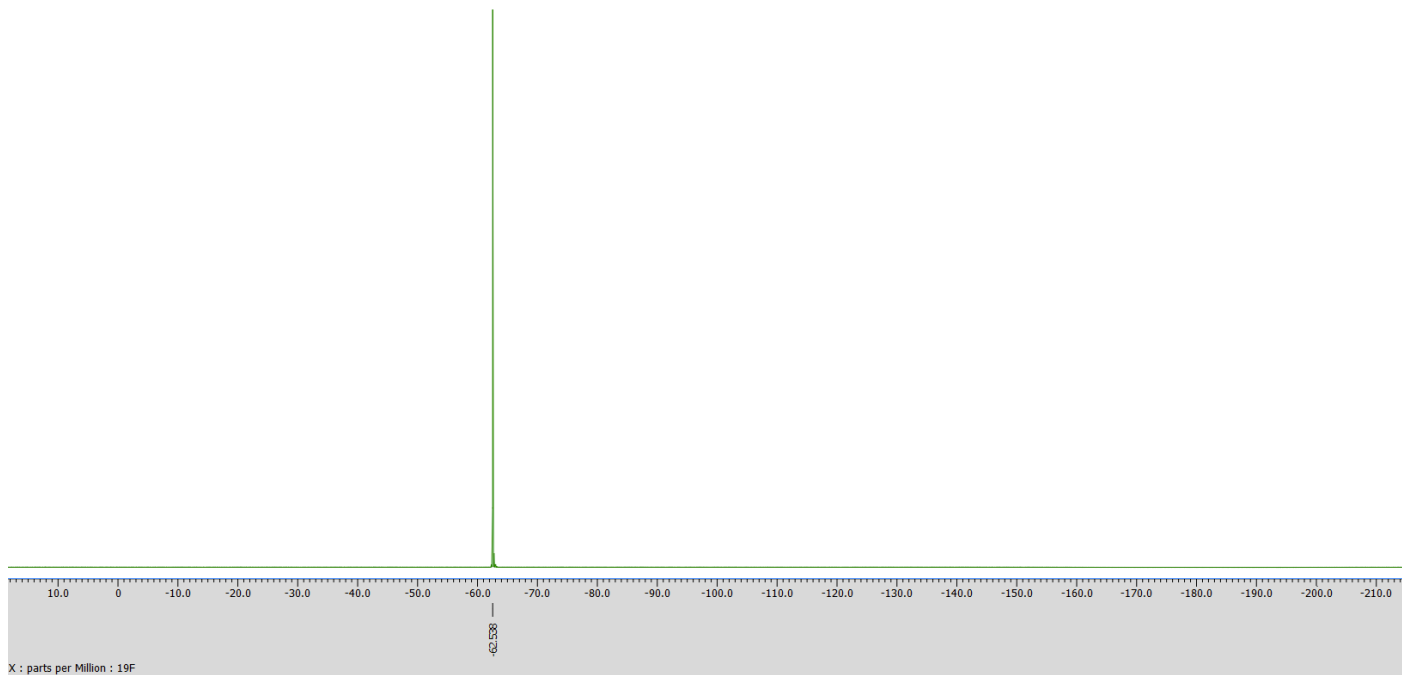

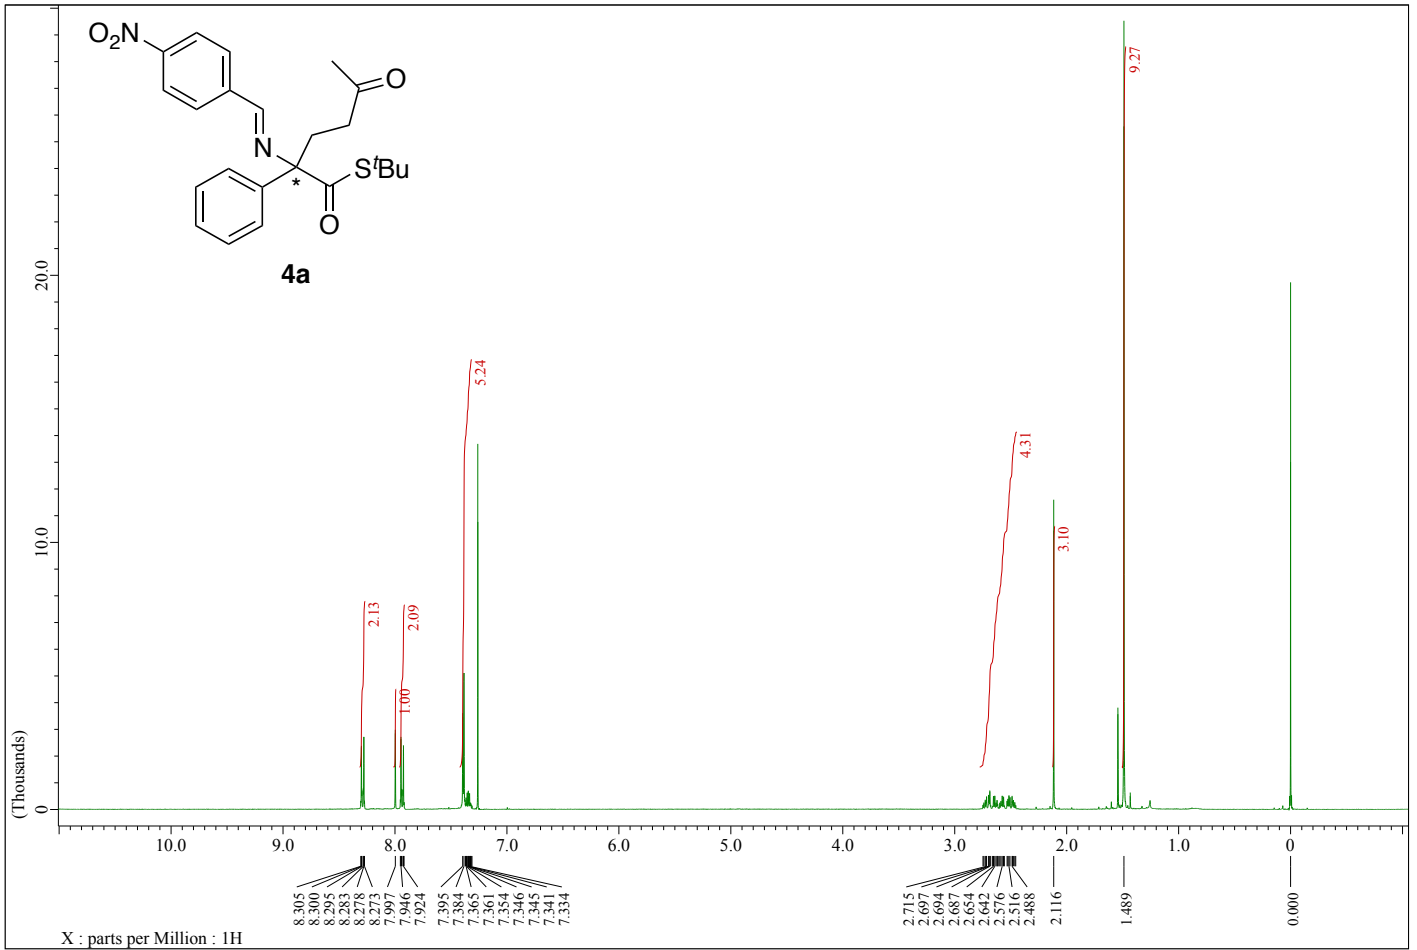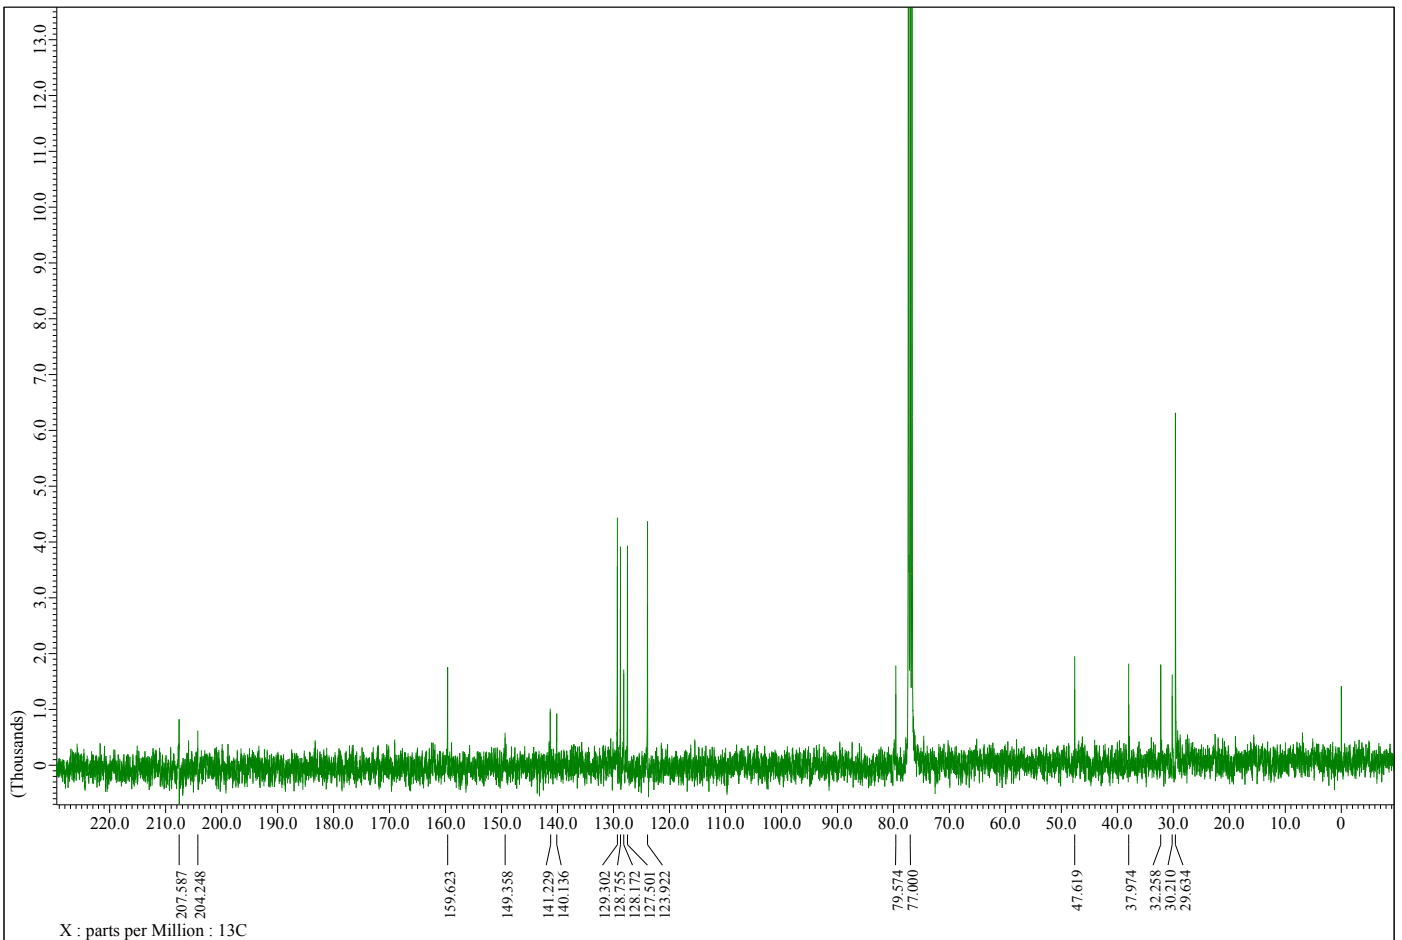

4a (racemate)

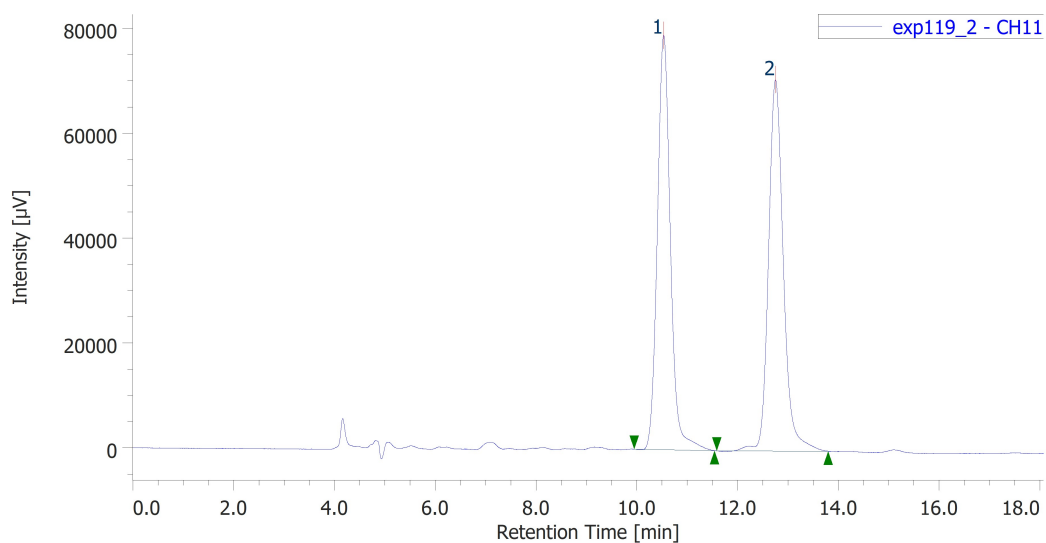

| # | ピーク名    | CH | tR [min] | 面積 [μV·sec] | 高さ [μV] | 面積%    | 高さ%    | 定量値 | NTP  | 分離度   | シンメトリー係数 | 警告 |
|---|---------|----|----------|-------------|---------|--------|--------|-----|------|-------|----------|----|
| 1 | Unknown | 11 | 10.532   | 1419796     | 78988   | 49.458 | 52.739 | N/A | 8642 | 4.609 | 1.104    |    |
| 2 | Unknown | 11 | 12.750   | 1450898     | 70783   | 50.542 | 47.261 | N/A | 9919 | N/A   | 1.182    |    |

4a

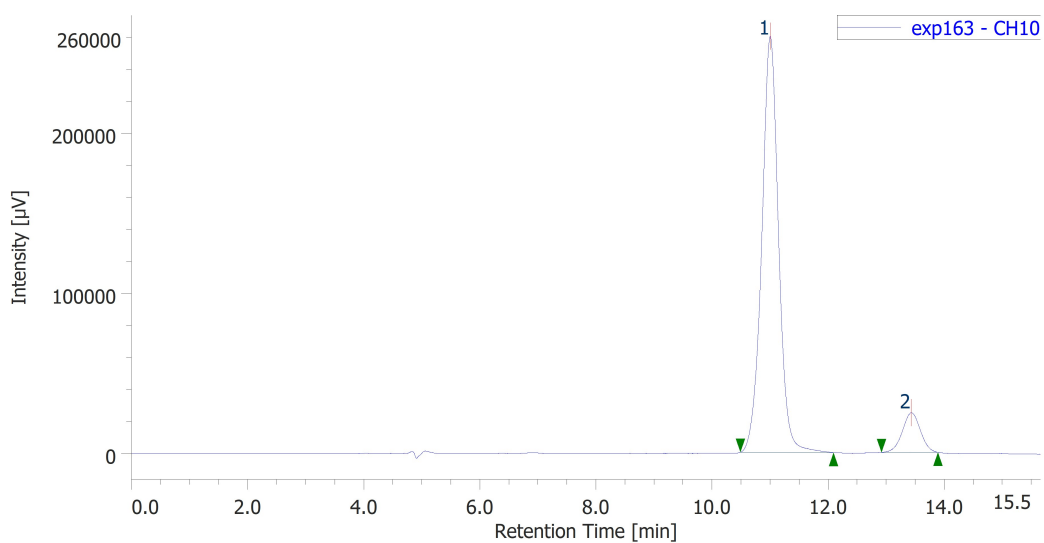

| # | ピーク名    | CH | tR [min] | 面積 [μV·sec] | 高さ [μV] | 面積%    | 高さ%    | 定量値 | NTP  | 分離度   | シンメトリー係数 | 警告 |
|---|---------|----|----------|-------------|---------|--------|--------|-----|------|-------|----------|----|
| 1 | Unknown | 10 | 11.000   | 5220437     | 259826  | 90.716 | 91.296 | N/A | 7604 | 4.552 | 0.999    |    |
| 2 | Unknown | 10 | 13.430   | 534263      | 24772   | 9.284  | 8.704  | N/A | 9009 | N/A   | 1.003    |    |

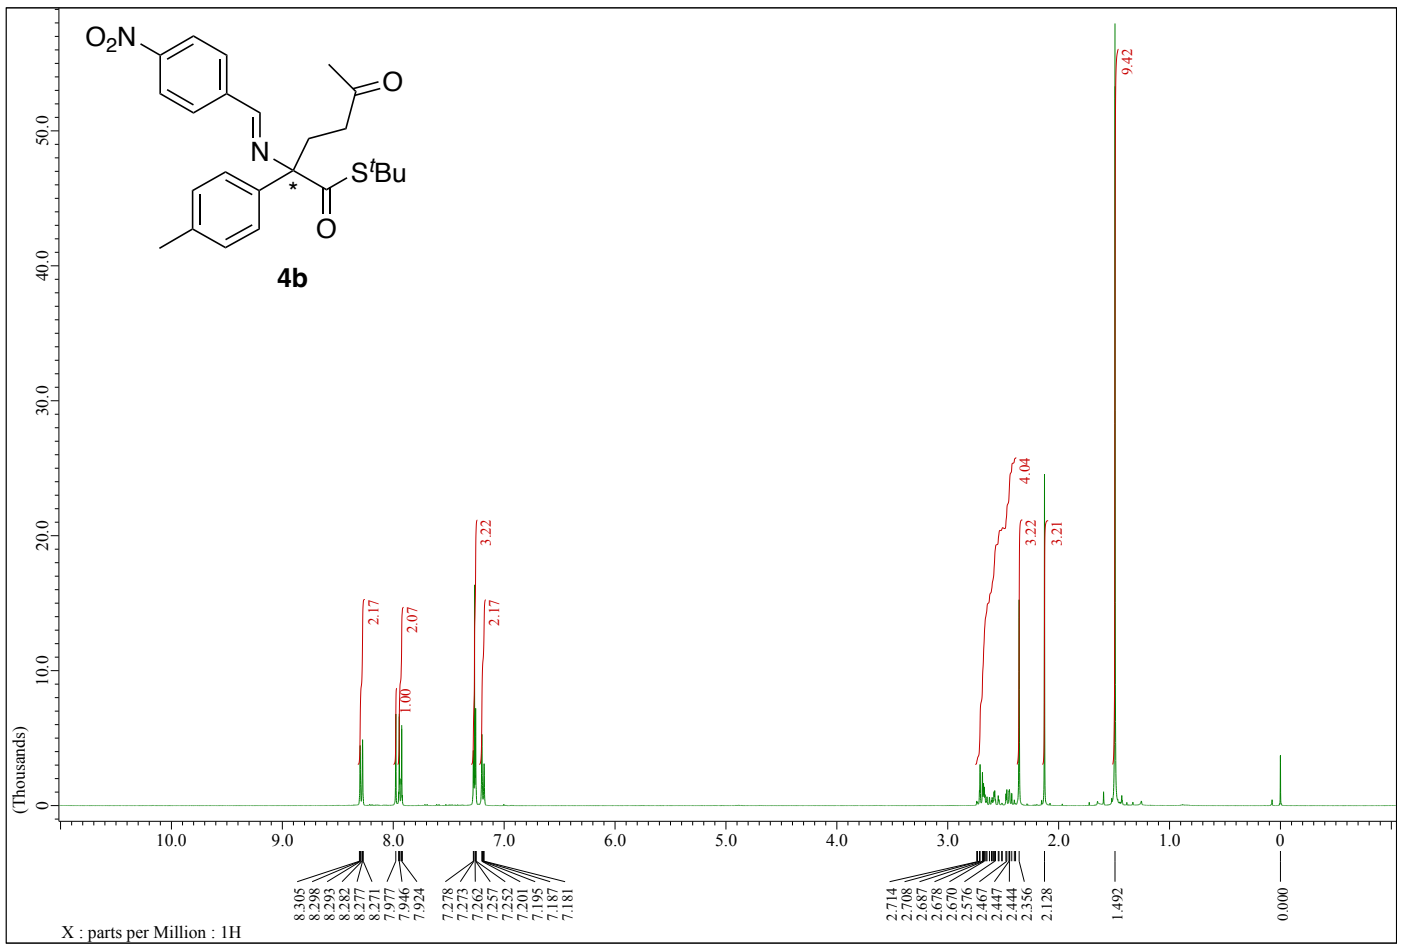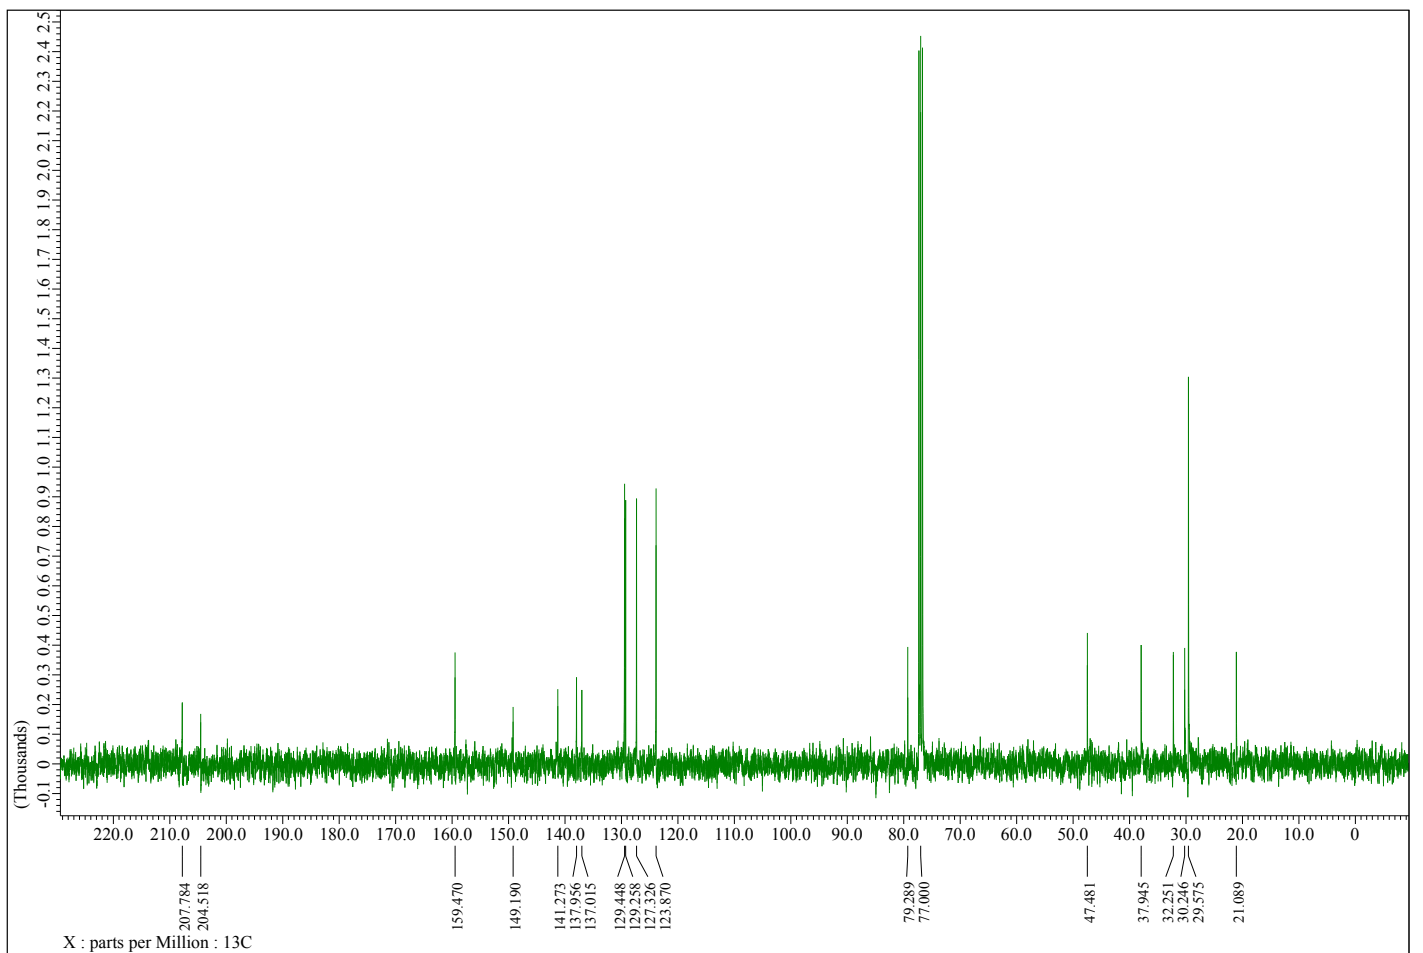

4b (racemate)

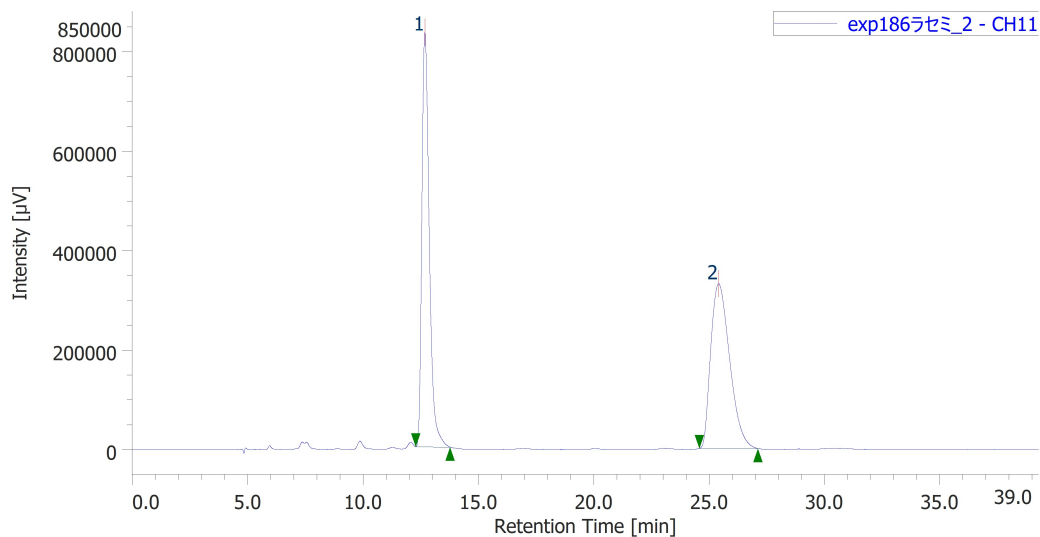

| # | ピーク名    | CH | tR [min] | 面積 [μV·sec] | 高さ [μV] | 面積%    | 高さ%    | 定量値 | NTP  | 分離度    | シンメトリー係数 | 警告 |
|---|---------|----|----------|-------------|---------|--------|--------|-----|------|--------|----------|----|
| 1 | Unknown | 11 | 12.677   | 18596724    | 833561  | 49.614 | 71.565 | N/A | 7905 | 12.120 | 1.450    |    |
| 2 | Unknown | 11 | 25.403   | 18886093    | 331193  | 50.386 | 28.435 | N/A | 4379 | N/A    | 1.423    |    |

4b

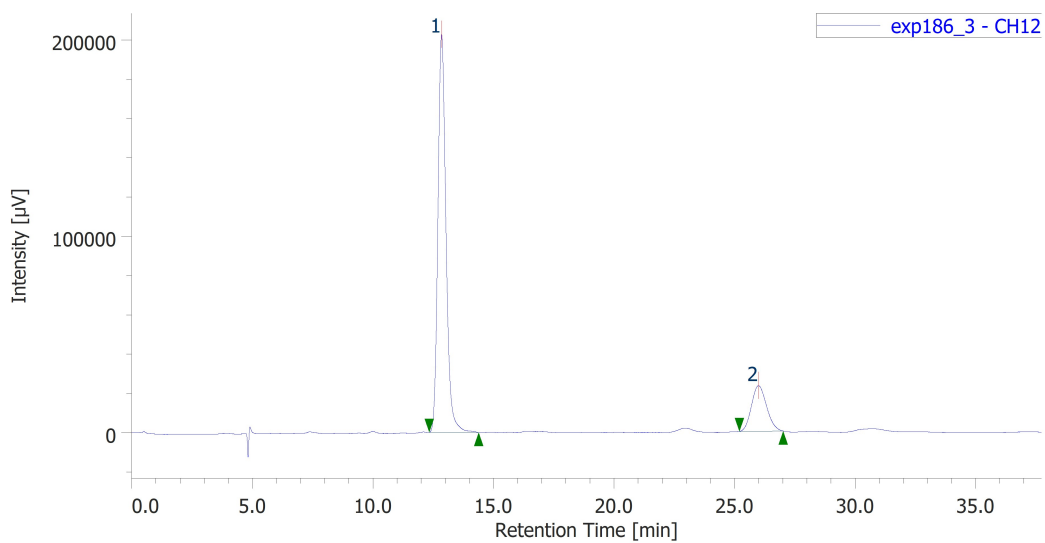

| # | ピーク名    | CH | tR [min] | 面積 [μV·sec] | 高さ [μV] | 面積%    | 高さ%    | 定量値 | NTP  | 分離度    | シンメトリー係数 | 警告 |
|---|---------|----|----------|-------------|---------|--------|--------|-----|------|--------|----------|----|
| 1 | Unknown | 12 | 12.845   | 4707122     | 202633  | 82.334 | 89.706 | N/A | 7597 | 15.119 | 1.202    |    |
| 2 | Unknown | 12 | 25.987   | 1009996     | 23253   | 17.666 | 10.294 | N/A | 8119 | N/A    | 1.144    |    |



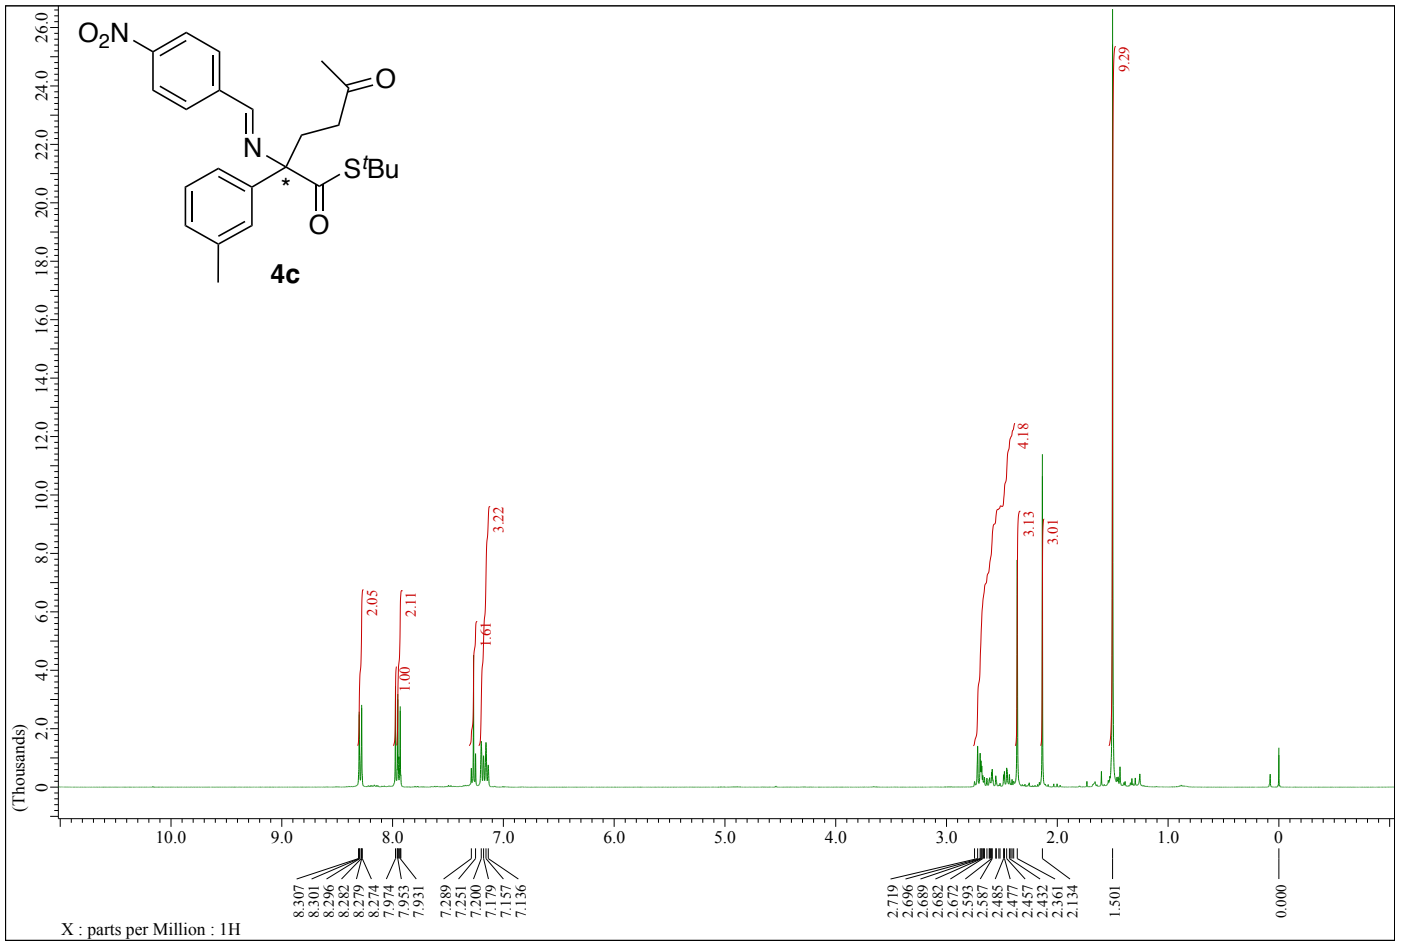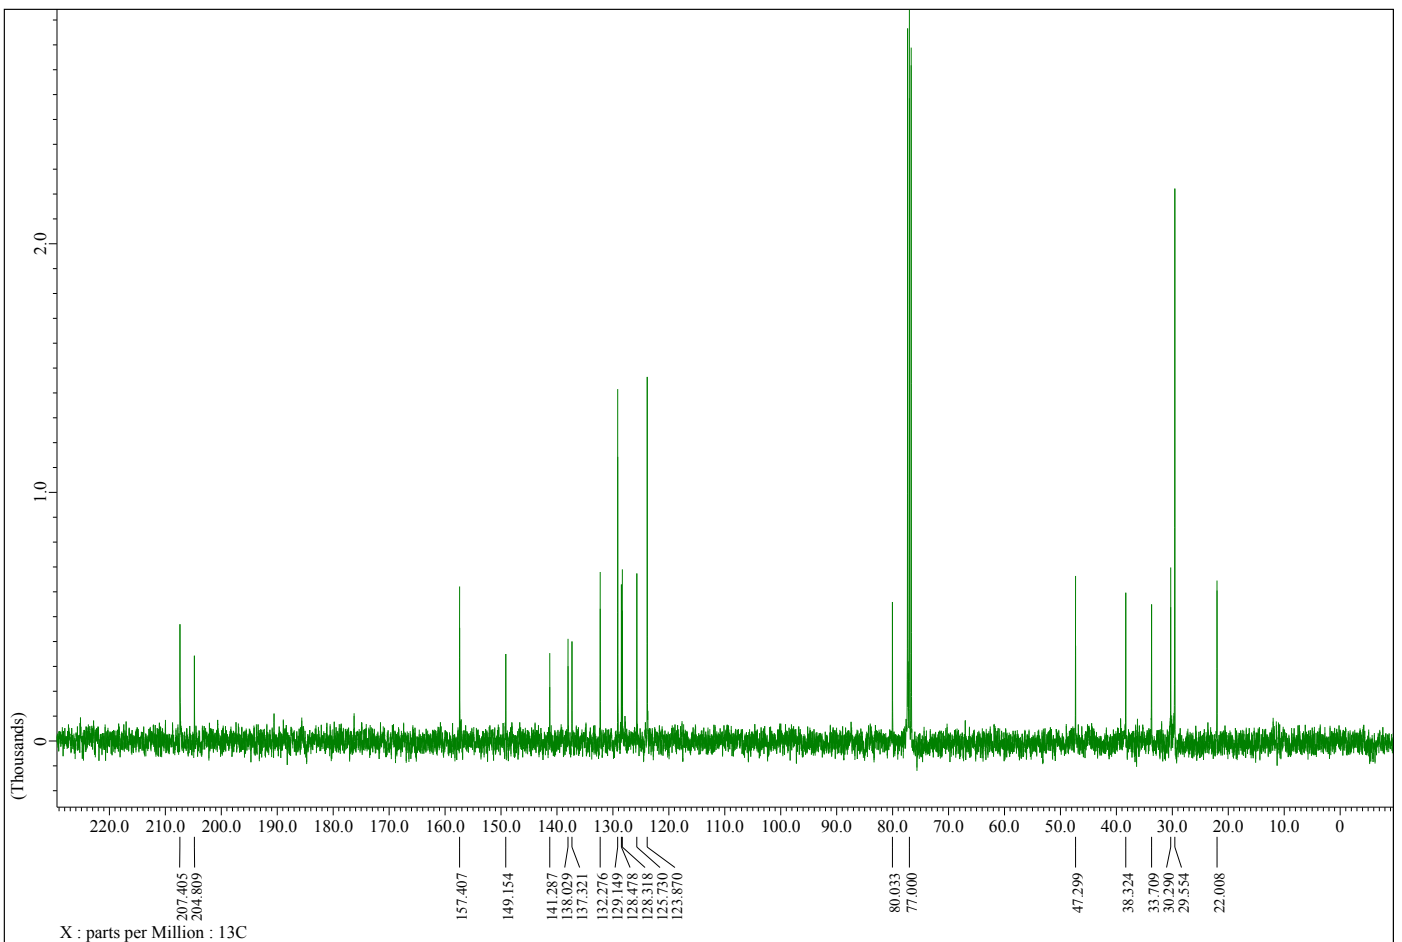

4c (racemate)

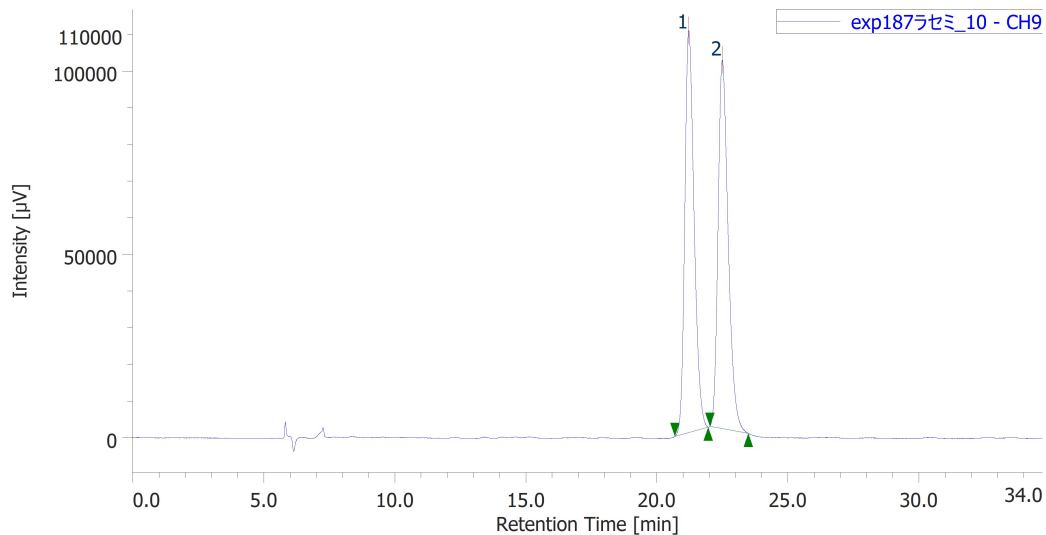

| # | ピーク名    | CH | tR [min] | 面積 [μV·sec] | 高さ [μV] | 面積%    | 高さ%    | 定量値 | NTP   | 分離度   | シンメトリー係数 | 警告 |
|---|---------|----|----------|-------------|---------|--------|--------|-----|-------|-------|----------|----|
| 1 | Unknown | 9  | 21.210   | 2706378     | 109715  | 50.148 | 52.193 | N/A | 17460 | 1.923 | 1.265    |    |
| 2 | Unknown | 9  | 22.488   | 2690428     | 100494  | 49.852 | 47.807 | N/A | 16946 | N/A   | 1.330    |    |

4c

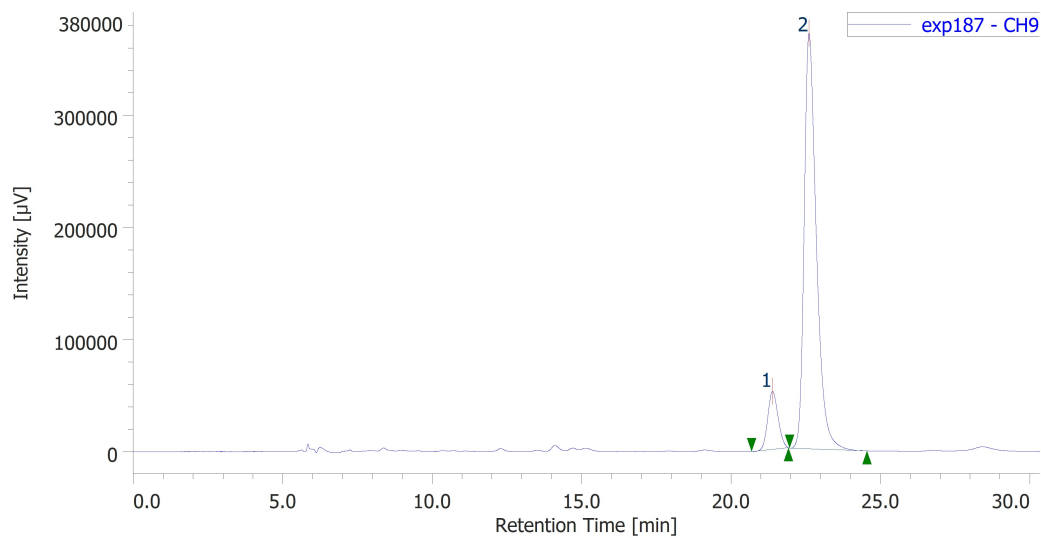

| # | ピーク名    | CH | tR [min] | 面積 [μV·sec] | 高さ [μV] | 面積%    | 高さ%    | 定量値 | NTP   | 分離度   | シンメトリー係数 | 警告 |
|---|---------|----|----------|-------------|---------|--------|--------|-----|-------|-------|----------|----|
| 1 | Unknown | 9  | 21.383   | 1244705     | 51836   | 10.621 | 12.279 | N/A | 18070 | 1.816 | 1.111    |    |
| 2 | Unknown | 9  | 22.605   | 10474096    | 370306  | 89.379 | 87.721 | N/A | 16090 | N/A   | 1.421    |    |

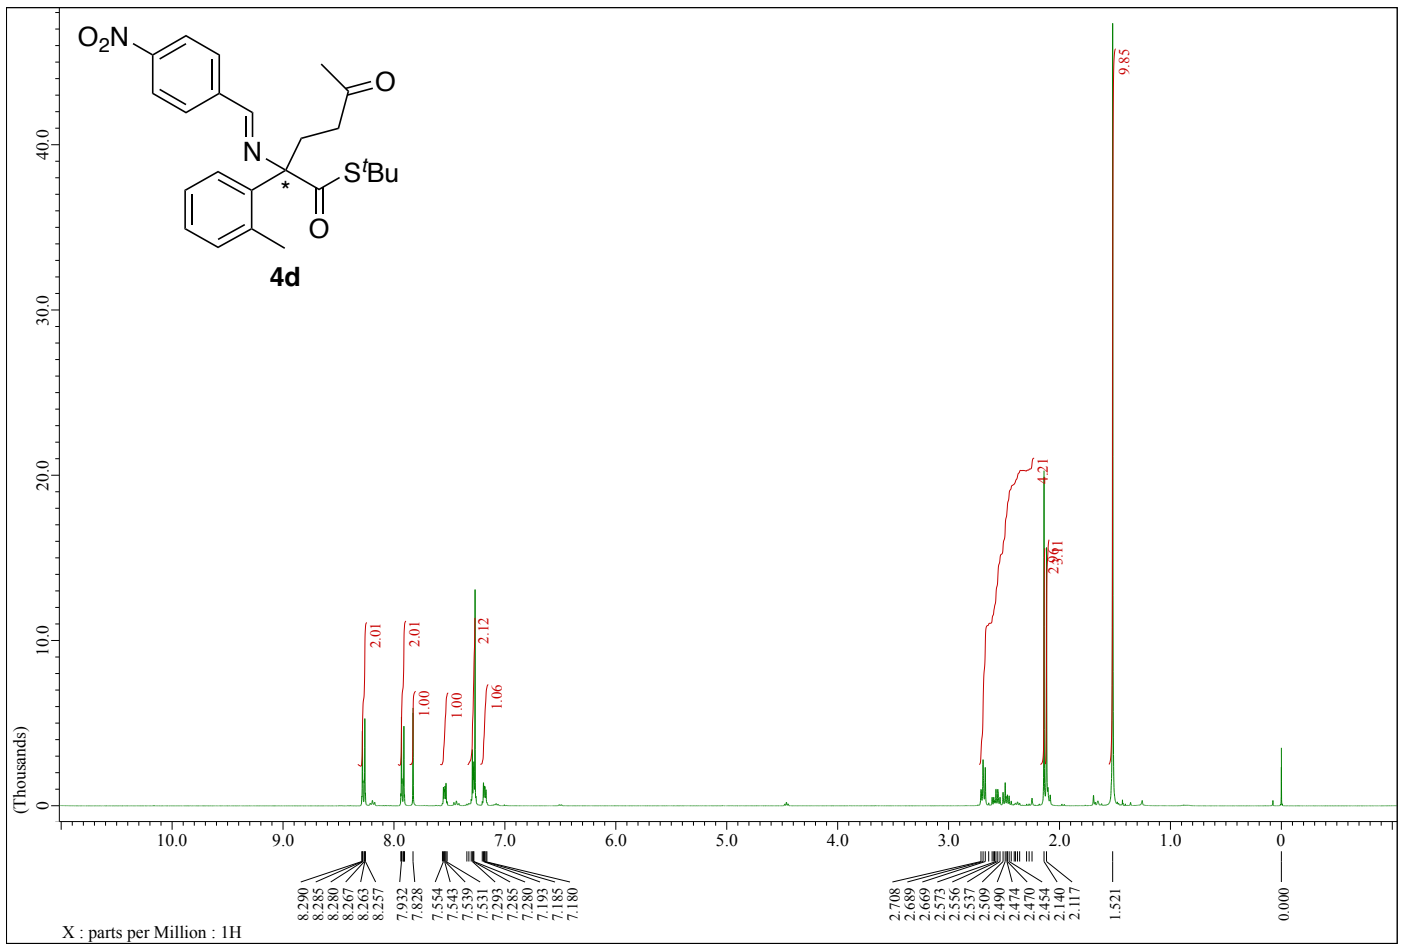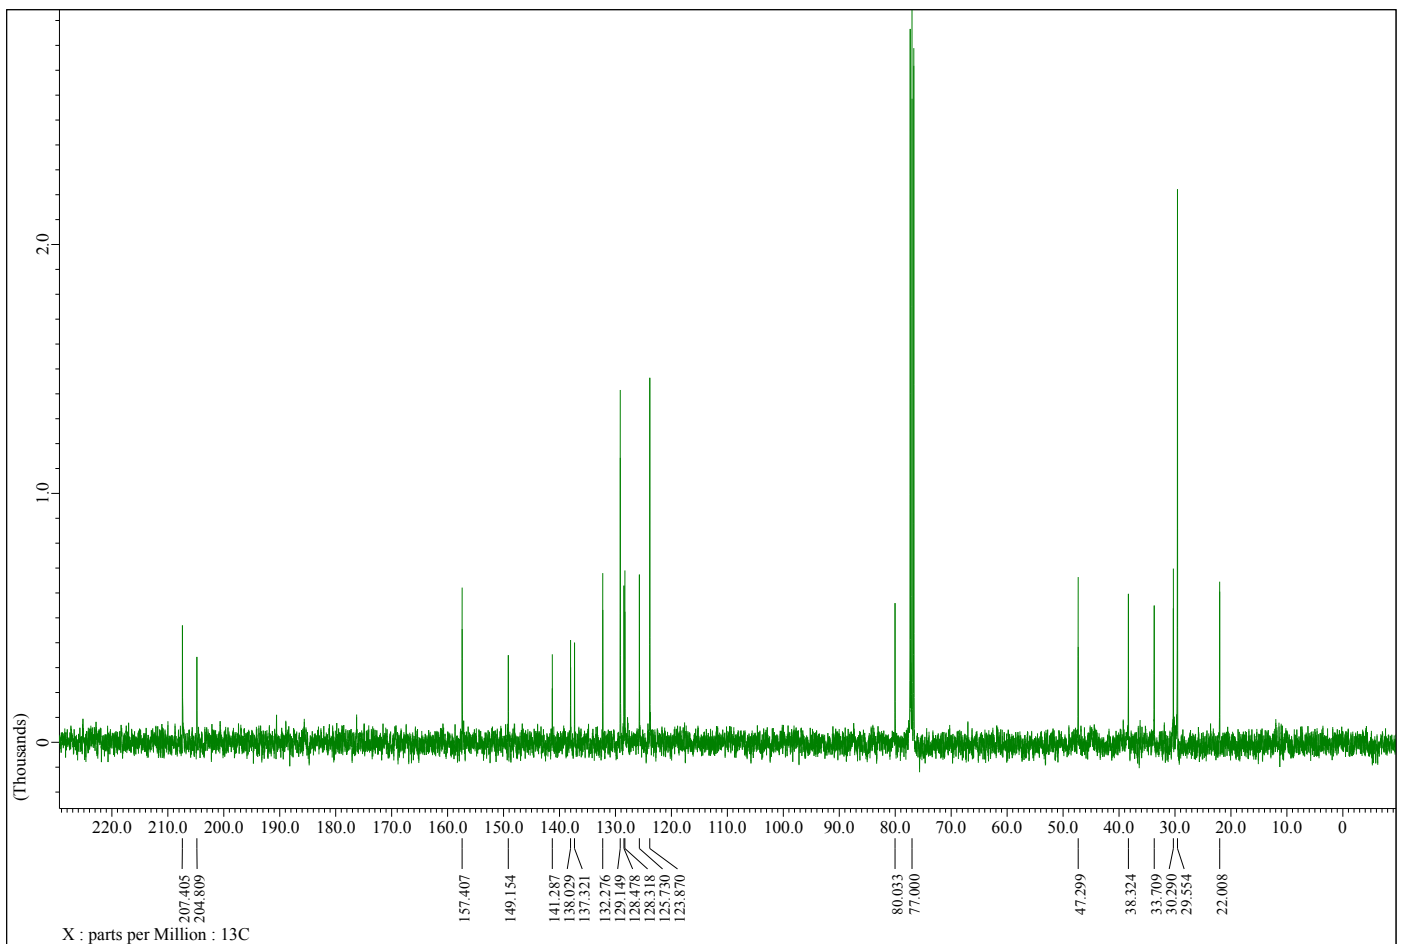

4d (racemate)

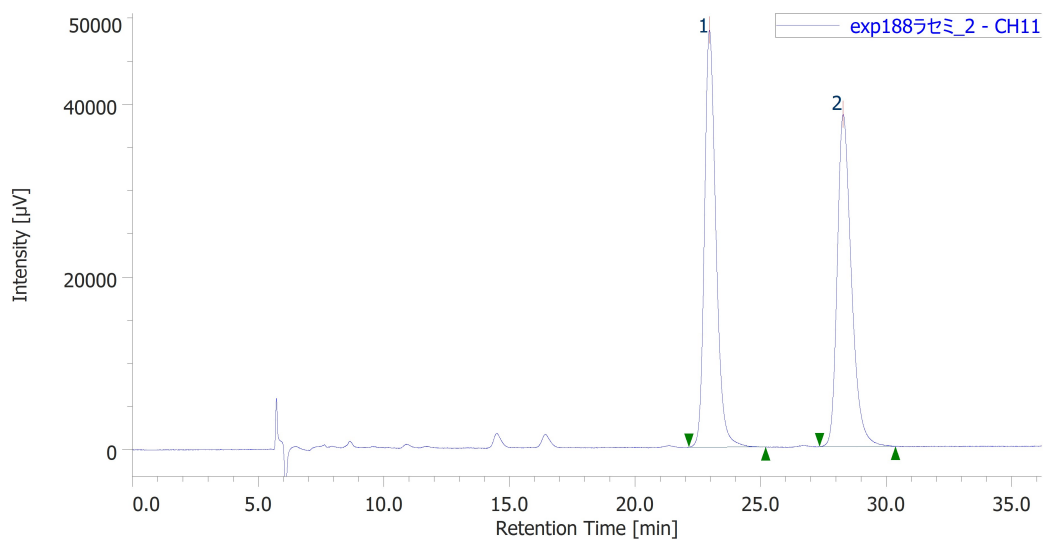

| # | ピーク名    | CH | tR [min] | 面積 [μV·sec] | 高さ [μV] | 面積%    | 高さ%    | 定量値 | NTP   | 分離度   | シンメトリー係数 | 警告 |
|---|---------|----|----------|-------------|---------|--------|--------|-----|-------|-------|----------|----|
| 1 | Unknown | 11 | 22.960   | 1530264     | 48261   | 50.388 | 55.649 | N/A | 12982 | 5.918 | 1.251    |    |
| 2 | Unknown | 11 | 28.277   | 1506680     | 38462   | 49.612 | 44.351 | N/A | 12912 | N/A   | 1.350    |    |

4d

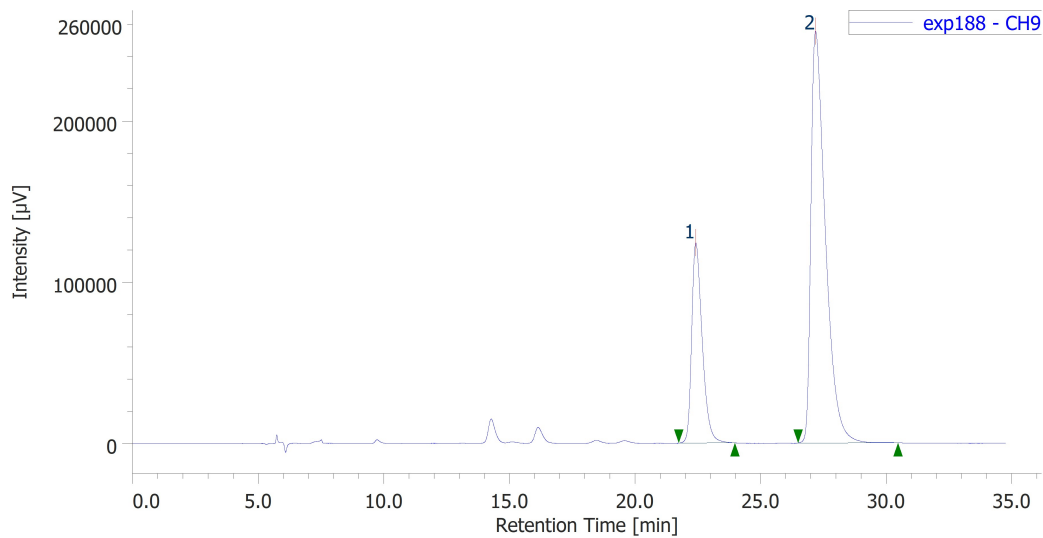

| # | ピーク名    | CH | tR [min] | 面積 [μV·sec] | 高さ [μV] | 面積%    | 高さ%    | 定量値 | NTP   | 分離度   | シンメトリー係数 | 警告 |
|---|---------|----|----------|-------------|---------|--------|--------|-----|-------|-------|----------|----|
| 1 | Unknown | 9  | 22.413   | 3617428     | 124229  | 26.122 | 32.740 | N/A | 14619 | 5.434 | 1.431    |    |
| 2 | Unknown | 9  | 27.180   | 10230625    | 255211  | 73.878 | 67.260 | N/A | 11415 | N/A   | 1.906    |    |

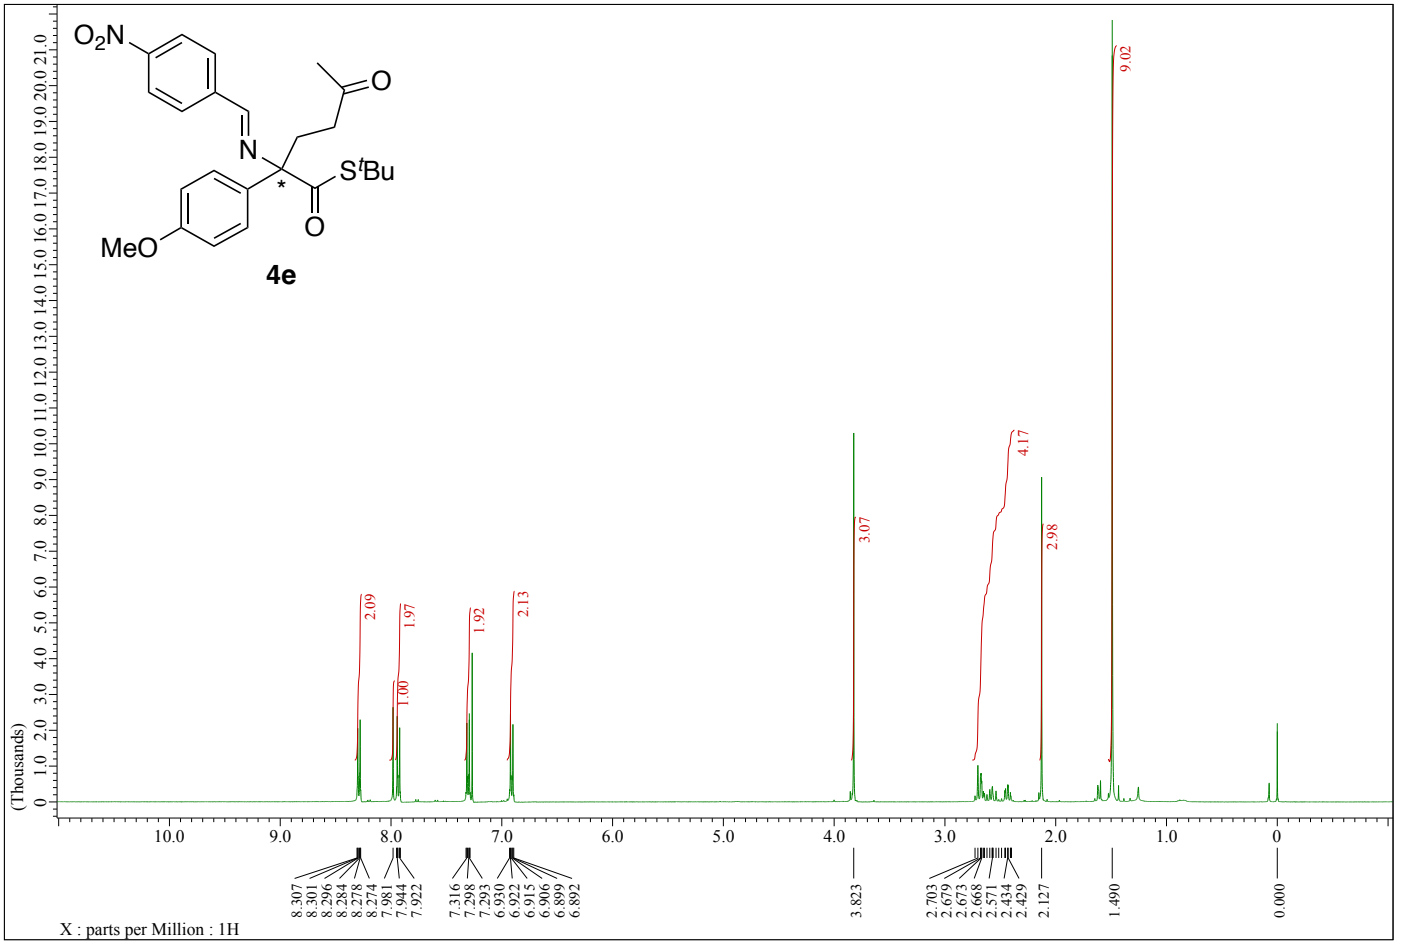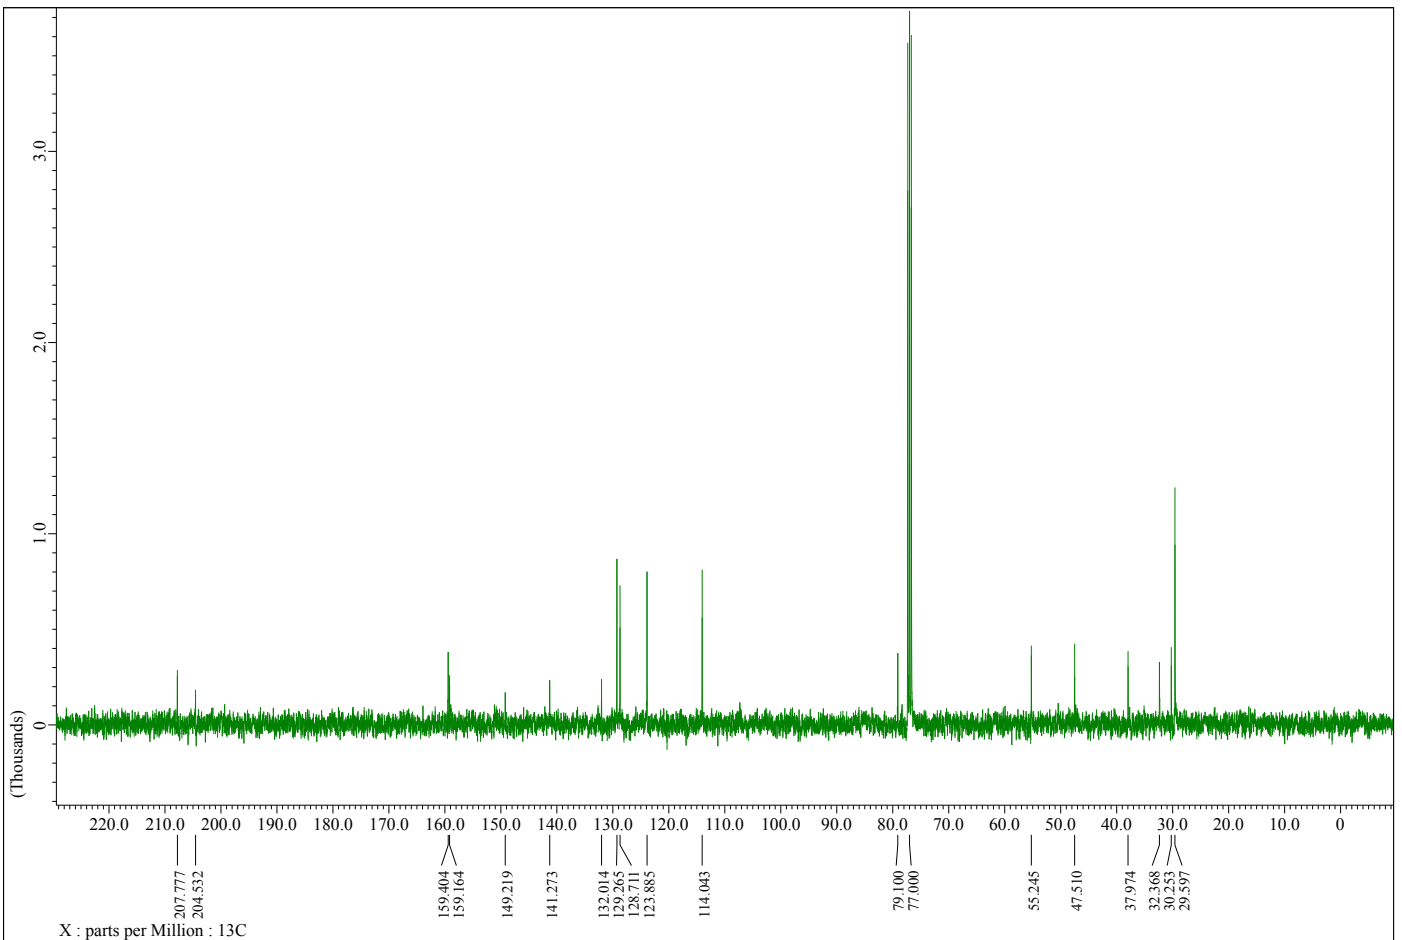

4e (racemate)

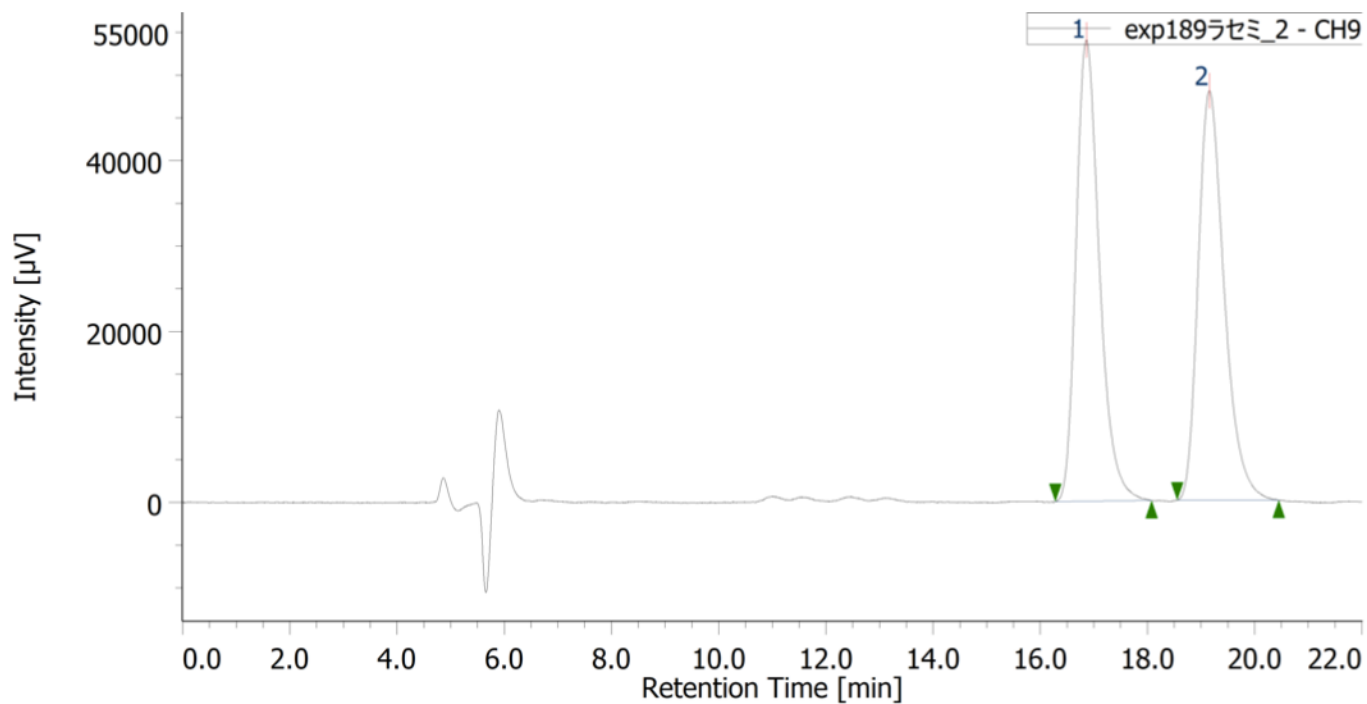

| # | ピーク名    | CH | tR [min] | 面積 [μV·sec] | 高さ [μV] | 面積%    | 高さ%    | 定量値 | NTP  | 分離度   | シンメトリー係数 | 警告 |
|---|---------|----|----------|-------------|---------|--------|--------|-----|------|-------|----------|----|
| 1 | Unknown | 9  | 16.857   | 1633459     | 53932   | 50.253 | 52.971 | N/A | 7503 | 2.792 | 1.299    |    |
| 2 | Unknown | 9  | 19.150   | 1617042     | 47882   | 49.747 | 47.029 | N/A | 7770 | N/A   | 1.349    |    |

4e

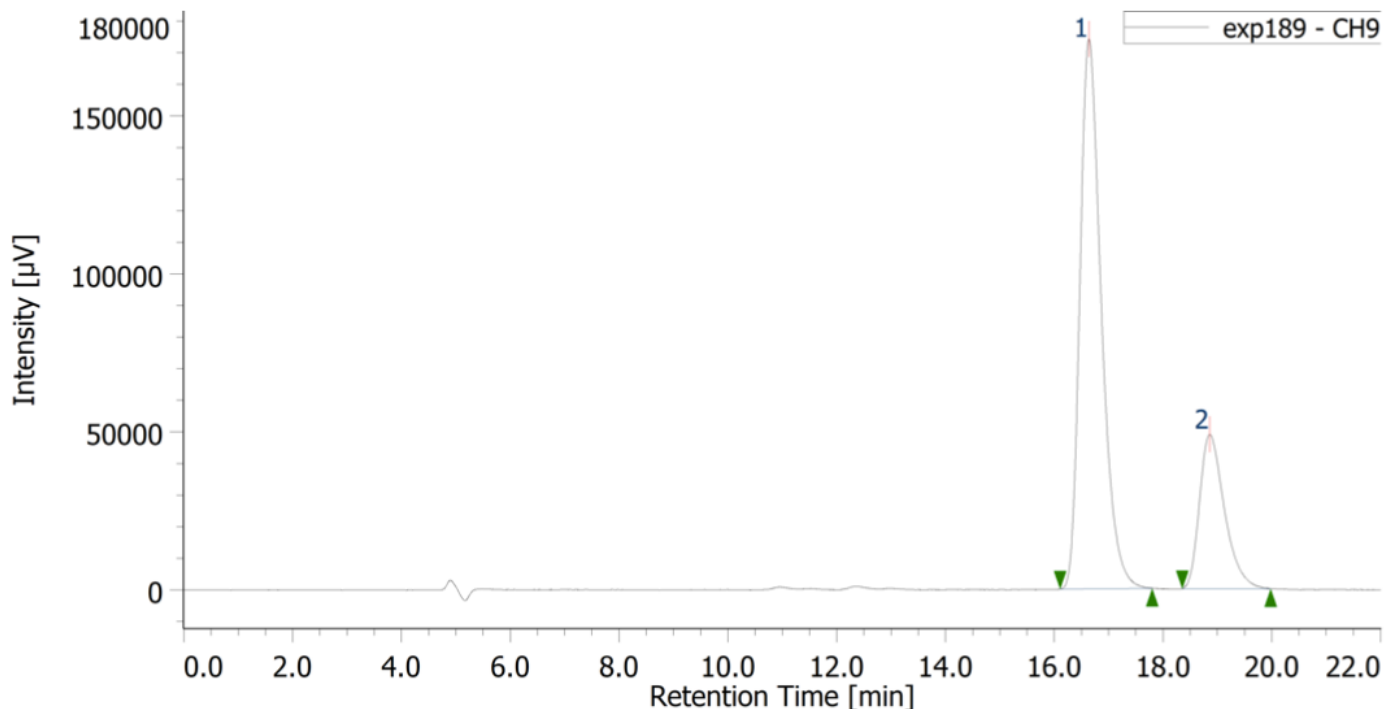

| # | ピーク名    | CH | tR [min] | 面積 [μV·sec] | 高さ [μV] | 面積%    | 高さ%    | 定量値 | NTP  | 分離度   | シンメトリー係数 | 警告 |
|---|---------|----|----------|-------------|---------|--------|--------|-----|------|-------|----------|----|
| 1 | Unknown | 9  | 16.633   | 4754024     | 173903  | 75.364 | 78.087 | N/A | 8972 | 2.924 | 1.362    |    |
| 2 | Unknown | 9  | 18.853   | 1554084     | 48800   | 24.636 | 21.913 | N/A | 8454 | N/A   | 1.417    |    |

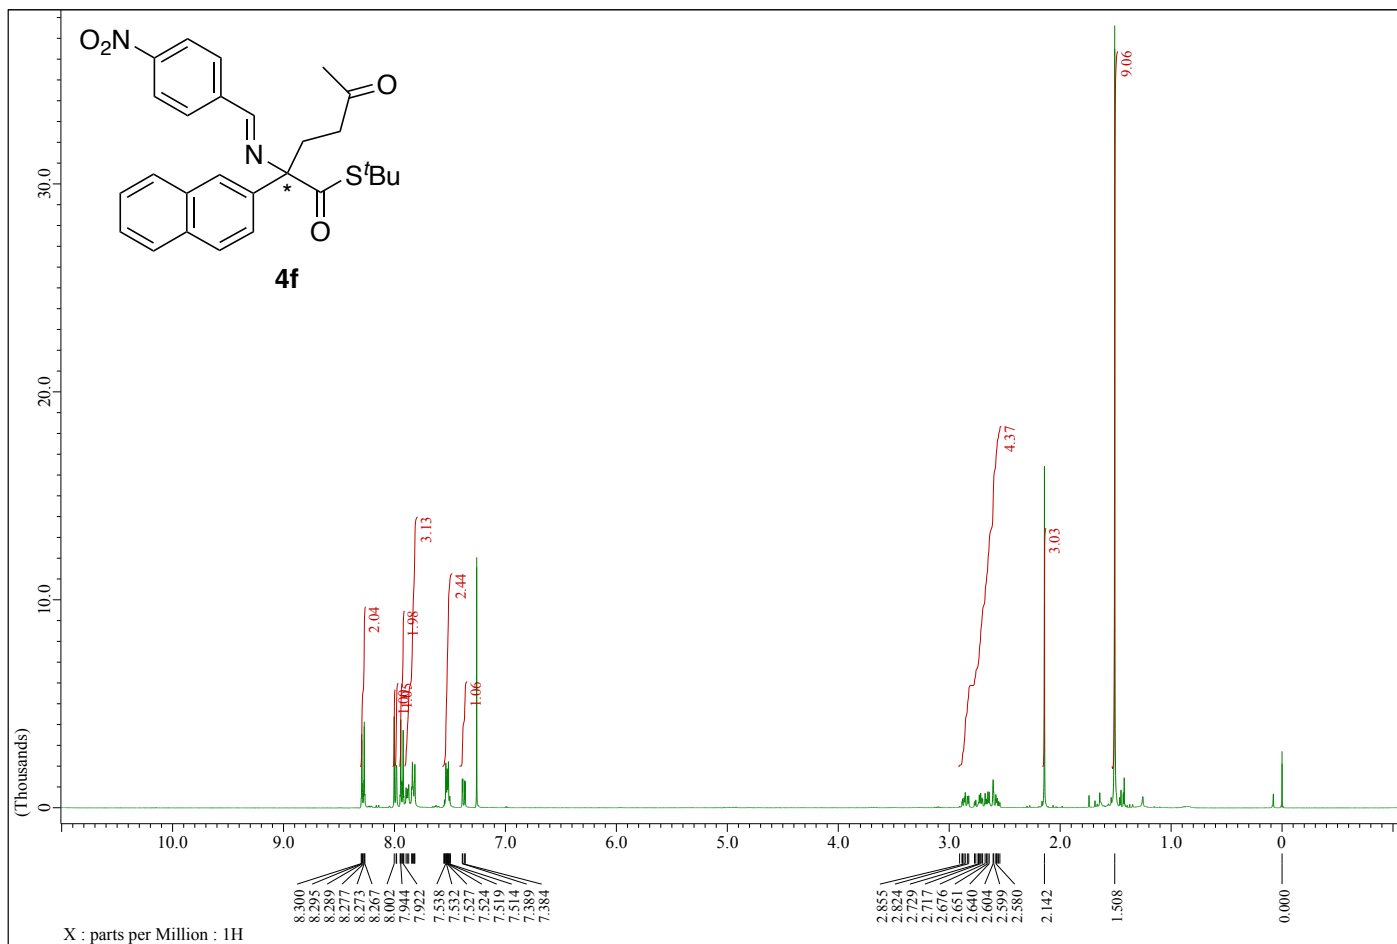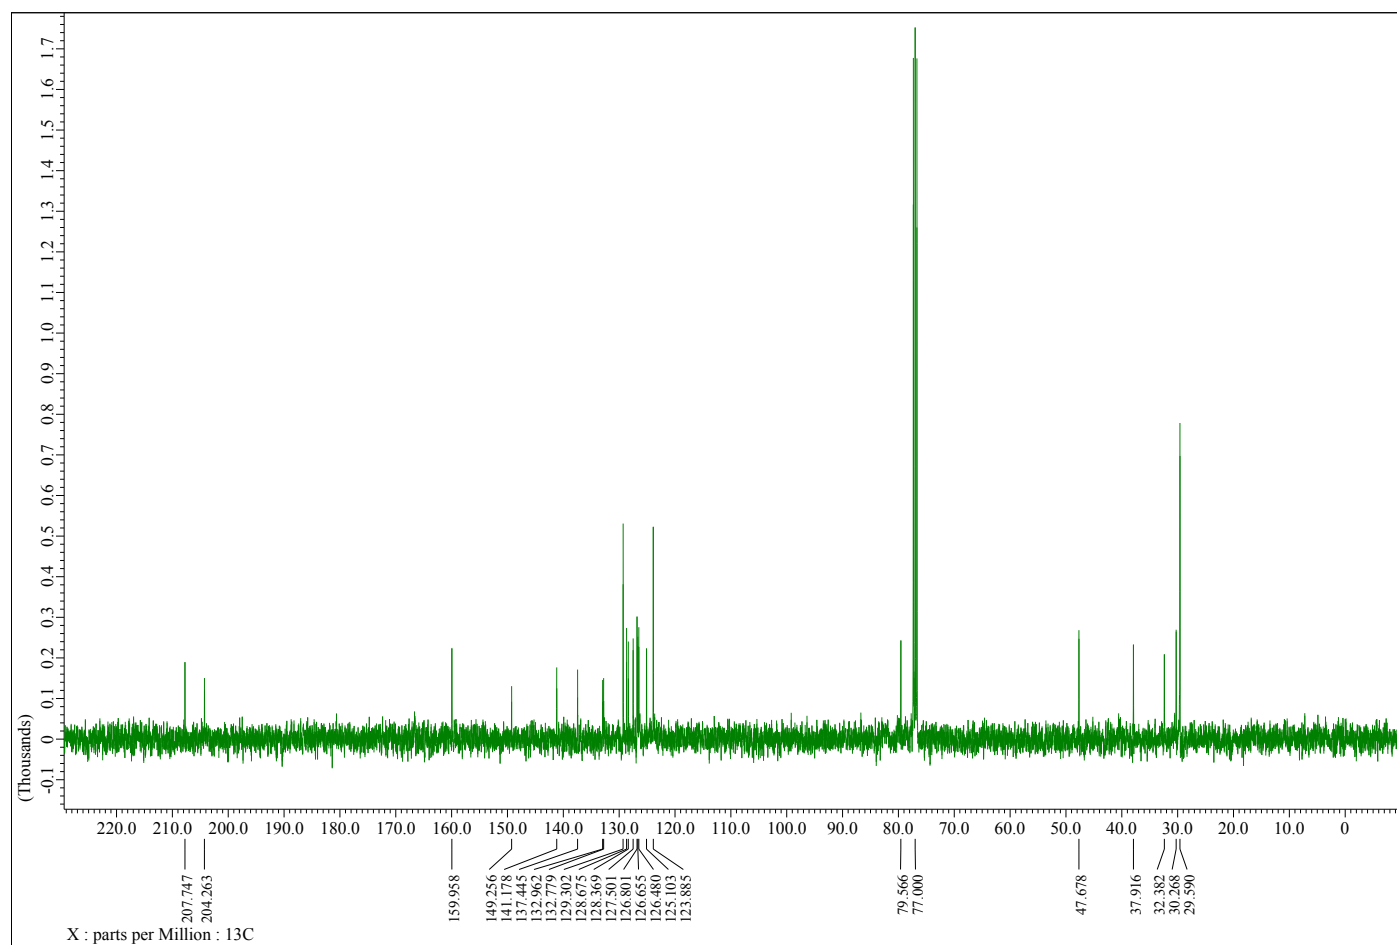

4f (racemate)

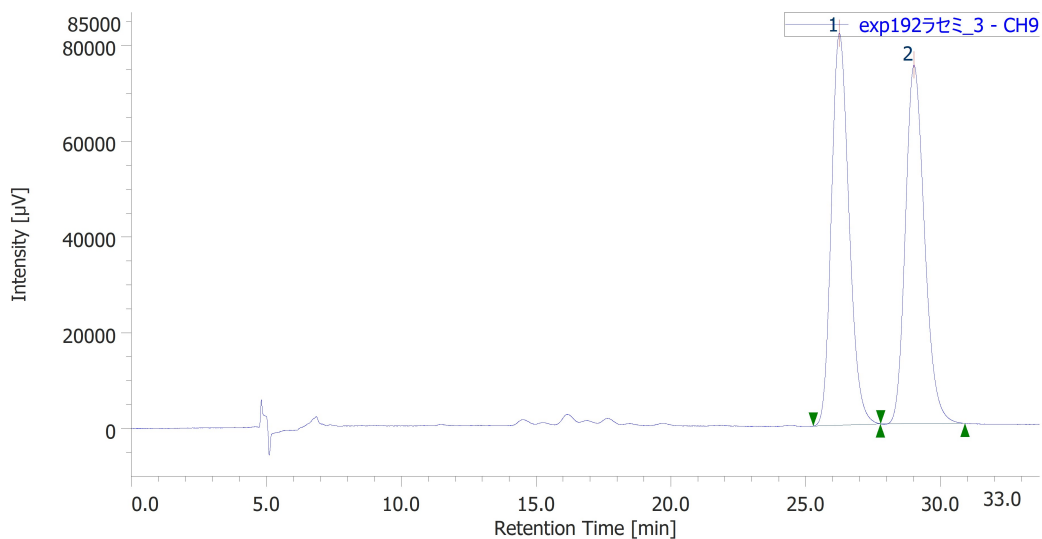

| # | ピーク名    | CH | tR [min] | 面積 [μV·sec] | 高さ [μV] | 面積%    | 高さ%    | 定量値 | NTP   | 分離度   | シンメトリー係数 | 警告 |
|---|---------|----|----------|-------------|---------|--------|--------|-----|-------|-------|----------|----|
| 1 | Unknown | 10 | 28.675   | 3227290     | 76040   | 17.497 | 19.178 | N/A | 11330 | 2.463 | 1.453    |    |
| 2 | Unknown | 10 | 31.477   | 15217899    | 320453  | 82.503 | 80.822 | N/A | 10939 | N/A   | 1.579    |    |

4f

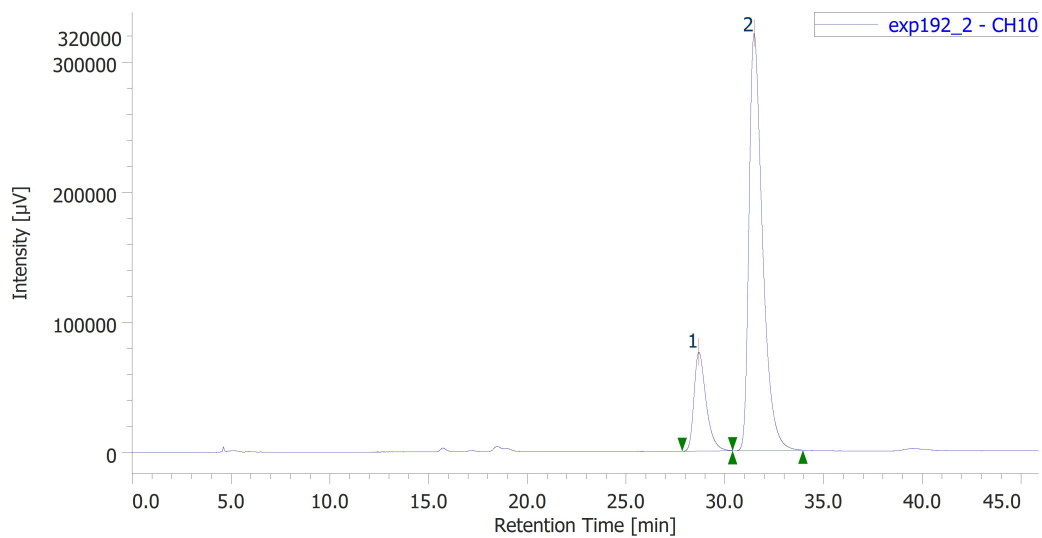

| # | ピーク名    | CH | tR [min] | 面積 [μV·sec] | 高さ [μV] | 面積%    | 高さ%    | 定量値 | NTP  | 分離度   | シンメトリー係数 | 警告 |
|---|---------|----|----------|-------------|---------|--------|--------|-----|------|-------|----------|----|
| 1 | Unknown | 9  | 26.238   | 3709244     | 81822   | 50.129 | 52.201 | N/A | 7804 | 2.247 | 1.208    |    |
| 2 | Unknown | 9  | 29.007   | 3690185     | 74920   | 49.871 | 47.799 | N/A | 8182 | N/A   | 1.214    |    |



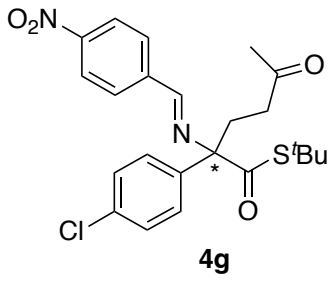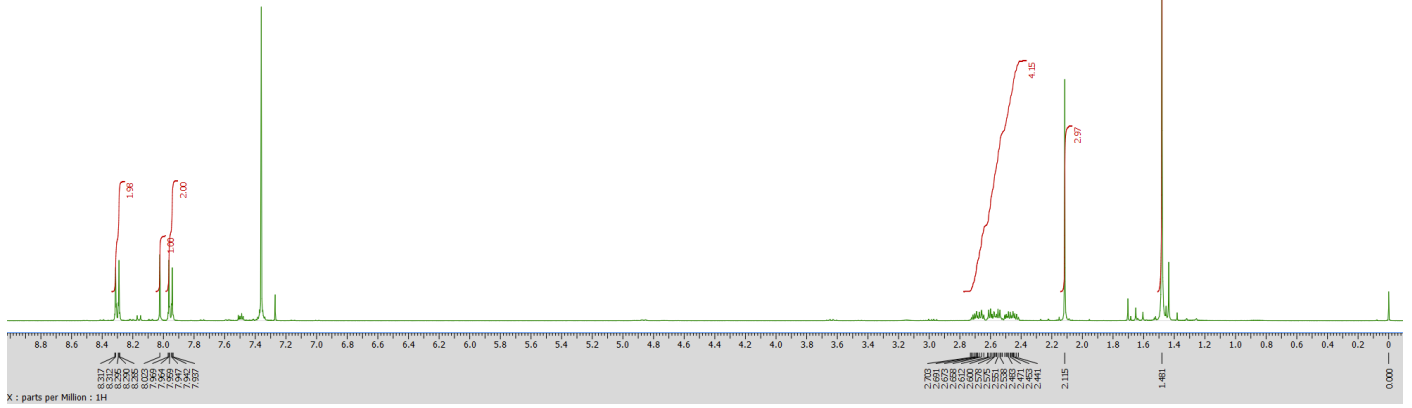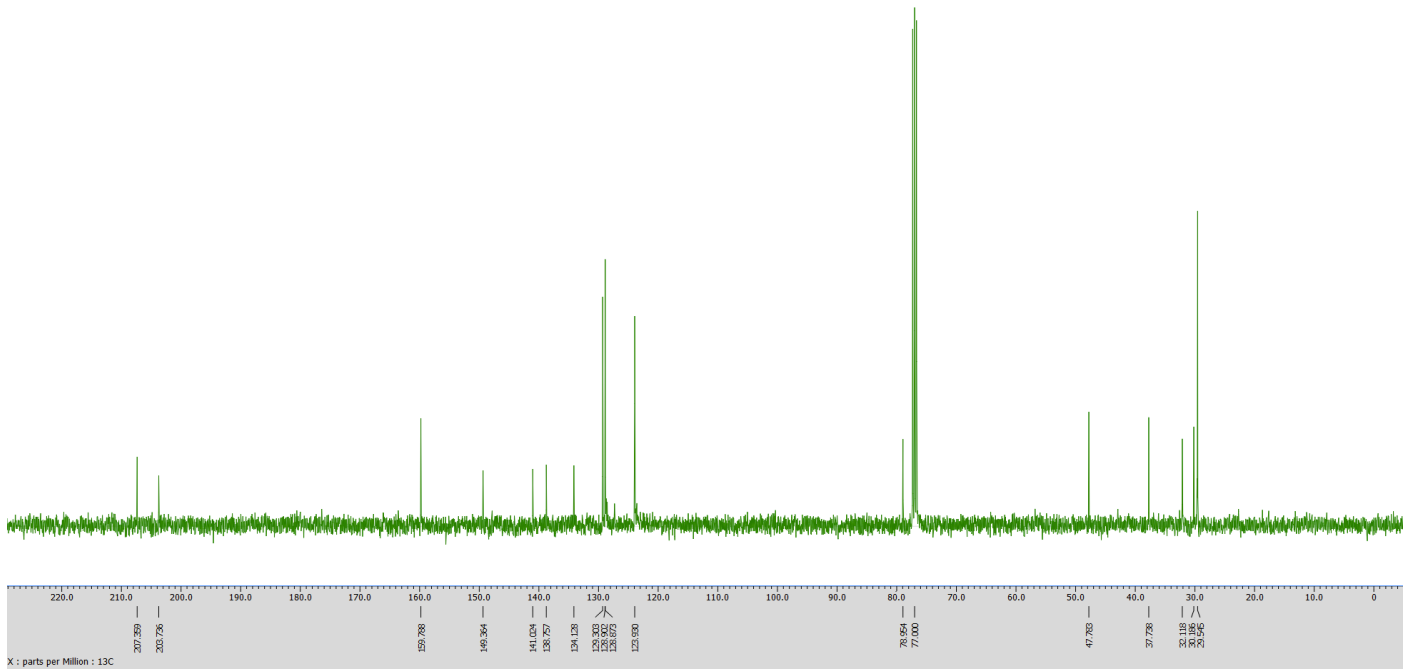

4g (racemate)

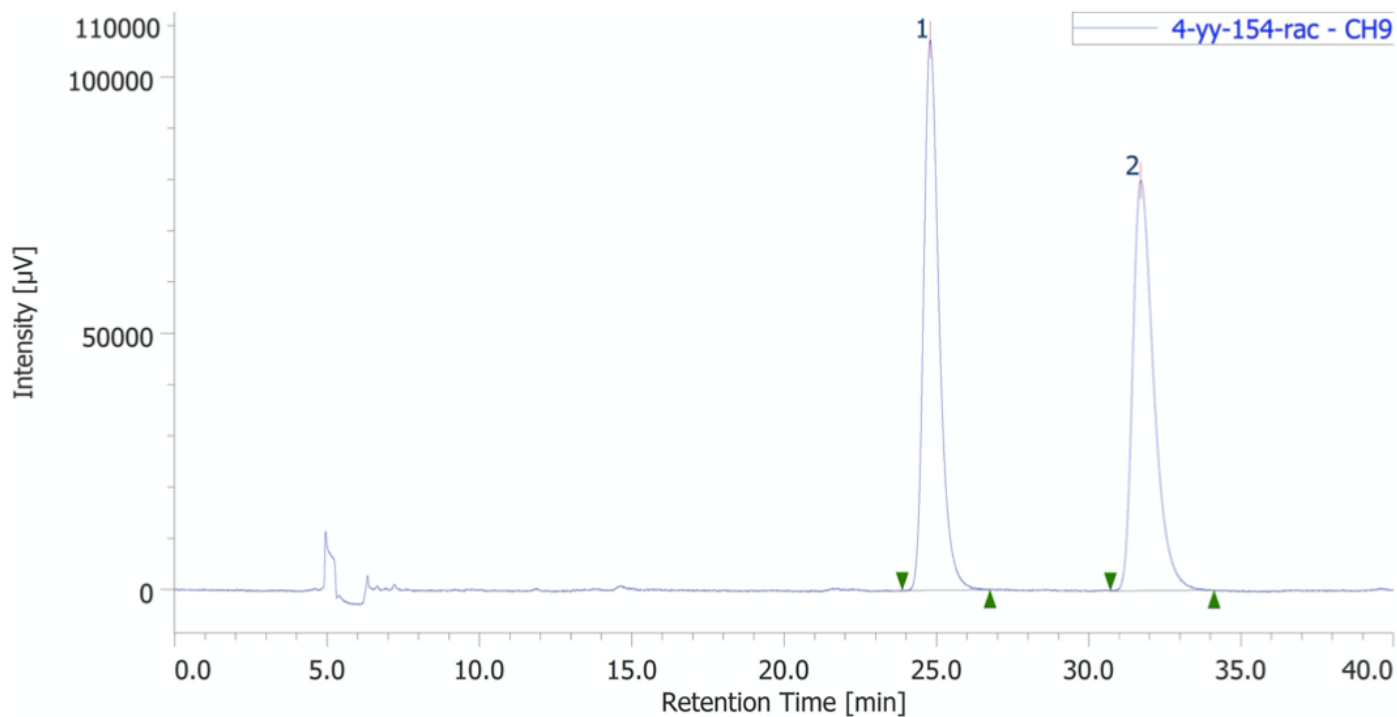

| # | ピーク名    | CH | tR [min] | 面積 [μV·sec] | 高さ [μV] | 面積%    | 高さ%    | 定量値 | NTP   | 分離度   | シンメトリー係数 | 警告 |
|---|---------|----|----------|-------------|---------|--------|--------|-----|-------|-------|----------|----|
| 1 | Unknown | 9  | 24.788   | 3798049     | 107318  | 49.830 | 57.295 | N/A | 12246 | 6.559 | 1.356    |    |
| 2 | Unknown | 9  | 31.708   | 3823895     | 79988   | 50.170 | 42.705 | N/A | 10813 | N/A   | 1.523    |    |

4g

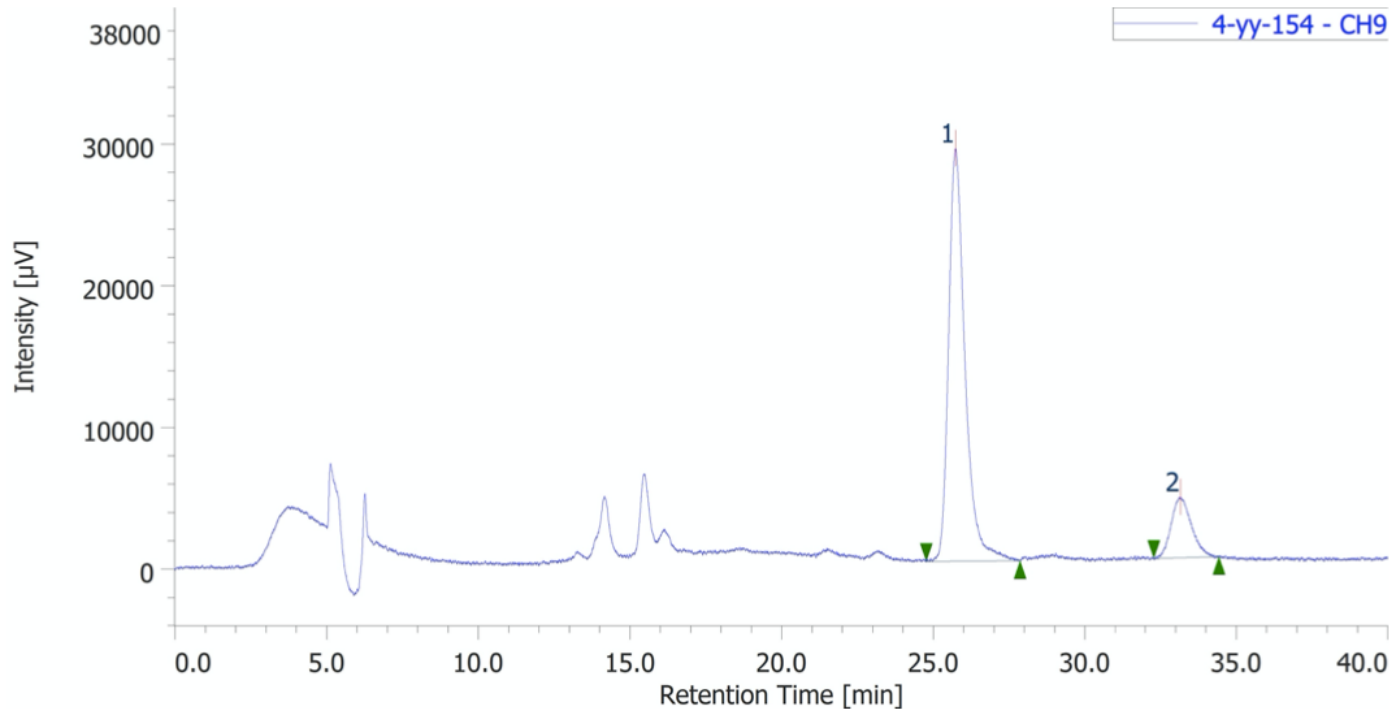

| # | ピーク名    | CH | tR [min] | 面積 [μV·sec] | 高さ [μV] | 面積%    | 高さ%    | 定量値 | NTP   | 分離度   | シンメトリー係数 | 警告 |
|---|---------|----|----------|-------------|---------|--------|--------|-----|-------|-------|----------|----|
| 1 | Unknown | 9  | 25.727   | 1092801     | 29134   | 84.680 | 87.194 | N/A | 12422 | 7.028 | 1.390    |    |
| 2 | Unknown | 9  | 33.153   | 197706      | 4279    | 15.320 | 12.806 | N/A | 12297 | N/A   | 1.179    |    |

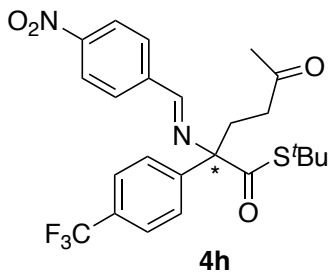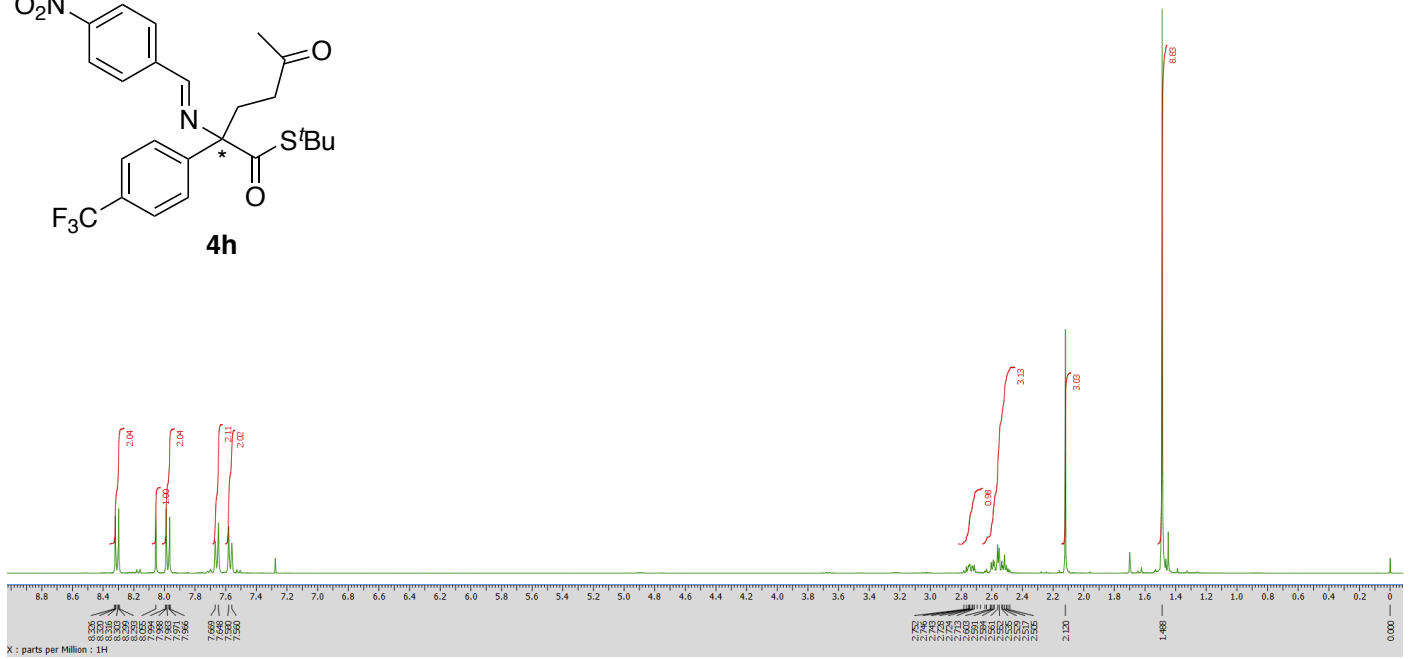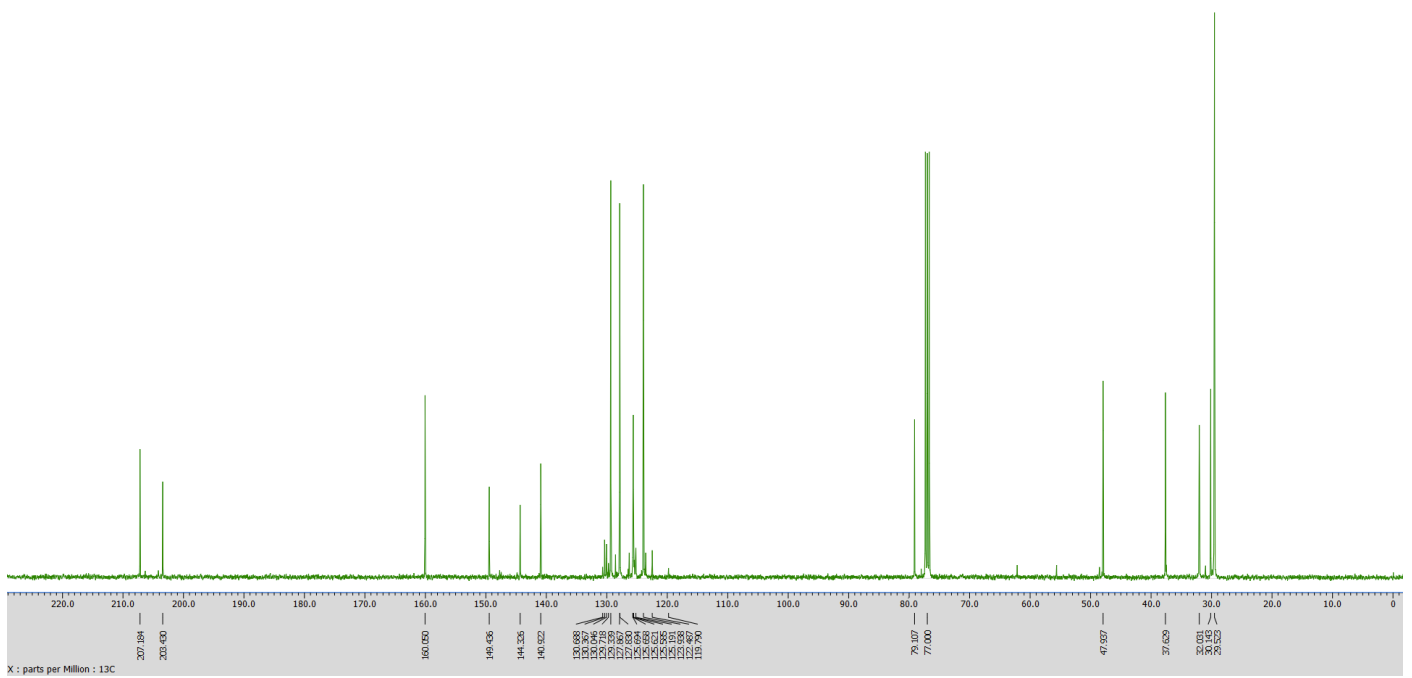

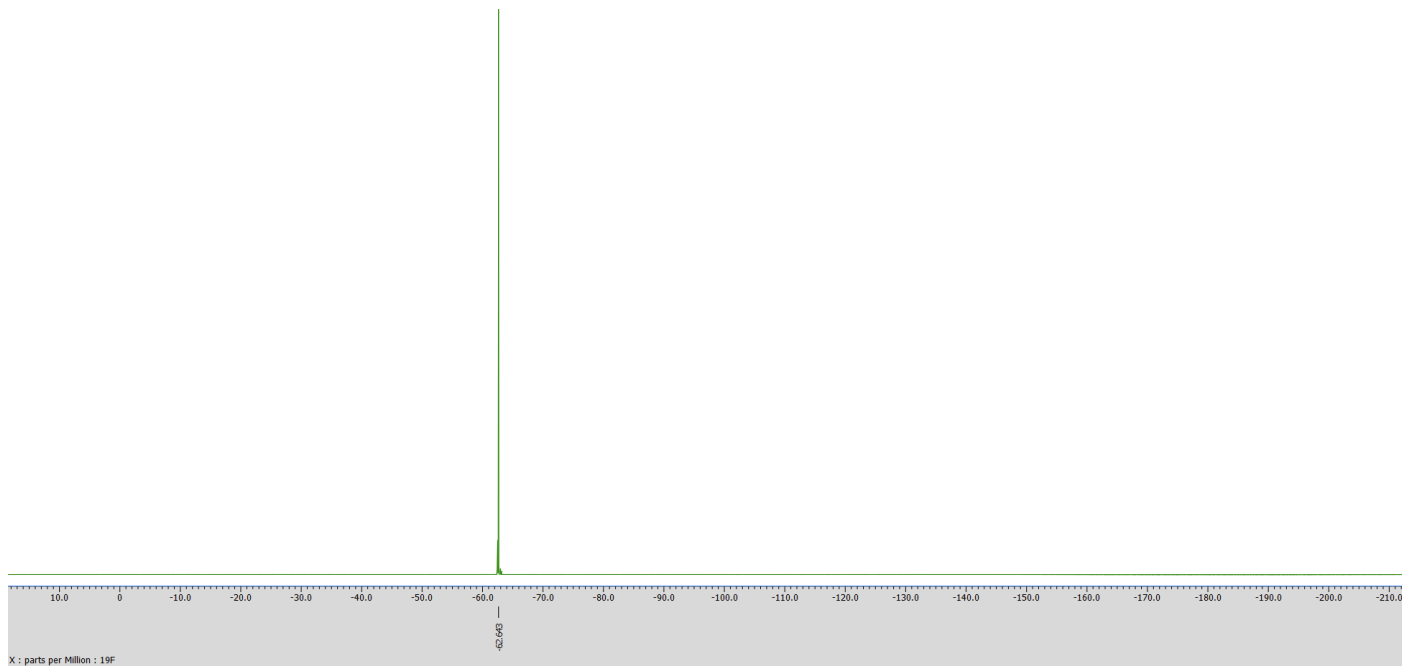

4h (racemate)

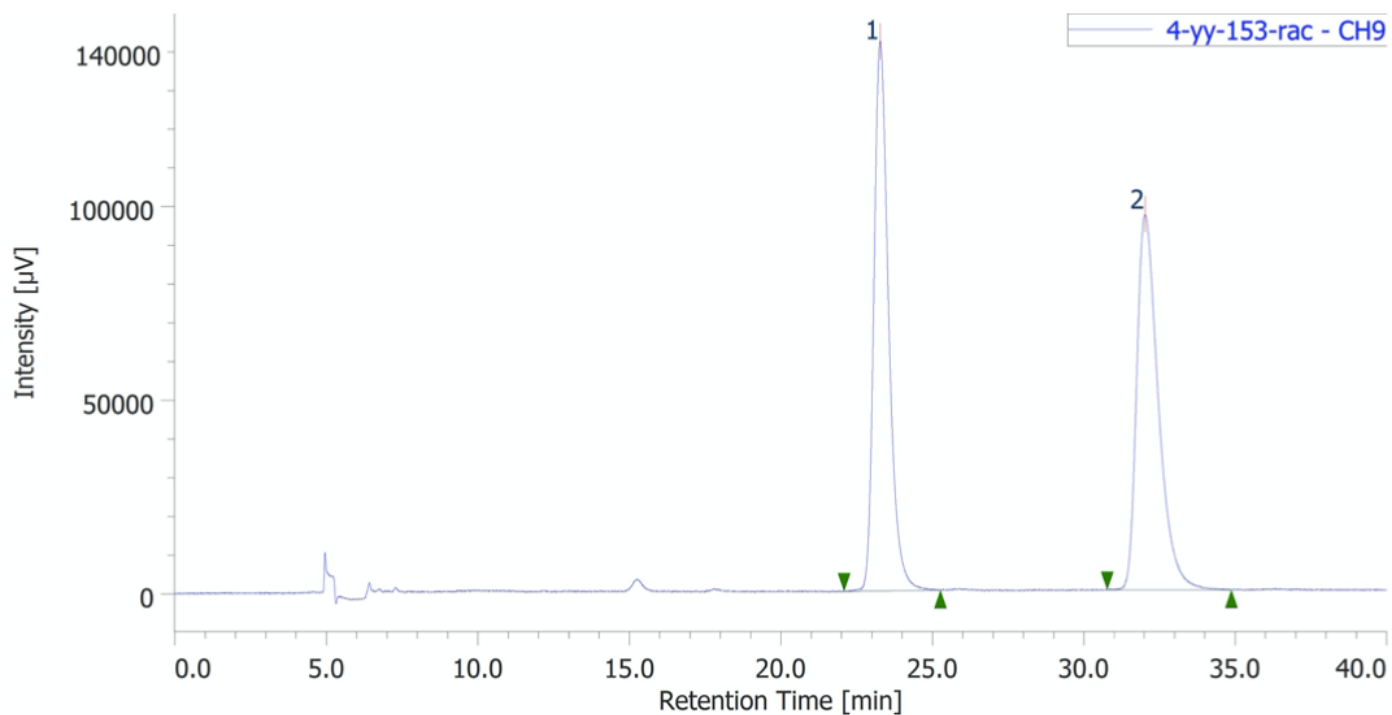

| # | ピーク名    | CH | tR [min] | 面積 [μV·sec] | 高さ [μV] | 面積%    | 高さ%    | 定量値 | NTP   | 分離度   | シンメトリー係数 | 警告 |
|---|---------|----|----------|-------------|---------|--------|--------|-----|-------|-------|----------|----|
| 1 | Unknown | 9  | 23.268   | 4806819     | 141900  | 50.077 | 59.412 | N/A | 11743 | 8.288 | 1.351    |    |
| 2 | Unknown | 9  | 32.023   | 4792103     | 96942   | 49.923 | 40.588 | N/A | 10345 | N/A   | 1.520    |    |

4h

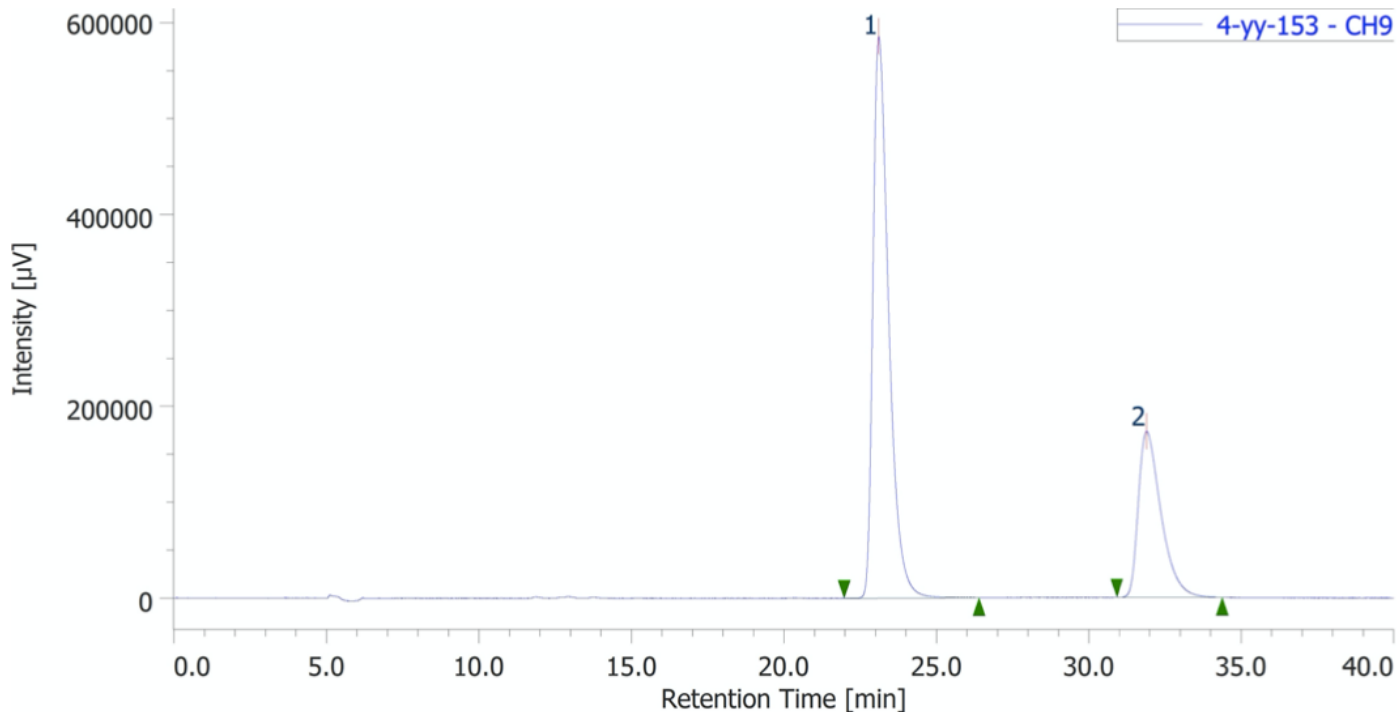

| # | ピーク名    | CH | tR [min] | 面積 [μV·sec] | 高さ [μV] | 面積%    | 高さ%    | 定量値 | NTP   | 分離度   | シンメトリー係数 | 警告 |
|---|---------|----|----------|-------------|---------|--------|--------|-----|-------|-------|----------|----|
| 1 | Unknown | 9  | 23.103   | 21046361    | 585702  | 70.192 | 77.214 | N/A | 10236 | 7.871 | 1.614    |    |
| 2 | Unknown | 9  | 31.885   | 8937498     | 172839  | 29.808 | 22.786 | N/A | 9280  | N/A   | 1.679    |    |

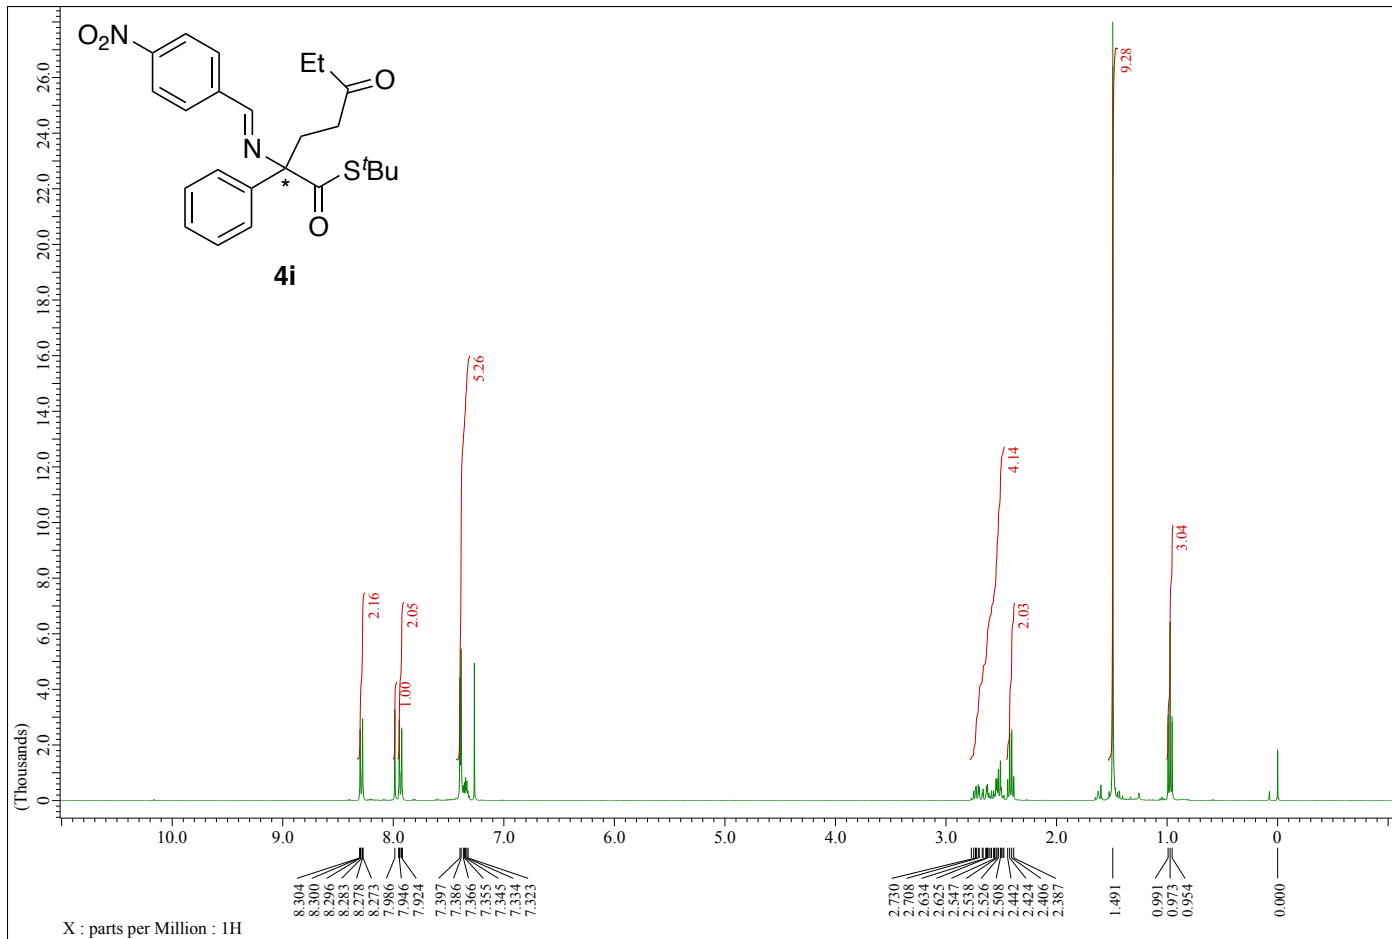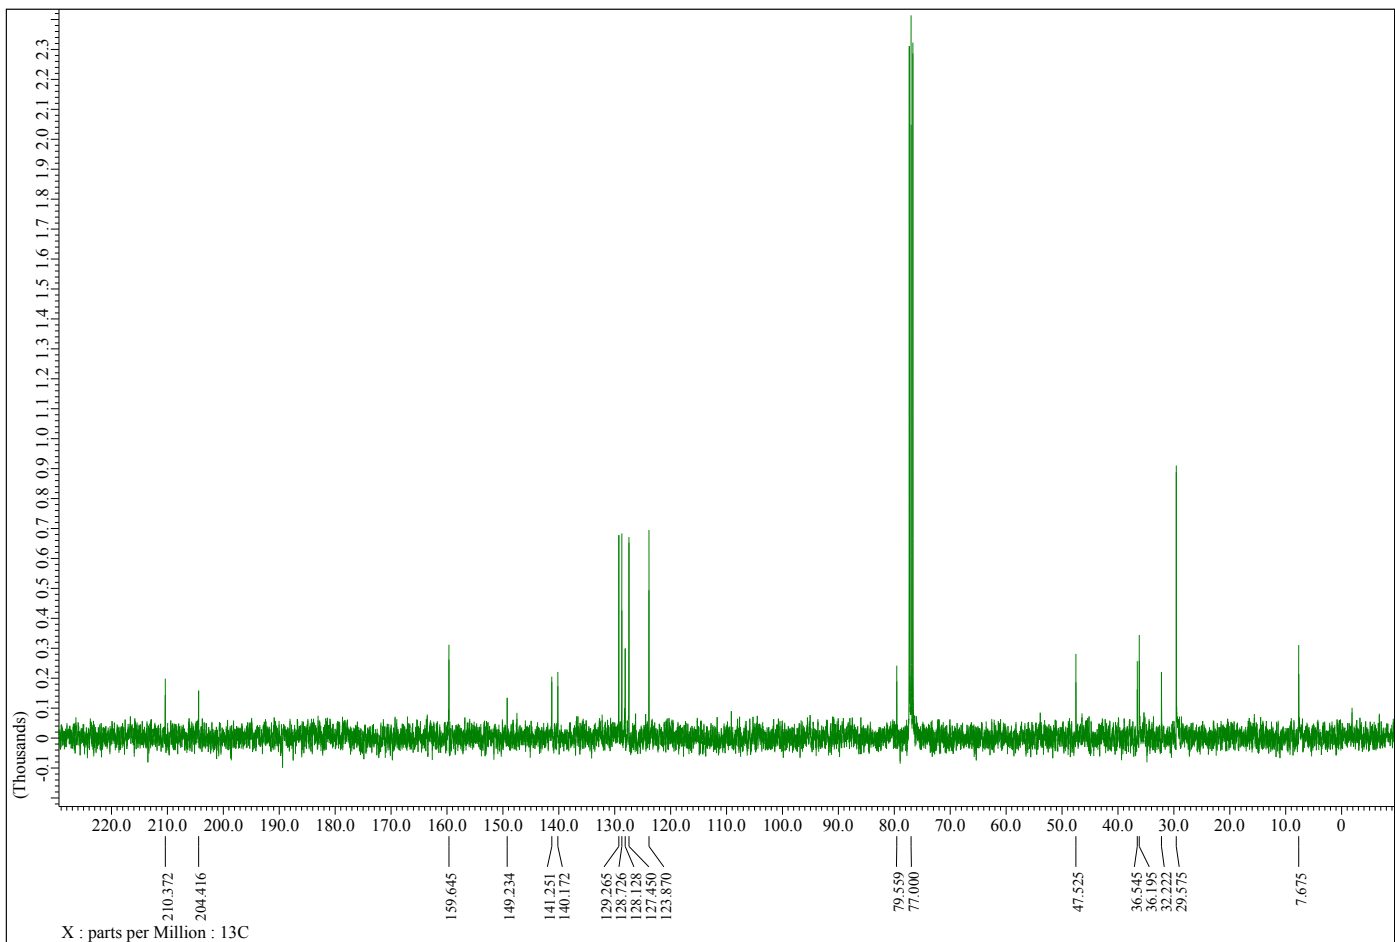

4i (racemate)

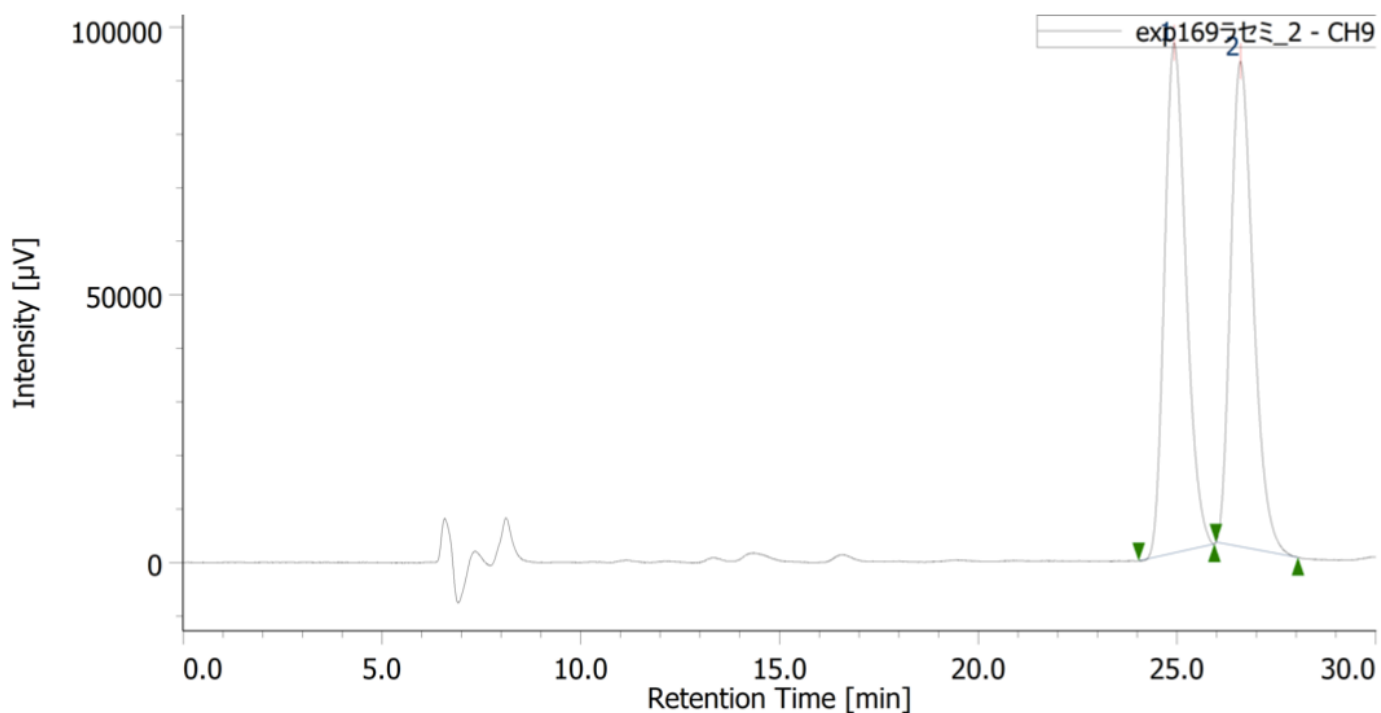

| # | ピーク名    | CH | tR [min] | 面積 [μV·sec] | 高さ [μV] | 面積%    | 高さ%    | 定量値 | NTP   | 分離度   | シンメトリー係数 | 警告 |
|---|---------|----|----------|-------------|---------|--------|--------|-----|-------|-------|----------|----|
| 1 | Unknown | 9  | 24.923   | 3584753     | 95224   | 50.092 | 51.241 | N/A | 10071 | 1.654 | 1.239    |    |
| 2 | Unknown | 9  | 26.597   | 3571540     | 90611   | 49.908 | 48.759 | N/A | 10548 | N/A   | 1.304    |    |

4i

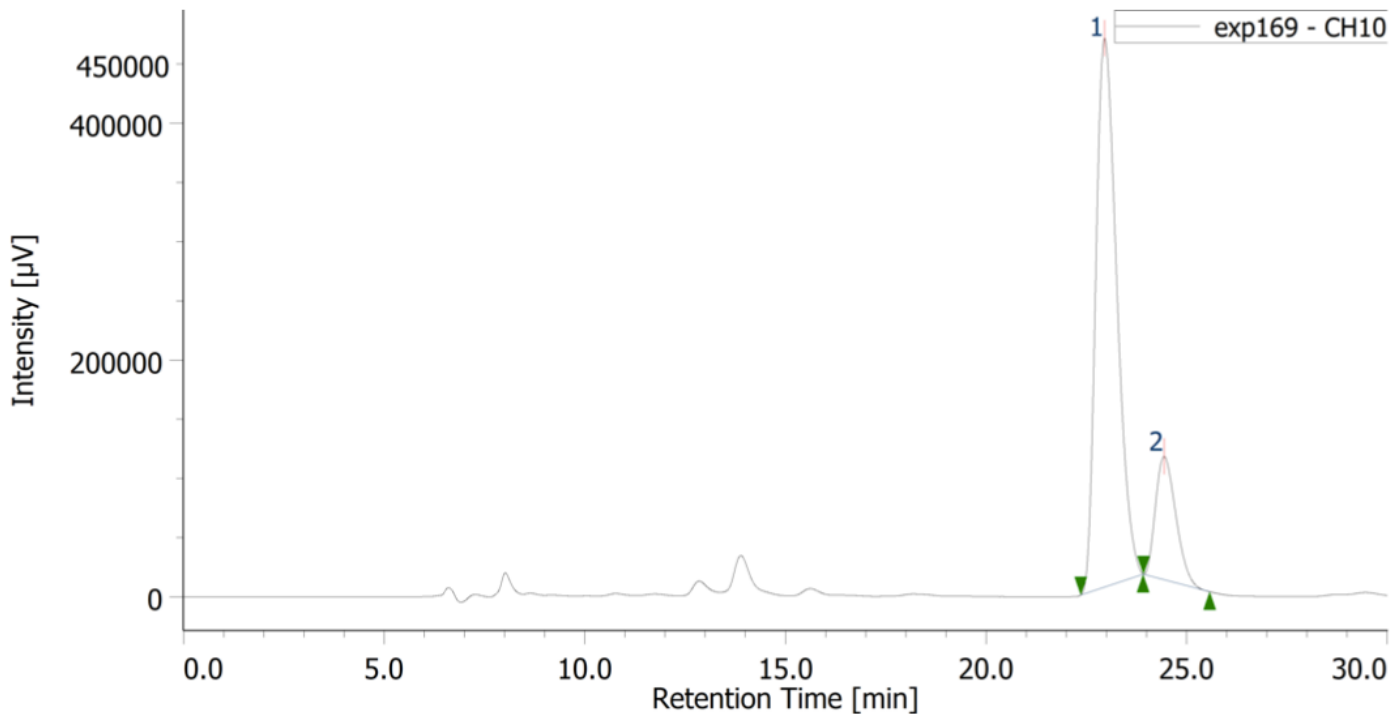

| # | ピーク名    | CH | tR [min] | 面積 [μV·sec] | 高さ [μV] | 面積%    | 高さ%    | 定量値 | NTP   | 分離度   | シンメトリー係数 | 警告 |
|---|---------|----|----------|-------------|---------|--------|--------|-----|-------|-------|----------|----|
| 1 | Unknown | 10 | 22.950   | 16855830    | 463254  | 82.137 | 81.673 | N/A | 8948  | 1.550 | 1.351    |    |
| 2 | Unknown | 10 | 24.433   | 3665866     | 103955  | 17.863 | 18.327 | N/A | 10615 | N/A   | 1.332    |    |

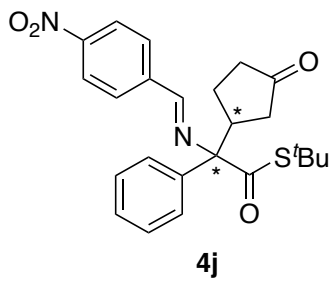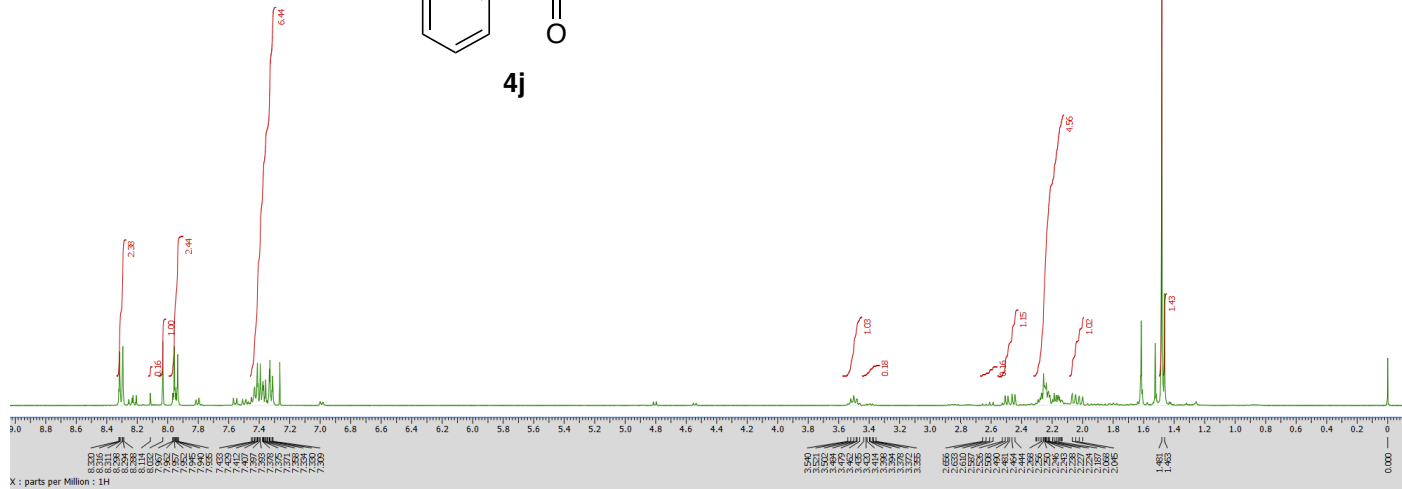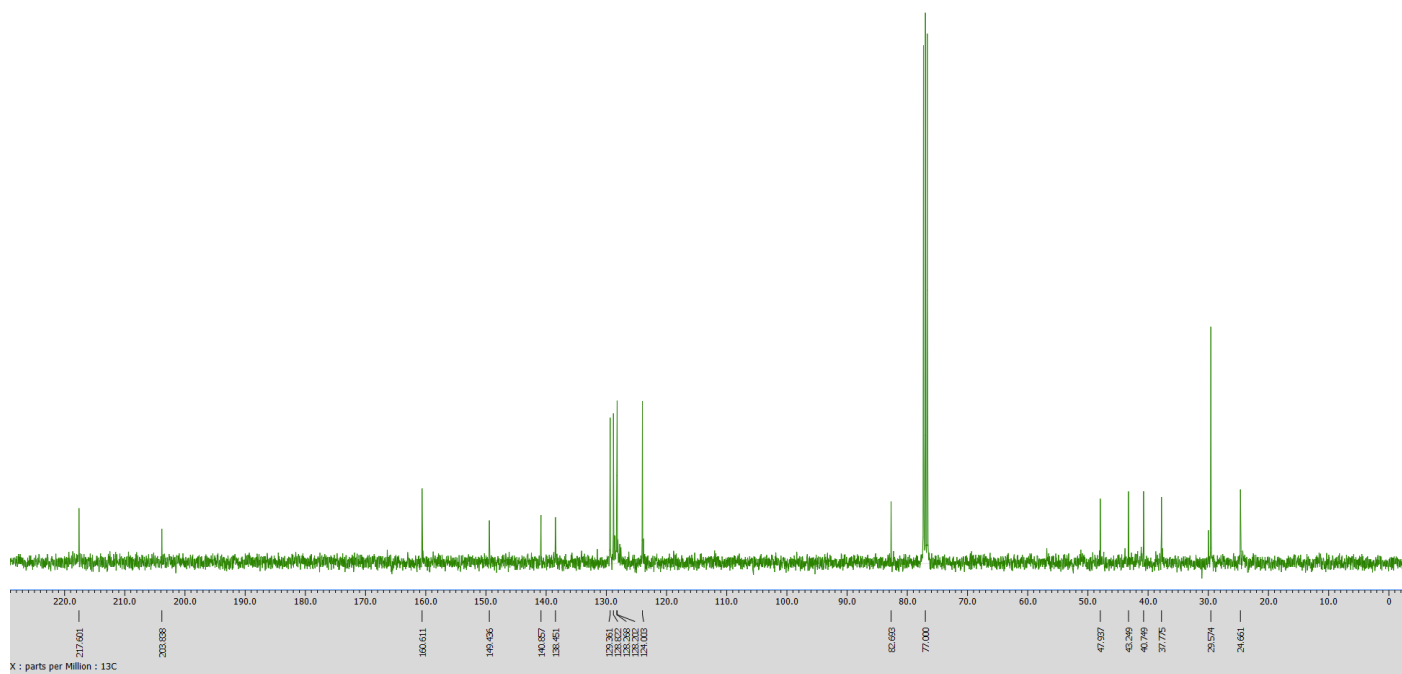



4j (racemate)

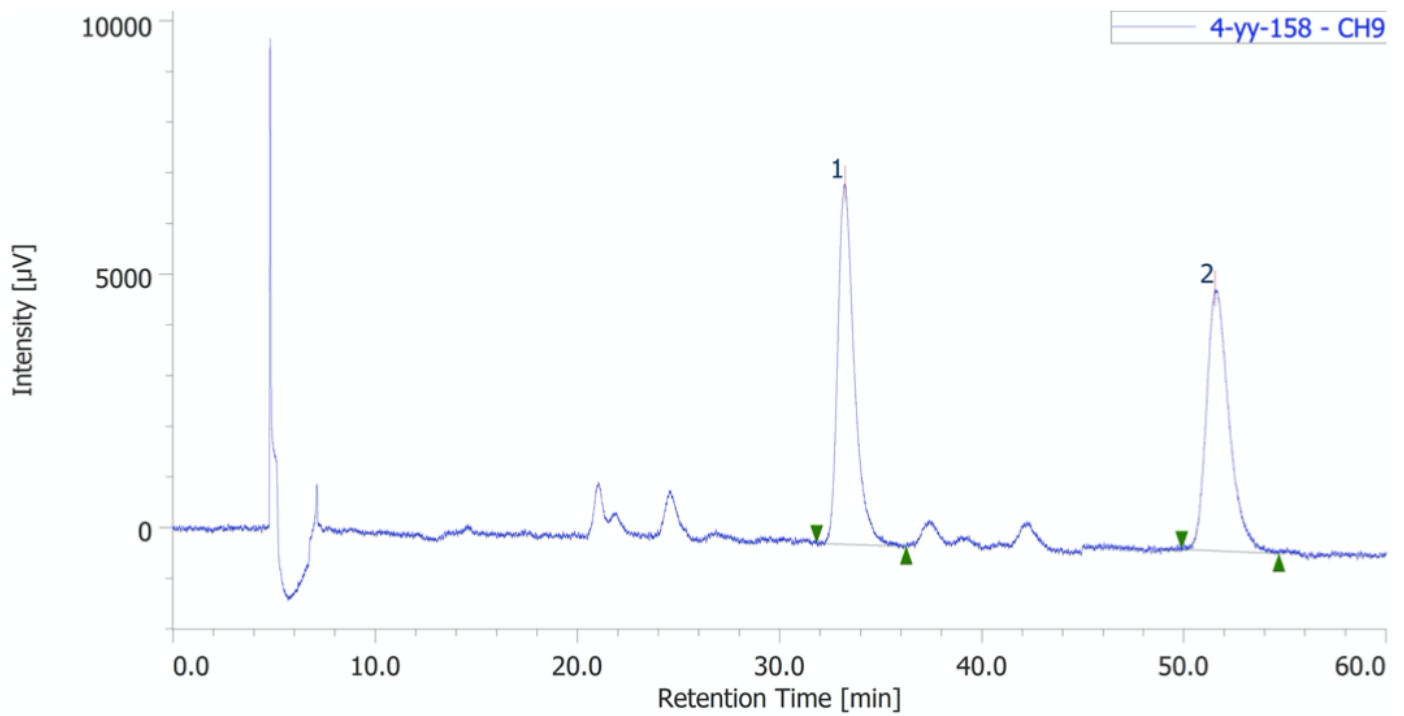

| # | ピーク名    | CH | tR [min] | 面積 [μV·sec] | 高さ [μV] | 面積%    | 高さ%    | 定量値 | NTP   | 分離度    | シンメトリー係数 | 警告 |
|---|---------|----|----------|-------------|---------|--------|--------|-----|-------|--------|----------|----|
| 1 | Unknown | 9  | 33.225   | 402531      | 7105    | 50.089 | 57.887 | N/A | 8826  | 10.887 | 1.415    |    |
| 2 | Unknown | 9  | 51.547   | 401108      | 5169    | 49.911 | 42.113 | N/A | 11063 | N/A    | 1.484    |    |

4j

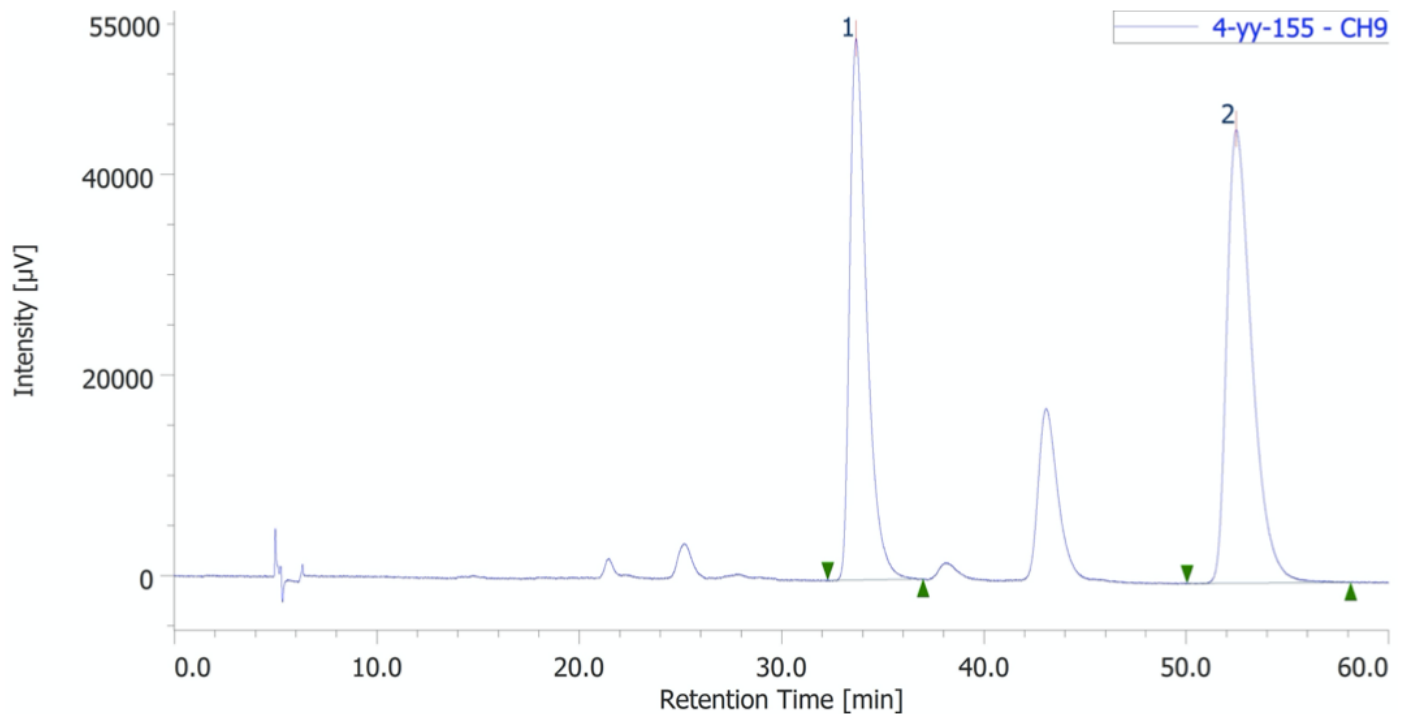

| # | ピーク名    | CH | tR [min] | 面積 [μV·sec] | 高さ [μV] | 面積%    | 高さ%    | 定量値 | NTP  | 分離度    | シンメトリー係数 | 警告 |
|---|---------|----|----------|-------------|---------|--------|--------|-----|------|--------|----------|----|
| 1 | Unknown | 9  | 33.663   | 3143090     | 53956   | 44.698 | 54.404 | N/A | 8355 | 10.244 | 1.647    |    |
| 2 | Unknown | 9  | 52.462   | 3888695     | 45219   | 55.302 | 45.596 | N/A | 9042 | N/A    | 1.582    |    |



4k

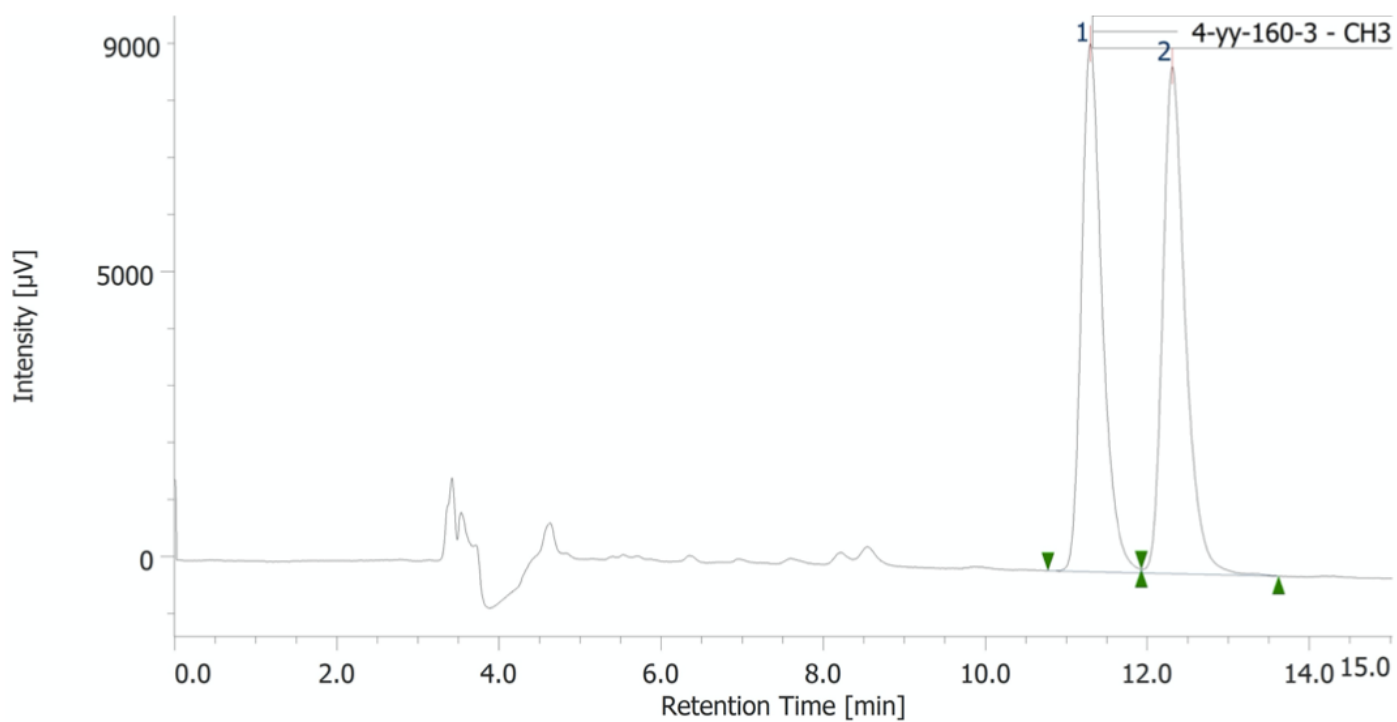

| # | ピーク名    | CH | tR [min] | 面積 [μV·sec] | 高さ [μV] | 面積%    | 高さ%    | 定量値 | NTP   | 分離度   | シンメトリー係数 | 警告 |
|---|---------|----|----------|-------------|---------|--------|--------|-----|-------|-------|----------|----|
| 1 | Unknown | 3  | 11.292   | 165266      | 9261    | 49.022 | 51.012 | N/A | 10029 | 2.179 | 1.352    |    |
| 2 | Unknown | 3  | 12.308   | 171862      | 8893    | 50.978 | 48.988 | N/A | 10317 | N/A   | 1.339    |    |

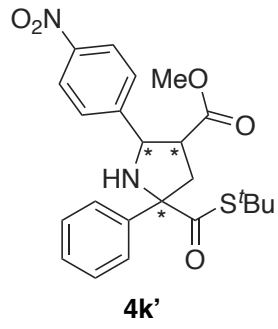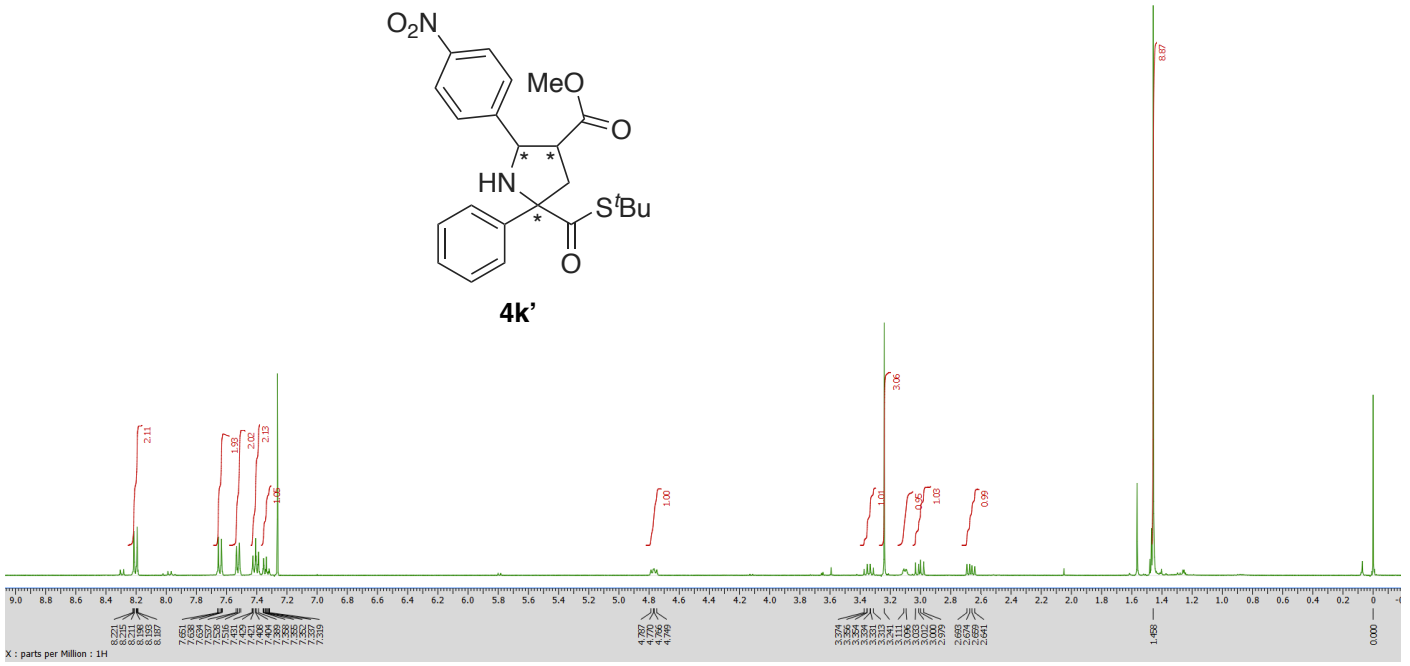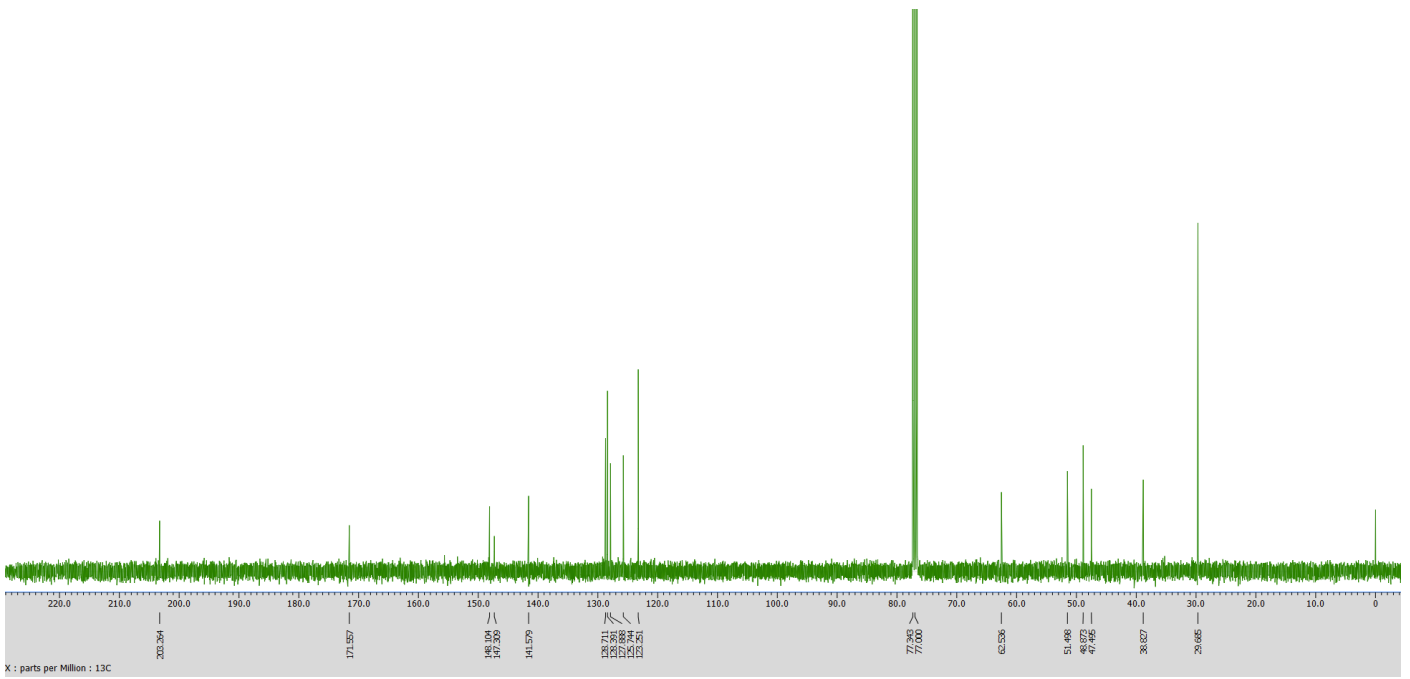

4k'

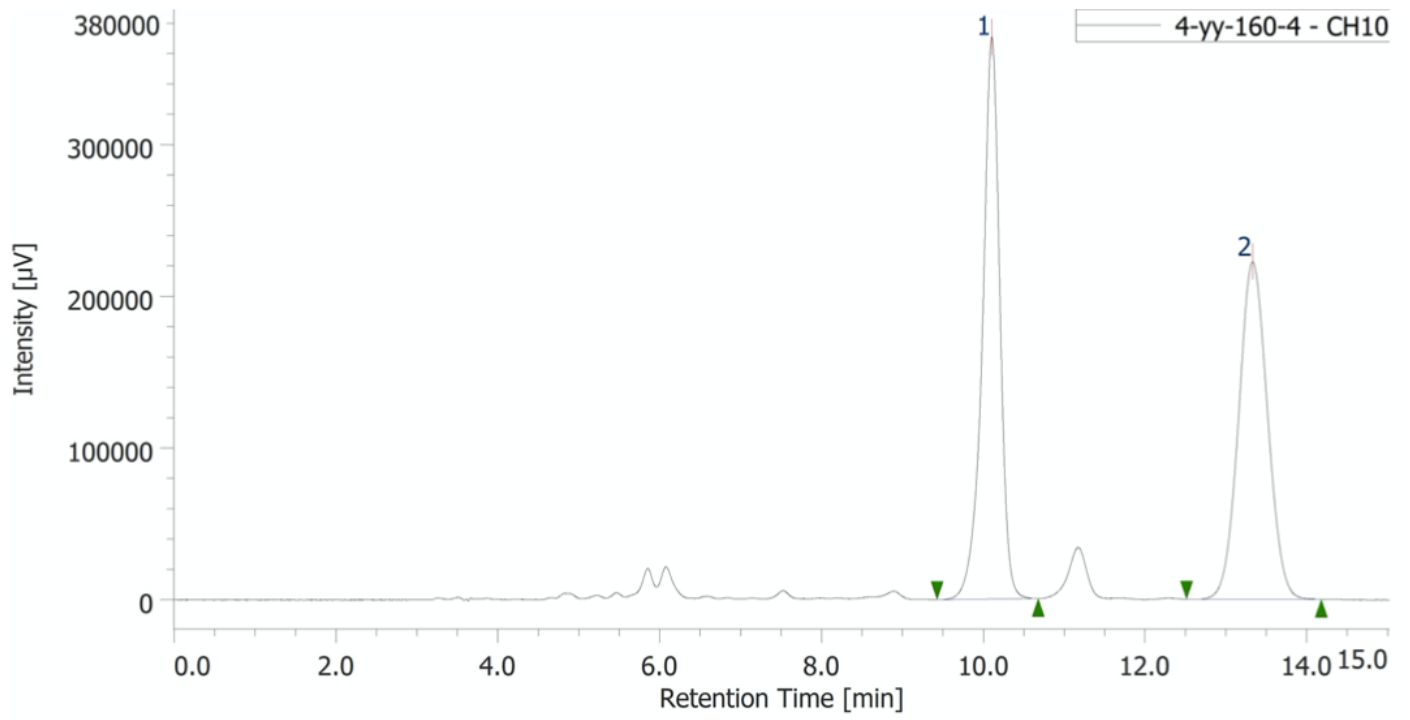

| # | ピーク名    | CH | tR [min] | 面積 [μV·sec] | 高さ [μV] | 面積%    | 高さ%    | 定量値 | NTP   | 分離度   | シンメトリー係数 | 警告 |
|---|---------|----|----------|-------------|---------|--------|--------|-----|-------|-------|----------|----|
| 1 | Unknown | 10 | 10.100   | 5531748     | 370241  | 50.078 | 62.482 | N/A | 11924 | 6.327 | 0.885    |    |
| 2 | Unknown | 10 | 13.328   | 5514616     | 222312  | 49.922 | 37.518 | N/A | 6659  | N/A   | 1.044    |    |
